# Supplementary material for: Scratch-induced partial skin wounds re-epithelialize by sheets of independently migrating keratinocytes
Source: Life Sci Alliance. 2020 Nov 30;4(1):e202000765. doi: 10.26508/lsa.202000765 (PMC7723264; doi:10.26508/lsa.202000765)
Supplement: Supplementary file 2 [file LSA-2020-00765_SdataF2.xlsx]

## Sheet: Fig2A
basal keratinocytes sizes
0h					8h					16h					24h
0-200	200-400	400-600	600-800		0-200	200-400	400-600	600-800		0-200	200-400	400-600	600-800		0-200	200-400	400-600	600-800
69.3	62.7	171.6	112.2		127.05	67.65	194.7	92.4		485.1	207.9	136.95	176.55		463.65	471.9	118.8	315.15
132	115.5	145.2	61.05		151.8	74.25	59.4	153.45		150.15	227.7	356.4	201.3		445.5	135.3	100.65	85.8
105.6	90.75	161.7	61.05		59.4	84.15	163.35	217.8		122.1	297	198	87.45		473.55	145.2	278.85	77.55
201.3	135.3	249.15	110.55		69.3	75.9	64.35	160.05		100.65	221.1	97.35	232.65		376.2	64.35	339.9	122.1
123.75	165	199.65	184.8		174.9	75.9	85.8	108.9		132	130.35	240.9	320.1		326.7	122.1	181.5	249.15
117.15	194.7	206.25	102.3		84.15	70.95	103.95	112.2		66	57.75	141.9	107.25		400.95	300.3	229.35	235.95
191.4	100.65	257.4	118.8		80.85	229.35	161.7	108.9		118.8	183.15	303.6	262.35		61.05	239.25	94.05	252.45
288.75	244.2	455.4	113.85		161.7	105.6	146.85	153.45		265.65	377.85	184.8	191.4		486.75	293.7	62.7	285.45
145.2	143.55	214.5	70.95		89.1	72.6	97.35	163.35		92.4	145.2	122.1	153.45		366.3	295.35	702.9	140.25
82.5	87.45	165	67.65		306.9	255.75	72.6	92.4		235.95	82.5	140.25	161.7		115.5	343.2	336.6	179.85
113.85	113.85	255.75	132		74.25	57.75	85.8	64.35		62.7	747.45	325.05	250.8		541.2	344.85	681.45	300.3
130.35	100.65	437.25	97.35		62.7	133.65	136.95	219.45		90.75	135.3	171.6	445.5		371.25	207.9	397.65	89.1
128.7	186.45	75.9	141.9		95.7	103.95	66	82.5		188.1	247.5		262.35		234.3	198	354.75	282.15
110.55	249.15	300.3	231		112.2	107.25	57.75	69.3		562.65	224.4	79.2	102.3		301.95	176.55	280.5	303.6
268.95	165	219.45	188.1		87.45	168.3	100.65	62.7		100.65	343.2	66	186.45		359.7	382.8	488.4	323.4
217.8	97.35	193.05	330		62.7	87.45	70.95	150.15		306.9	231	141.9	85.8		742.5	59.4	466.95	189.75
140.25	108.9	117.15	384.45		138.6	87.45	103.95	56.1		232.65	399.3	151.8	173.25		564.3	445.5	300.3	64.35
191.4	62.7	235.95	107.25		82.5	99	171.6	62.7		214.5	130.35	85.8	384.45		278.85	429	75.9	188.1
57.75	191.4	108.9	160.05		107.25	100.65	74.25	117.15		143.55	399.3	79.2	504.9		92.4	90.75	453.75	155.1
204.6	229.35	122.1	79.2		92.4	146.85	69.3	94.05		80.85	244.2	410.85	196.35		476.85	66	433.95	64.35
330	211.2	94.05	163.35		72.6	115.5	103.95	219.45		158.4	506.55	61.05	122.1		334.95	260.7	493.35	56.1
186.45	146.85	145.2	316.8		95.7	150.15	99	74.25		240.9	89.1	117.15	183.15		97.35	275.55	344.85	287.1
57.75	201.3	427.35	85.8		66	64.35	77.55	59.4		145.2	326.7	61.05	191.4		270.6	207.9	412.5	311.85
191.4	100.65	212.85	67.65		105.6	82.5	79.2	57.75		100.65	435.6	490.05	97.35		328.35	574.2	349.8	229.35
138.6	247.5	343.2	156.75		184.8	99	79.2	57.75		196.35	143.55	320.1	214.5		320.1	196.35	273.9	136.95
214.5	399.3	160.05	255.75		90.75	57.75	75.9	97.35		339.9	214.5	419.1	171.6		292.05	59.4	551.1	452.1
321.75	158.4	186.45	56.1		75.9	113.85	57.75	70.95		333.3	328.35	633.6	97.35		153.45	343.2	136.95	64.35
102.3	198	57.75	221.1		283.8	186.45	59.4	75.9		173.25	481.8	310.2	118.8		280.5	369.6	351.45	82.5
493.35	216.15	107.25	191.4		64.35	133.65	108.9	56.1		194.7	118.8	77.55	117.15		452.1	224.4	278.85	318.45
127.05	186.45	140.25	74.25		105.6	57.75	161.7	75.9		217.8	452.1	135.3	214.5		445.5	372.9	1254	206.25
67.65	66	298.65	198		66	130.35	77.55	221.1		183.15	283.8	84.15	189.75		118.8	673.2	597.3	273.9
107.25	178.2	532.95	57.75		70.95	57.75	69.3	92.4		176.55	165	282.15	684.75		201.3	443.85	214.5	330
409.2	100.65	74.25	125.4			94.05	102.3	102.3		97.35	237.6	99	77.55		128.7	711.15	384.45	85.8
169.95	346.5	151.8	171.6		255.75	74.25	87.45	120.45		118.8	280.5	219.45	447.15		277.2	305.25	361.35	125.4
277.2	72.6	87.45	196.35		103.95	70.95	120.45	113.85		153.45	250.8	84.15	145.2		590.7		529.65	577.5
189.75	235.95	120.45	153.45		97.35	57.75	160.05	72.6		188.1	77.55	328.35	264		140.25	56.1	77.55	308.55
554.4	112.2	580.8	62.7		110.55	80.85	79.2	59.4		153.45		1258.95	160.05		82.5	262.35	231	179.85
90.75	193.05	153.45	84.15		103.95	410.85	74.25	122.1		168.3	199.65	158.4	123.75		165	171.6	396	87.45
305.25	193.05	326.7	199.65		102.3	66	102.3	89.1		409.2	308.55	224.4	132		273.9	491.7	84.15	64.35
257.4	179.85	127.05	169.95		153.45	264	59.4	94.05		90.75	77.55	255.75	100.65		160.05	321.75	181.5	222.75
240.9	80.85	57.75	105.6		57.75	85.8	85.8	64.35		206.25		254.1	275.55		490.05	524.7	468.6	226.05
74.25	140.25	178.2	231		87.45	117.15	72.6	125.4		108.9	171.6	123.75	117.15		283.8	320.1	311.85	297
396	214.5	108.9	89.1		74.25	87.45	97.35	69.3		123.75	67.65	235.95	242.55		226.05	1221	138.6	80.85
198	59.4	127.05	465.3		75.9	79.2	64.35	92.4		392.7	277.2	66	188.1		400.95	132	80.85	77.55
56.1	348.15	89.1	171.6		161.7	74.25	103.95	82.5		372.9	198	145.2	188.1		145.2	74.25	478.5	201.3
108.9	163.35	168.3	94.05		89.1	176.55	113.85	156.75		133.65	273.9	103.95	156.75		344.85	90.75	79.2	87.45
226.05	59.4	273.9	292.05		77.55	140.25	99	80.85		201.3	245.85	183.15	270.6		66	92.4	532.95	189.75
160.05	87.45	62.7	89.1		176.55	103.95	90.75	67.65		301.95	341.55	145.2	151.8		376.2	318.45	948.75	353.1
128.7	69.3	95.7	183.15		64.35	69.3	89.1	75.9		80.85	108.9	554.4	310.2		315.15	476.85	562.65	156.75
118.8	135.3	61.05	79.2		140.25	145.2	221.1	97.35		77.55	201.3	136.95	66		247.5	424.05	615.45	140.25
239.25	204.6	115.5	79.2		204.6	94.05	62.7	80.85		136.95	57.75	87.45	100.65		496.65	189.75	499.95	372.9
84.15	156.75	92.4	95.7		118.8	89.1	103.95	99		77.55	107.25	87.45	113.85		265.65	67.65	605.55	160.05
598.95	171.6	103.95	112.2		74.25	99	61.05	135.3		168.3	56.1	234.3	158.4		151.8	366.3	166.65	79.2
163.35	381.15	97.35	108.9		79.2	140.25	87.45	67.65		110.55	240.9	575.85	438.9		623.7	343.2	196.35	313.5
184.8	87.45	113.85	67.65		99	85.8	100.65	59.4		260.7	565.95	143.55	224.4		254.1	400.95	417.45	135.3
490.05	278.85	74.25	79.2		99	110.55	87.45	150.15		541.2	90.75	221.1	160.05		631.95	409.2	72.6	285.45
440.55	234.3	160.05	145.2		87.45		107.25	59.4		87.45	75.9	99	103.95		204.6	161.7	427.35	336.6
135.3	85.8	135.3	64.35		125.4	64.35	69.3	70.95		132	146.85	66	112.2		229.35	120.45	59.4	56.1
87.45	202.95	160.05	166.65		87.45	61.05	61.05	117.15		165	278.85	90.75	112.2		371.25	158.4	518.1	127.05
105.6	130.35	122.1	174.9		85.8	691.35	67.65	148.5		84.15	56.1	143.55	133.65		272.25	318.45	282.15	69.3
135.3	85.8	240.9	102.3		102.3	84.15	57.75	148.5		84.15	768.9	165	303.6		348.15	501.6	306.9	99
117.15	207.9	178.2	191.4		56.1	95.7	127.05	381.15		85.8	270.6	136.95	138.6		145.2	90.75	70.95	196.35
207.9	242.55	122.1	72.6		77.55	212.85	99	62.7		151.8	201.3	115.5	118.8		165	202.95	364.65	79.2
128.7	87.45	245.85	89.1		94.05	66	79.2	95.7		125.4	70.95	584.1	100.65		188.1		872.85	112.2
204.6	447.15	90.75	267.3		84.15	115.5	64.35	102.3		270.6	102.3	221.1	79.2		79.2		580.8	127.05
125.4	66	62.7	95.7		102.3	57.75	57.75	254.1		75.9	143.55	379.5			594	99	495	201.3
112.2	396	67.65	87.45		61.05	133.65	103.95	69.3		80.85	877.8	95.7	176.55		237.6	61.05	572.55	242.55
108.9	95.7		219.45		100.65	100.65	199.65	128.7		123.75	207.9	156.75	169.95		384.45	250.8	135.3	358.05
176.55	179.85	290.4	95.7		89.1	85.8	74.25	89.1		90.75	376.2		94.05		62.7	244.2	171.6	122.1
189.75	82.5	125.4	171.6		67.65	82.5		72.6		89.1	108.9	115.5	133.65		171.6	435.6	308.55	259.05
70.95	138.6	80.85	77.55		272.25	61.05	94.05	87.45		122.1	112.2	89.1	99		102.3	577.5	376.2	412.5
	143.55	229.35	138.6		87.45	75.9	79.2	90.75		163.35	158.4	120.45	140.25		339.9	432.3	506.55	250.8
122.1	174.9	231	173.25		64.35	231	323.4	61.05		97.35	303.6	95.7	100.65		311.85	633.6	300.3	136.95
268.95	171.6	61.05			72.6	67.65	75.9	186.45		80.85	150.15	174.9	209.55		463.65	249.15	402.6	701.25
145.2	66	369.6	353.1		143.55	734.25	77.55	62.7		165	135.3	95.7	367.95		310.2	94.05	87.45	59.4
344.85	67.65	62.7	99		133.65	56.1	130.35	265.65		179.85		108.9	102.3		376.2	130.35	204.6	240.9
239.25	169.95	113.85	75.9		278.85	56.1	70.95	189.75		130.35	196.35	630.3	66		102.3	77.55	295.35	163.35
150.15	130.35	97.35	136.95		105.6	79.2	122.1	80.85		166.65	391.05	125.4	235.95		140.25	146.85	516.45	219.45
80.85	161.7	77.55	94.05		135.3	153.45	344.85	64.35		381.15	102.3	295.35	100.65		377.85	216.15	575.85	280.5
72.6	61.05	118.8	122.1		198	56.1	145.2	77.55		176.55	148.5	158.4	103.95		57.75	504.9	861.3	61.05
61.05	66	196.35	254.1		69.3	57.75	161.7			112.2	161.7	105.6	387.75		250.8	117.15	435.6	402.6
115.5		249.15	234.3		136.95	112.2	193.05	100.65		221.1	80.85	212.85	141.9		222.75	526.35	69.3	379.5
145.2	97.35	66	412.5		103.95	105.6	64.35	143.55		66	140.25	103.95	201.3		433.95	348.15	57.75	198
127.05	176.55	99	92.4		70.95	173.25	105.6	75.9		292.05	59.4	107.25	313.5		102.3	268.95	194.7	249.15
128.7	193.05	80.85	392.7		80.85	178.2	61.05	82.5		155.1	290.4	120.45	288.75		617.1	72.6	516.45	292.05
158.4	155.1	189.75	136.95		204.6	66	118.8	122.1		158.4	141.9	94.05	466.95		189.75	66	339.9	391.05
369.6	209.55	250.8	173.25		132	87.45	100.65	156.75		120.45	297	108.9	64.35		85.8	394.35	270.6	513.15
232.65	202.95	250.8	80.85		77.55	90.75	112.2	133.65		74.25	89.1	191.4	150.15		69.3	92.4		313.5
103.95	108.9	176.55	160.05		136.95	72.6	146.85	397.65		94.05	128.7	66	122.1		313.5	960.3	179.85	264
69.3	94.05	89.1	94.05		72.6	66	70.95	118.8		100.65	194.7	285.45	429		265.65	772.2	56.1	270.6
189.75	146.85	189.75	196.35		70.95	85.8	122.1	194.7		343.2	224.4	117.15	902.55		242.55	227.7	316.8	374.55
183.15	115.5	160.05	56.1		229.35	75.9	66	138.6		113.85	237.6	145.2	389.4		636.9	565.95	118.8	107.25
145.2	127.05	178.2	163.35		92.4	69.3	176.55	70.95		184.8	275.55	166.65	239.25		488.4	270.6	160.05	235.95
160.05	85.8	384.45	82.5		103.95	72.6	141.9	94.05		67.65	252.45	80.85	57.75		503.25	75.9	148.5	351.45
56.1	123.75	77.55	89.1		156.75	64.35	72.6	105.6		409.2	176.55	82.5	69.3		315.15	330	181.5	112.2
176.55	87.45	259.05	67.65		94.05	97.35	72.6	75.9		80.85	290.4	127.05	89.1		297	1074.15	544.5	250.8
72.6	122.1	148.5	179.85		77.55	153.45	113.85	118.8		232.65	56.1	181.5	87.45		80.85	506.55	1580.7	85.8
92.4	234.3	92.4	153.45		100.65	57.75	110.55	130.35		145.2	141.9	103.95	196.35		207.9	191.4	330	216.15
79.2	366.3	132	145.2		120.45	85.8	89.1	92.4		193.05	136.95	107.25	442.2		69.3	247.5	79.2	141.9
99	132	59.4	259.05		138.6	97.35	94.05	62.7		105.6	219.45	133.65	82.5		465.3	70.95	69.3	471.9
115.5	89.1	57.75	207.9		113.85	61.05	59.4	70.95			364.65	103.95	165		66	658.35	384.45	354.75
138.6	85.8	108.9	108.9		132	82.5	79.2	64.35		84.15	206.25	201.3	235.95		288.75	389.4	229.35	118.8
189.75	103.95	160.05	217.8		97.35	74.25	90.75	206.25		84.15	145.2	193.05	288.75		204.6	155.1	240.9	224.4
146.85	239.25	56.1	173.25			66	255.75	67.65		268.95	389.4	108.9	158.4		282.15	85.8	580.8	412.5
516.45	105.6	138.6	82.5		178.2	70.95	99	79.2		188.1	237.6	140.25	305.25		311.85	110.55	425.7	396
89.1	75.9	339.9	132		176.55	75.9	189.75	100.65		66	608.85	130.35	163.35		437.25	394.35	483.45	519.75
100.65	138.6	113.85	105.6		74.25	528	72.6	948.75		132	598.95	265.65	102.3		265.65	118.8	427.35	595.65
186.45	255.75	150.15	108.9		115.5	69.3	113.85	92.4		97.35	92.4	113.85	64.35		283.8	361.35	301.95	429
217.8	70.95	82.5	138.6		67.65	112.2	62.7	74.25		242.55	130.35		207.9		67.65	631.95	1128.6	95.7
186.45	305.25	153.45	216.15		346.5	79.2	278.85	189.75		293.7	404.25	564.3	183.15		239.25	435.6	452.1	179.85
94.05	87.45	198	414.15		301.95	768.9	92.4	270.6		455.4	66	211.2	145.2		99	59.4	292.05	92.4
128.7	240.9	67.65	140.25		75.9	75.9	84.15	56.1		247.5	201.3	452.1	117.15		191.4	201.3	264	168.3
89.1	171.6	80.85	67.65		207.9		70.95	1485		127.05	67.65	56.1	123.75		392.7	138.6	270.6	75.9
94.05	338.25	57.75	92.4		87.45	80.85	112.2	90.75		211.2	160.05	103.95	143.55		189.75	108.9	120.45	90.75
122.1	77.55	132	70.95		59.4	176.55	61.05	69.3		67.65	95.7	145.2	364.65			202.95	343.2
103.95	325.05	168.3	125.4		57.75	56.1	95.7	99		92.4	141.9	105.6	181.5		239.25	242.55	1519.65	280.5
201.3	224.4	64.35	87.45		100.65	179.85	74.25	128.7		64.35	201.3	445.5	475.2		66	176.55	156.75	377.85
143.55	184.8	138.6	141.9		82.5	77.55	90.75	140.25		387.75	188.1	249.15	141.9		575.85	87.45	201.3	148.5
117.15	212.85	57.75	64.35		90.75	108.9	72.6	92.4		74.25	115.5	155.1	140.25		138.6	308.55	171.6	155.1
217.8	115.5	156.75	422.4		181.5	87.45	511.5	120.45		100.65	155.1	169.95	282.15		92.4	339.9	235.95	184.8
217.8	184.8	89.1	84.15		103.95	61.05	70.95	69.3		165	97.35	211.2	84.15		1221	247.5	280.5	127.05
136.95	122.1	112.2	66		99	70.95	74.25	67.65		514.8	410.85	402.6	151.8		448.8	760.65	64.35	146.85
226.05	361.35	186.45	122.1		69.3	118.8	127.05	75.9		112.2	62.7	79.2	102.3		993.3	79.2	412.5	239.25
125.4	268.95	132	227.7		56.1	108.9	70.95	158.4		178.2	179.85	143.55	85.8		226.05	113.85	275.55	57.75
212.85	199.65	179.85	400.95		61.05	135.3	69.3	77.55		186.45	260.7	202.95	110.55		272.25	59.4	255.75	117.15
214.5	140.25	79.2	77.55		89.1	120.45	61.05	234.3		235.95	290.4	255.75	95.7		597.3	257.4	161.7	125.4
103.95	496.65	74.25	120.45		331.65	59.4	59.4	160.05		194.7	369.6	56.1	163.35		148.5	168.3	427.35	155.1
61.05	158.4	87.45	145.2		1158.3	100.65	74.25	127.05		1036.2	169.95	244.2	257.4		87.45	397.65	94.05	61.05
110.55	394.35	102.3	198		57.75	77.55	163.35	75.9		179.85	57.75	133.65	169.95		961.95	349.8	356.4	108.9
79.2	94.05	67.65	148.5		62.7	56.1	122.1	115.5		99		237.6	67.65		89.1	186.45	179.85	77.55
128.7	107.25		146.85		120.45	69.3	77.55	84.15		102.3	75.9	56.1	178.2		115.5	136.95	1427.25	204.6
127.05	181.5	156.75	69.3		61.05	90.75	174.9	117.15		207.9	141.9	127.05	237.6		1984.95	240.9	254.1	222.75
61.05	374.55	102.3	130.35		56.1	107.25	67.65	95.7		300.3	90.75	234.3	156.75		523.05	64.35	168.3	72.6
	90.75	232.65	140.25		72.6	59.4	130.35	386.1		245.85	132	92.4	110.55		82.5	217.8	422.4	92.4
150.15	386.1	318.45	353.1		95.7	90.75	123.75	74.25		97.35	762.3	353.1	66		57.75	122.1	313.5	85.8
173.25	141.9	127.05	235.95		79.2	701.25	69.3	94.05		120.45	226.05	412.5			1027.95	424.05	400.95	70.95
594	153.45	113.85	80.85		66	79.2	79.2	57.75		61.05	224.4	74.25	97.35		348.15	153.45	308.55	165
161.7	133.65	89.1	150.15		74.25	69.3	115.5	75.9		56.1	473.55	235.95	105.6		2211	265.65	217.8	174.9
153.45	237.6	115.5	66		90.75	75.9	107.25	67.65		112.2	333.3	123.75	112.2		557.7	257.4	272.25	90.75
99	161.7	123.75	66		122.1	105.6	94.05	89.1		100.65	132	676.5	539.55		358.05	612.15	990	480.15
163.35	150.15	99	232.65		105.6	59.4	61.05	74.25		1636.8	85.8	409.2	273.9		194.7	110.55	64.35	66
59.4	107.25	99	285.45		95.7	66	66	105.6		100.65	301.95	189.75	61.05		75.9	455.4	74.25	127.05
156.75	140.25	150.15	97.35		87.45	57.75	77.55	94.05		315.15	135.3	235.95	66		928.95	176.55	123.75	194.7
84.15	95.7	113.85	145.2		69.3	66	64.35	69.3		64.35	358.05	229.35	359.7		699.6	282.15	198	224.4
425.7	244.2	240.9	95.7		133.65	87.45	75.9	94.05		70.95	64.35	331.65	166.65		925.65	310.2	117.15	585.75
143.55	151.8	292.05	128.7		62.7	84.15	57.75	90.75		92.4	135.3	143.55	189.75		56.1	171.6	270.6	288.75
74.25	141.9	82.5	74.25		202.95		146.85	61.05			85.8	110.55	62.7		895.95	237.6	179.85	128.7
189.75	168.3	133.65	105.6		128.7	128.7	62.7	70.95		356.4	70.95	202.95	92.4		146.85	102.3	396	201.3
559.35	77.55	99	130.35		97.35	94.05	64.35	57.75		156.75	282.15	118.8	963.6		422.4	202.95	257.4	66
133.65	133.65	90.75	267.3		163.35	61.05	67.65	110.55		108.9	110.55	89.1	272.25		636.9	99	176.55	372.9
100.65	295.35	100.65	120.45		117.15	61.05		59.4		245.85	224.4	165	77.55		511.5	457.05	303.6	239.25
226.05	163.35	89.1	70.95		66	97.35	493.35	127.05		452.1	240.9	135.3	367.95		221.1	575.85	75.9	72.6
108.9	128.7	61.05	141.9		59.4	57.75	188.1	151.8		339.9	64.35	130.35	254.1		133.65	66	293.7	557.7
61.05	166.65	102.3	87.45		92.4	85.8	112.2	102.3		404.25	438.9	244.2	94.05		174.9	607.2	277.2	292.05
107.25	123.75	72.6	138.6		84.15	67.65	57.75	72.6		247.5	127.05	132	100.65		105.6	234.3	161.7	179.85
122.1	87.45	135.3	136.95		59.4	67.65	123.75	80.85		123.75	77.55	181.5	151.8		405.9	259.05	217.8	229.35
143.55	133.65	108.9			108.9	79.2	64.35	74.25		110.55	148.5	244.2	105.6		74.25	99	592.35	90.75
84.15	89.1	97.35	82.5		133.65	70.95	82.5	113.85		168.3	165	87.45	171.6		405.9	460.35	254.1	120.45
75.9	145.2	67.65	108.9		69.3	82.5	62.7	325.05		184.8	67.65	128.7	313.5		919.05	82.5	526.35	275.55
146.85	120.45	99	143.55		110.55	130.35	105.6	132		92.4	77.55	179.85	99		313.5	277.2	56.1	174.9
158.4	297	160.05	92.4		84.15	56.1	70.95	112.2		204.6	244.2	397.65	99		292.05	214.5	244.2	143.55
77.55	74.25	70.95	105.6		90.75	122.1	219.45	108.9		123.75	64.35	141.9	133.65		145.2	92.4		158.4
64.35	165	202.95	150.15		165	90.75	145.2	85.8		70.95	115.5	95.7	148.5		587.4	295.35	277.2	244.2
100.65	110.55	105.6	328.35		70.95	102.3	103.95	72.6		508.2	339.9		99		379.5	66	397.65	128.7
103.95	160.05	92.4	89.1		117.15	62.7	247.5	70.95		874.5	160.05	90.75	115.5		438.9	100.65	318.45	82.5
150.15	140.25	107.25	217.8		80.85	62.7	123.75	61.05		270.6	166.65	394.35	250.8		117.15	112.2	528	118.8
140.25	62.7	211.2	250.8		77.55	161.7	89.1			72.6	181.5	231	105.6		183.15		72.6	171.6
79.2	82.5	80.85	97.35		85.8	102.3	138.6	115.5		113.85	112.2	229.35	227.7		62.7	222.75	133.65	206.25
67.65	97.35	56.1	229.35		74.25	75.9	90.75	74.25		123.75	155.1	485.1	184.8		259.05	112.2	359.7	57.75
938.85	97.35	130.35	191.4			79.2	67.65	75.9		165	160.05	158.4	132		202.95	72.6	570.9	219.45
179.85	135.3	99	59.4		82.5	99	95.7	341.55		536.25	148.5	105.6	153.45		112.2	278.85	117.15	311.85
169.95		79.2	85.8		113.85	123.75	102.3	84.15		562.65	183.15	265.65	277.2		612.15	74.25	127.05	135.3
77.55	105.6	125.4	118.8		85.8	61.05	66	62.7		443.85	186.45	143.55	156.75		89.1	140.25	326.7	326.7
115.5	113.85	132	171.6		62.7	57.75	166.65	56.1		201.3	69.3	341.55	61.05		562.65	425.7	176.55	110.55
80.85	115.5	239.25	87.45		295.35	57.75	219.45	57.75		69.3		316.8	90.75		564.3	214.5	202.95	110.55
125.4	113.85	171.6	97.35		117.15	133.65	62.7	94.05		470.25	242.55	204.6	100.65		298.65	514.8	358.05	79.2
176.55	178.2	235.95	94.05		105.6	201.3	67.65	70.95		191.4	59.4	70.95	102.3		450.45	412.5	389.4	178.2
155.1	108.9	122.1	141.9		74.25	143.55	102.3	90.75		105.6	265.65	521.4	151.8		140.25	113.85	1262.25	75.9
62.7	108.9	123.75	136.95		72.6	77.55	122.1	56.1		206.25	155.1	235.95	80.85		831.6	506.55	94.05	202.95
90.75	132	163.35	110.55		70.95	56.1	89.1	99		265.65	189.75	440.55	72.6		85.8	59.4	462	169.95
107.25	171.6	108.9	301.95		95.7	67.65	176.55	59.4		160.05	782.1	470.25	112.2		1542.75	249.15	499.95	277.2
358.05	105.6	95.7	123.75		141.9	80.85	112.2	120.45		273.9	235.95	178.2	141.9		234.3	97.35	184.8	298.65
140.25	282.15	130.35	178.2		85.8	67.65	62.7	267.3		290.4	66	280.5	97.35		463.65	1092.3	399.3	219.45
80.85	143.55	107.25	148.5		89.1	64.35	183.15	103.95		59.4	67.65	501.6	66		112.2	254.1	572.55	339.9
105.6	99	80.85	80.85		67.65	107.25	75.9	206.25		206.25	231	107.25	118.8		219.45	234.3	396	107.25
245.85	113.85	193.05	193.05		87.45	72.6	94.05	521.4			153.45	272.25	196.35		567.6	295.35	300.3	265.65
62.7	94.05	100.65	128.7		69.3	290.4	59.4	193.05		481.8	181.5	364.65	141.9		742.5	292.05	297	257.4
107.25	136.95	57.75	97.35		69.3	89.1	110.55	196.35		280.5	184.8	158.4	430.65		612.15	188.1	150.15	249.15
250.8	87.45	198	158.4		475.2	64.35	138.6	130.35		171.6	255.75	92.4	79.2		130.35	280.5	227.7	165
66	132	69.3	85.8		155.1	57.75	153.45	110.55		161.7	196.35	176.55	95.7		288.75	466.95	580.8	181.5
153.45	77.55	100.65	222.75		61.05	56.1	103.95	90.75		468.6	206.25	457.05	69.3		176.55	462	148.5	145.2
135.3	303.6	221.1	176.55		117.15	84.15	120.45	174.9		117.15	87.45	168.3	105.6		231	442.2	377.85	231
161.7	146.85	191.4	174.9		127.05	127.05	59.4	105.6		199.65	410.85	140.25	141.9		391.05	1049.4	70.95	174.9
145.2	184.8	221.1	201.3		82.5	97.35	69.3	79.2		176.55	132	179.85	178.2		211.2	202.95	344.85	358.05
90.75	344.85	189.75	123.75		74.25	89.1	57.75	64.35		173.25	69.3	260.7	288.75		69.3	62.7	308.55	308.55
100.65	103.95	171.6	130.35		320.1	80.85	70.95	336.6		191.4	77.55	67.65	132		56.1	369.6	69.3	158.4
99	77.55	318.45	202.95		125.4	59.4	99	87.45		132	229.35	247.5	179.85			178.2	133.65	64.35
165	169.95	222.75	103.95		95.7	112.2	56.1	160.05		72.6	125.4	1148.4	148.5		158.4	344.85	283.8	103.95
140.25	115.5	107.25	262.35		108.9	150.15	146.85	145.2		336.6	108.9	178.2	69.3		82.5	574.2	356.4	146.85
84.15	184.8	166.65	99		77.55	148.5	64.35	62.7		82.5	282.15	211.2	127.05		77.55	361.35	326.7	237.6
186.45	160.05	179.85	145.2		94.05	160.05	56.1	117.15		127.05	99	235.95	118.8		366.3	56.1	585.75	189.75
118.8	219.45	160.05	156.75		105.6	64.35	56.1	70.95		651.75	56.1	146.85	275.55		102.3	226.05	72.6	209.55
122.1	249.15	59.4	57.75		179.85	75.9	92.4	59.4		328.35	255.75	212.85	103.95		379.5	476.85	117.15	399.3
151.8	173.25	165	462		59.4	87.45		72.6		57.75	62.7	136.95			396	254.1	343.2	120.45
113.85	146.85	277.2	117.15		97.35	108.9	169.95	108.9		273.9	412.5	110.55	84.15		480.15	391.05	249.15	206.25
146.85	204.6	128.7	188.1		80.85	59.4	122.1	138.6		56.1	100.65	369.6	128.7		376.2	198	354.75	94.05
56.1	110.55	128.7	87.45		156.75	113.85	82.5	95.7		168.3	113.85	57.75	191.4		102.3	466.95	1409.1	57.75
110.55	80.85		117.15		61.05	156.75	105.6	79.2		209.55	287.1	174.9	56.1		193.05	371.25	425.7	128.7
130.35	143.55	174.9	102.3		118.8	79.2	57.75	79.2		113.85	179.85	221.1	141.9		442.2	523.05	280.5	100.65
97.35	191.4	115.5	61.05		189.75	176.55	132	110.55		100.65	234.3	361.35	84.15		232.65	688.05	397.65	168.3
115.5	229.35	179.85	184.8		183.15	82.5	67.65	61.05		108.9	125.4	234.3	221.1		417.45	600.6	103.95	105.6
70.95	97.35	136.95	92.4		89.1	57.75	123.75	94.05		234.3	433.95	64.35	153.45		94.05	92.4	427.35	85.8
153.45	201.3	103.95	452.1		89.1		94.05	113.85		280.5	100.65	160.05	235.95		339.9	508.2	356.4
95.7	224.4	122.1	95.7		77.55	67.65	280.5	66		153.45	56.1	130.35	95.7		163.35	1186.35	272.25	105.6
102.3	382.8	77.55	229.35		66	85.8	99	184.8		75.9	117.15	80.85	79.2		239.25	792	379.5	292.05
64.35	150.15	84.15	165		259.05	70.95	103.95	89.1		132	95.7		117.15		498.3	59.4	102.3	250.8
70.95	110.55	245.85	94.05		67.65	66	89.1	103.95		90.75	166.65	128.7	224.4		283.8	961.95	202.95	107.25
	84.15	168.3	125.4		72.6	95.7	62.7	57.75		161.7	133.65	400.95	166.65		214.5	62.7	1024.65	57.75
470.25	169.95	138.6	120.45		249.15	70.95	84.15	64.35		534.6	66	99	399.3		85.8	542.85	534.6	318.45
103.95	280.5	145.2	80.85		199.65	74.25	67.65	72.6		169.95	325.05	292.05	369.6		442.2	217.8	396	183.15
151.8	56.1	255.75	94.05		80.85	79.2	59.4	123.75		148.5		169.95	82.5		57.75	219.45	70.95	77.55
242.55	193.05	128.7	77.55		221.1	85.8	138.6	184.8		89.1	237.6	123.75	156.75		237.6	211.2	661.65	59.4
166.65	158.4	173.25	62.7		61.05	62.7	75.9	115.5		120.45	219.45	132	216.15		57.75	262.35	321.75	141.9
257.4	72.6	506.55	82.5		379.5	72.6	66	120.45		264	80.85	123.75	130.35		97.35	70.95	336.6	189.75
158.4	160.05	193.05	84.15		140.25	95.7	89.1	102.3		61.05	183.15	69.3	221.1		400.95	244.2	394.35	460.35
136.95	404.25	189.75	92.4		168.3	100.65	70.95	69.3		115.5	273.9	141.9	80.85		458.7	100.65	483.45	158.4
95.7	219.45	133.65	80.85		118.8	99	143.55	84.15		214.5	198	495	153.45		57.75	102.3	598.95	232.65
234.3	57.75	214.5	62.7		181.5	56.1	64.35	148.5		117.15	132	407.55	107.25		752.4	127.05	70.95	75.9
174.9	105.6	151.8	174.9		66	69.3	99	82.5		105.6	227.7	120.45	138.6		82.5	74.25	389.4	297
138.6	188.1	275.55	67.65		66	89.1	56.1	72.6		118.8	133.65	308.55	110.55		249.15	554.4	244.2	118.8
321.75	90.75	212.85	140.25		67.65	72.6	59.4	66		64.35	186.45	227.7	123.75		283.8	590.7	400.95	158.4
140.25	66	189.75	140.25		108.9	97.35	66	66		112.2	56.1	69.3	415.8		613.8	328.35	752.4	128.7
181.5	64.35	145.2	264		59.4	79.2	61.05	61.05		222.75	66	59.4	178.2		59.4	232.65	965.25	376.2
135.3	158.4	77.55	138.6			74.25	56.1	143.55		64.35	415.8	265.65	87.45		118.8	481.8	462	173.25
95.7	181.5	235.95	79.2		56.1	143.55	57.75	128.7			189.75	414.15	443.85		268.95	470.25	354.75	293.7
146.85	166.65	102.3	115.5		94.05	64.35	61.05	112.2		245.85	75.9	315.15	145.2		239.25	178.2	542.85	204.6
173.25	94.05	176.55	94.05		69.3	77.55	57.75	87.45		260.7	201.3	136.95	89.1		130.35	102.3	425.7	466.95
186.45	95.7	579.15	95.7		74.25	61.05	92.4	138.6		99	122.1	132	102.3		303.6	457.05	328.35	84.15
99	151.8	160.05	173.25		107.25	186.45	102.3	120.45		85.8	66	153.45	235.95		74.25	838.2	130.35	191.4
158.4	282.15	128.7	140.25		135.3	69.3	69.3	61.05		61.05	103.95	249.15	148.5		186.45	313.5	730.95	372.9
174.9	66	166.65	165		92.4	217.8	79.2	122.1		166.65	72.6	298.65	336.6		334.95	145.2	57.75	262.35
161.7	163.35	120.45	160.05		148.5	103.95	232.65	193.05		166.65	666.6	66	257.4		75.9	379.5	389.4	99
174.9	363	136.95	89.1		85.8	74.25	62.7	174.9		366.3	232.65	108.9	146.85		74.25	381.15	336.6	117.15
95.7	90.75	118.8	169.95		84.15	140.25	70.95	80.85		148.5	330	107.25	56.1		62.7	140.25	250.8	259.05
120.45	320.1	112.2	87.45		66	56.1	79.2	166.65		146.85	656.7	127.05	150.15		414.15	950.4	490.05	204.6
163.35	130.35	226.05	102.3		110.55	79.2	57.75	97.35		123.75	151.8	74.25	169.95		120.45	328.35	940.5	82.5
158.4	191.4	143.55			125.4	61.05	56.1	117.15		260.7	211.2	234.3	127.05		272.25	1093.95	1486.65	188.1
341.55	460.35	133.65	110.55		69.3	141.9	61.05	127.05		110.55	556.05	364.65	556.05		56.1	367.95	359.7	193.05
94.05	95.7	273.9	57.75		143.55	107.25	56.1	82.5		305.25	252.45	209.55	240.9		156.75	194.7	165	471.9
123.75	97.35	169.95	115.5		67.65	79.2		74.25		95.7	292.05	70.95	112.2		483.45	108.9	169.95	70.95
326.7	118.8	169.95	146.85		105.6	128.7	74.25	80.85		275.55	125.4	184.8	132		361.35	72.6	273.9	201.3
237.6	82.5	268.95	138.6		70.95	123.75	59.4			67.65	59.4	56.1	254.1		150.15		219.45	429
108.9	69.3	105.6	539.55		84.15	90.75	278.85	97.35		105.6	410.85	240.9	62.7		308.55	321.75	74.25	74.25
229.35	343.2	85.8	217.8		59.4	69.3	90.75	56.1		125.4	59.4	155.1	135.3		90.75	311.85	364.65	268.95
108.9	155.1	163.35	184.8		56.1	171.6	59.4	84.15		75.9	221.1	176.55	118.8		462	442.2	56.1	94.05
221.1	72.6	315.15	235.95		56.1	70.95	160.05	103.95		108.9	536.25	127.05	90.75		97.35	275.55	881.1	70.95
105.6	239.25	62.7	292.05		155.1	56.1	72.6	56.1		712.8	89.1	140.25	232.65		97.35	336.6	425.7	280.5
270.6	209.55	163.35	214.5		67.65	99	67.65	169.95		120.45	272.25	311.85	188.1		77.55	348.15	84.15	176.55
95.7	143.55	123.75	155.1		130.35	82.5	118.8	128.7		318.45	282.15	278.85	160.05		87.45	326.7	399.3	122.1
75.9	136.95	110.55	141.9		143.55	150.15	66	174.9		79.2	209.55	171.6	127.05		742.5	452.1	198	92.4
99	87.45	547.8	221.1		105.6	85.8	161.7	59.4		94.05	519.75	125.4	113.85		56.1	196.35	122.1	163.35
422.4	133.65	56.1	219.45		117.15	99	194.7	183.15		285.45	160.05		85.8		171.6	82.5	412.5	366.3
105.6	99	122.1	82.5		99	70.95	61.05	62.7		95.7	260.7	204.6	56.1			59.4	359.7	483.45
204.6		110.55	174.9		61.05	77.55	56.1	67.65		92.4	107.25	146.85	110.55		66	471.9	99	113.85
138.6	174.9	115.5	234.3		69.3	80.85	61.05	82.5		67.65	206.25	82.5	84.15		57.75	70.95	437.25	259.05
118.8	115.5	242.55	84.15		57.75	221.1	97.35	186.45		237.6	87.45	94.05	165		57.75	701.25	367.95	173.25
163.35	140.25	206.25	207.9		84.15	125.4	80.85	97.35		72.6	66	183.15			202.95	361.35	508.2	400.95
120.45	148.5	110.55	77.55		59.4	59.4	84.15	161.7		407.55	123.75	130.35	72.6		544.5	287.1	85.8	82.5
127.05	75.9	118.8	240.9		61.05		77.55	108.9		163.35	169.95	67.65	108.9		295.35	603.9	257.4	163.35
99	82.5	417.45	348.15		107.25	95.7	64.35	99		122.1	92.4	359.7	84.15		308.55	100.65	66	288.75
92.4	59.4	153.45	160.05		75.9	85.8	90.75	122.1		655.05	143.55	61.05	222.75		194.7	99	343.2	316.8
61.05	132	153.45	156.75		87.45	196.35	161.7	75.9		163.35	290.4	132	202.95		300.3	818.4	270.6	572.55
97.35	163.35	105.6	206.25		67.65	62.7	141.9	74.25		260.7	202.95	211.2	125.4		681.45	694.65	316.8	377.85
313.5	57.75	145.2	67.65		1059.3	123.75	85.8	146.85		231	123.75	273.9	87.45		433.95	412.5	400.95	313.5
122.1	146.85	155.1	193.05		232.65	153.45	189.75	64.35		166.65	113.85	143.55	229.35		608.85	481.8	122.1	132
75.9	151.8	92.4	160.05		67.65	128.7	66	148.5		2268.75	110.55	90.75	64.35		306.9	653.4	561	249.15
155.1	110.55	214.5	179.85		105.6	56.1	166.65	85.8		562.65	168.3	254.1	503.25		56.1	376.2	141.9	69.3
92.4	130.35	194.7	103.95		145.2	70.95	62.7	61.05		84.15	173.25	260.7	67.65		499.95	348.15	184.8	179.85
293.7	399.3	79.2	105.6		79.2	59.4	61.05	69.3		179.85	196.35	64.35	127.05		183.15	386.1	67.65	178.2
280.5	268.95	127.05	128.7		183.15	62.7	107.25	70.95		600.6		207.9	226.05		437.25	919.05	92.4	313.5
239.25	59.4	102.3	75.9		166.65	125.4	57.75	89.1		80.85	130.35	168.3	61.05		437.25	344.85	171.6	56.1
262.35	113.85	189.75	153.45		59.4	85.8	87.45	72.6		87.45	163.35	70.95	338.25		491.7	712.8	318.45	232.65
140.25	72.6		99		94.05	95.7	66	108.9		72.6	237.6	155.1	64.35		432.3	404.25	89.1	790.35
209.55	528	229.35	70.95		110.55	72.6	89.1	99		297	226.05	135.3	127.05		133.65	338.25	389.4	202.95
108.9	343.2	169.95	107.25		67.65	61.05	59.4	123.75		62.7	183.15	95.7	311.85		1093.95	549.45		240.9
120.45	118.8	113.85	193.05			82.5	75.9	72.6		161.7	127.05	191.4	219.45		297	414.15	349.8	242.55
108.9	166.65	224.4	74.25		75.9	186.45	80.85	166.65		75.9	108.9		160.05		435.6	463.65	358.05	602.25
113.85	115.5	74.25	169.95		103.95	69.3	79.2	267.3		125.4	297	275.55	150.15		344.85	429	196.35	402.6
95.7	174.9	141.9	242.55		57.75	82.5	85.8	133.65			102.3	82.5	206.25		1079.1	589.05	80.85	293.7
75.9	315.15	240.9	125.4		56.1	67.65	61.05	85.8		369.6	62.7	641.85	250.8		353.1	89.1	66	242.55
207.9	84.15	211.2	259.05		82.5	97.35	240.9	320.1		219.45	128.7	133.65	150.15		80.85	645.15	346.5	132
118.8	181.5	84.15	229.35		112.2	310.2	117.15	168.3		369.6	117.15	84.15	277.2		839.85	508.2	66	128.7
110.55	194.7	156.75	181.5		102.3	235.95	82.5	650.1		227.7	204.6	113.85	102.3		676.5	628.65	140.25	234.3
	113.85	138.6	135.3		77.55	72.6	231	79.2		128.7	77.55	232.65	56.1		110.55	501.6	726	92.4
136.95	77.55	235.95	171.6		138.6	56.1	57.75	255.75		227.7	344.85	87.45	221.1		130.35	186.45	343.2	278.85
67.65	72.6	77.55	191.4		64.35	77.55	136.95	254.1		82.5	120.45	196.35	56.1		371.25	374.55	108.9	610.5
95.7	123.75	84.15	125.4		64.35	57.75	77.55	280.5		257.4	252.45	130.35	429		683.1	161.7	72.6	221.1
211.2	69.3	267.3	161.7		165	89.1	136.95	79.2		105.6	62.7	181.5	295.35		232.65	297	183.15	244.2
211.2	82.5	270.6	64.35		128.7	70.95		590.7		95.7	107.25	67.65	122.1		189.75	569.25	145.2	290.4
376.2	141.9	89.1	181.5		117.15	122.1	59.4	57.75		62.7	397.65	273.9	94.05		532.95	638.55	255.75	267.3
212.85	297	173.25	92.4		99	99	235.95	92.4		105.6	204.6	316.8	67.65		201.3	851.4	186.45	229.35
160.05	79.2	346.5	77.55		108.9	95.7	156.75	80.85		120.45	90.75	402.6	69.3		56.1	353.1	407.55	268.95
231	193.05	72.6	232.65		204.6	82.5	75.9	146.85		140.25	156.75	146.85	97.35		810.15	56.1	513.15	130.35
943.8	97.35	89.1	141.9		56.1	67.65	70.95	117.15		77.55	153.45	447.15	61.05		211.2	2186.25	308.55	87.45
628.65	103.95	140.25	85.8		69.3	97.35	95.7	89.1		397.65	536.25	229.35	204.6		270.6	838.2	135.3	371.25
102.3	173.25	250.8	90.75		132	77.55	70.95	191.4		85.8	174.9	267.3	70.95		420.75	462	381.15	69.3
206.25	151.8	64.35	84.15		82.5	135.3	57.75	75.9		303.6	169.95	155.1	95.7		79.2	580.8	212.85	59.4
217.8	107.25	59.4	115.5		57.75	113.85	151.8	118.8		146.85	549.45	80.85	107.25		389.4	391.05	179.85	155.1
138.6	221.1	57.75	57.75		115.5	82.5	424.05	176.55		356.4	199.65	127.05	74.25		219.45	577.5	265.65	61.05
155.1	108.9	62.7	56.1		57.75	56.1	150.15	125.4		155.1	59.4	163.35	460.35		136.95	194.7	146.85	61.05
252.45	138.6	92.4	130.35		235.95	630.3	325.05	334.95		224.4	87.45	97.35	453.75		193.05	706.2	267.3	201.3
229.35	201.3	94.05	270.6		69.3	59.4	145.2	72.6		89.1	280.5	74.25	265.65		102.3	193.05	481.8	331.65
199.65	133.65	288.75	158.4		70.95	245.85	77.55	57.75		283.8	100.65	80.85	209.55		105.6	349.8	600.6	275.55
143.55	100.65	204.6	125.4		94.05	136.95	438.9	204.6		133.65	160.05	87.45	135.3			556.05	255.75	118.8
234.3	115.5	237.6	89.1		156.75		87.45	112.2		457.05	275.55	85.8	270.6		75.9	536.25	369.6	336.6
235.95	115.5	62.7	95.7		118.8	105.6	168.3	75.9		245.85	194.7	141.9	113.85		158.4	486.75	292.05	473.55
184.8	179.85	69.3	155.1		99	201.3	100.65	138.6		173.25	59.4	108.9	125.4		143.55	547.8	361.35	298.65
178.2	87.45	282.15	113.85		74.25	397.65	59.4	118.8		59.4	75.9	107.25	158.4		64.35	257.4	62.7	300.3
211.2	77.55	117.15	105.6		165	75.9	80.85	95.7		306.9	113.85	64.35	595.65		85.8	145.2	229.35	272.25
163.35	193.05	216.15	66		80.85	64.35	64.35	79.2		199.65	217.8	212.85	97.35		255.75	531.3	99	321.75
59.4	221.1	132	287.1		113.85	480.15	64.35			178.2	64.35	112.2	90.75		94.05	485.1	100.65	193.05
67.65	151.8	113.85	75.9		102.3	110.55	122.1	67.65		267.3	133.65	80.85	130.35		491.7	344.85	90.75	204.6
264	138.6	293.7	69.3		168.3	138.6	196.35	67.65		209.55	95.7	74.25	61.05		87.45	107.25	108.9	66
108.9	61.05	376.2	146.85		80.85	85.8	56.1	118.8		138.6	297	169.95	140.25		62.7	148.5	188.1	326.7
59.4	381.15	153.45	133.65		85.8	77.55	69.3	57.75		59.4	349.8	74.25	103.95		118.8	452.1	141.9	85.8
130.35	226.05	89.1	77.55		316.8	102.3	69.3	107.25		57.75	244.2		183.15		57.75		95.7	285.45
226.05	135.3	183.15	122.1		429	92.4	80.85	74.25		125.4	366.3		138.6		66	117.15	206.25	326.7
128.7	97.35	122.1	56.1		80.85	92.4	59.4	70.95		94.05	293.7		174.9		214.5	684.75	308.55	285.45
189.75	136.95	150.15	148.5		141.9	90.75	70.95	67.65		100.65	133.65		100.65		79.2	343.2	74.25	99
174.9	112.2	196.35	99		72.6	107.25	245.85	136.95		202.95	148.5		226.05		156.75	737.55	321.75	303.6
254.1	216.15	108.9	115.5		69.3	61.05	56.1	94.05		160.05	273.9		102.3		443.85	74.25	90.75	85.8
70.95	95.7	165	67.65		163.35	84.15	115.5	61.05		87.45	138.6		207.9		66	67.65	186.45	321.75
153.45	59.4	227.7	168.3		112.2	72.6	247.5	56.1			153.45		80.85		163.35	1168.2	72.6	171.6
498.3	151.8	118.8	74.25		72.6	122.1	344.85	57.75		74.25	125.4		85.8		217.8	99	135.3	59.4
366.3	61.05	62.7	270.6		74.25	235.95	77.55	89.1		59.4	178.2		115.5		273.9	105.6	141.9	245.85
87.45	145.2	245.85	95.7		128.7	66	250.8	92.4		72.6	67.65		193.05		430.65	94.05	323.4	90.75
232.65	166.65	61.05	79.2		80.85	92.4	56.1	793.65		191.4	148.5		107.25		315.15	118.8	130.35	103.95
219.45	82.5	95.7	237.6		57.75	97.35	72.6	79.2		194.7	97.35		219.45		103.95	693	138.6
178.2	156.75	235.95	108.9		69.3	61.05	74.25	80.85		235.95	89.1		130.35		92.4	115.5	156.75	427.35
59.4	214.5	367.95	67.65		115.5	59.4	59.4	67.65		95.7			69.3		89.1	74.25	427.35	188.1
79.2	118.8	165	92.4			64.35	74.25	67.65		62.7			138.6		245.85	70.95	67.65	300.3
	100.65	140.25				90.75	84.15	62.7					85.8		310.2	503.25	219.45	150.15
69.3	61.05	103.95	97.35			166.65	99	92.4					318.45		387.75	790.35	392.7	82.5
341.55	79.2	245.85	382.8			66	113.85	75.9					178.2		84.15	277.2	85.8	130.35
132	89.1	85.8	99			70.95	61.05	69.3					229.35		330	84.15	61.05	193.05
207.9		255.75	231			62.7	318.45	204.6					102.3		226.05	193.05	188.1	155.1
95.7	146.85	176.55	158.4			189.75	57.75	79.2					59.4		221.1	176.55	196.35	141.9
85.8	252.45	100.65	108.9			64.35	103.95	57.75					100.65		64.35	72.6	191.4	297
308.55	143.55	526.35	57.75			107.25	85.8						470.25		82.5	85.8	188.1	356.4
85.8	117.15	153.45	122.1			796.95	90.75						120.45		272.25	562.65	118.8	376.2
130.35	227.7	72.6	132			79.2	72.6						84.15		287.1	77.55	79.2	123.75
148.5	67.65	82.5	226.05			219.45	75.9								102.3	600.6	198	277.2
161.7	69.3	115.5	100.65			915.75	69.3						85.8		160.05	118.8	90.75	356.4
151.8	87.45	100.65	69.3			66	57.75						105.6		889.35	495	125.4	338.25
141.9	217.8	186.45	132			59.4	69.3						140.25		328.35	513.15	103.95	333.3
320.1	179.85	132	122.1			67.65	100.65						69.3		239.25	232.65	74.25	349.8
130.35	102.3	95.7	57.75			148.5	57.75						145.2		115.5	100.65	173.25	113.85
85.8	648.45		179.85			56.1	70.95						108.9		268.95	310.2	255.75	425.7
194.7	206.25	379.5	209.55			56.1	82.5						262.35		72.6	245.85	212.85	99
361.35	254.1	216.15	176.55			74.25							97.35		249.15	501.6	115.5	150.15
272.25	148.5	466.95	92.4			56.1	79.2						80.85		310.2	646.8	217.8	366.3
207.9	97.35	259.05	117.15			67.65	69.3						295.35		201.3	268.95	168.3	97.35
186.45	102.3	211.2	97.35			110.55	290.4						326.7		125.4	160.05	414.15	133.65
64.35	224.4	214.5	100.65			82.5	255.75						207.9		56.1	455.4	118.8	366.3
255.75	199.65	358.05	138.6			163.35	179.85						232.65		323.4	194.7	270.6	574.2
493.35	145.2	69.3	163.35			123.75	95.7						97.35		66	346.5	264	202.95
316.8	386.1	122.1	181.5			59.4	189.75						57.75		366.3	166.65	288.75	221.1
67.65	184.8	141.9	74.25			62.7	57.75						72.6		363	222.75	193.05	321.75
57.75	105.6	206.25	136.95				145.2						57.75		442.2	174.9	391.05	99
212.85	346.5	457.05	132				103.95						153.45		102.3	1056	298.65	301.95
135.3	151.8	118.8	90.75				89.1						387.75		110.55	127.05	84.15	115.5
168.3	80.85	141.9	80.85				539.55						211.2		67.65	168.3	224.4	72.6
399.3	87.45	141.9	128.7				85.8						145.2		184.8	130.35	69.3	447.15
140.25	89.1	318.45	90.75				66						448.8		75.9	226.05	201.3	526.35
202.95	69.3	232.65	67.65				56.1						69.3		125.4	123.75	64.35	117.15
120.45	122.1	280.5	189.75				97.35						133.65		217.8	270.6	224.4	87.45
148.5	70.95	179.85	61.05				64.35						72.6		178.2	245.85	229.35	247.5
516.45	275.55	69.3	135.3				61.05						74.25		80.85	339.9	82.5	455.4
339.9	84.15	75.9	67.65				92.4						110.55		117.15	221.1	353.1	397.65
156.75	61.05	57.75	108.9				74.25						67.65		136.95	272.25	356.4	460.35
59.4	161.7	221.1	105.6				173.25						75.9		161.7	417.45	589.05	97.35
84.15	64.35	214.5	67.65				61.05						75.9		382.8	141.9	318.45	392.7
128.7	90.75	82.5	216.15				132						424.05		94.05	301.95	239.25	1729.2
99	122.1	115.5	207.9				85.8						278.85		61.05	915.75	607.2	523.05
112.2	184.8	273.9	72.6				69.3						57.75		224.4	582.45	75.9	107.25
110.55	118.8	136.95	321.75				56.1						280.5		66	539.55	95.7	292.05
207.9	429	136.95	173.25				67.65						217.8		105.6	150.15	353.1	107.25
133.65	108.9	166.65	330				56.1						122.1		183.15	183.15	280.5	135.3
136.95	74.25	249.15	122.1				57.75						358.05		207.9	478.5	278.85	740.85
99	255.75	130.35	122.1				70.95						87.45		221.1	367.95	422.4	219.45
283.8	105.6	169.95	206.25				77.55						67.65			138.6	209.55	303.6
194.7	541.2	196.35	133.65				138.6						138.6		402.6	354.75	585.75	2016.3
62.7	132	595.65	56.1				117.15						95.7		135.3	278.85	95.7	346.5
67.65	61.05	306.9	330				89.1						199.65		947.1	80.85	163.35	193.05
194.7	153.45	69.3	184.8				128.7						287.1		89.1	379.5	103.95	305.25
99	250.8	110.55	353.1				318.45						136.95		61.05	171.6	305.25	2385.9
181.5	206.25	196.35	105.6				112.2						138.6		224.4	1239.15	633.6	409.2
181.5	102.3	250.8	179.85				77.55						100.65		267.3	85.8	222.75	194.7
255.75	165	468.6	328.35				61.05						174.9		62.7	77.55	186.45	311.85
191.4	145.2	231	107.25				118.8						130.35		97.35	333.3	113.85	186.45
95.7	59.4	267.3	94.05				97.35						117.15		103.95	501.6	227.7	298.65
94.05	85.8	321.75	166.65				191.4						165		681.45	275.55	191.4	528
85.8	75.9	90.75	363				77.55						183.15		123.75	394.35	173.25	293.7
226.05	132	127.05	92.4				112.2						199.65		561	270.6	290.4	823.35
165	255.75	231	202.95				92.4						186.45		285.45	231	343.2	773.85
438.9	273.9	237.6	212.85				117.15						135.3		602.25	244.2	298.65	356.4
432.3	163.35	74.25	127.05										640.2		476.85	313.5	257.4	298.65
74.25	64.35	151.8	196.35										140.25		297	222.75	343.2	590.7
123.75	84.15	212.85	153.45										66		600.6	207.9	234.3	186.45
79.2	138.6	160.05	169.95										288.75		303.6	552.75	333.3	985.05
367.95	216.15	356.4	77.55		135.3	183.15	67.65	206.25					80.85		640.2	87.45	165	976.8
67.65	84.15	59.4	257.4		138.6	117.15	267.3	151.8					92.4		384.45	249.15	173.25	290.4
221.1	117.15	214.5	75.9		103.95	330	328.35	300.3					99		224.4	92.4	122.1	463.65
62.7	100.65	288.75	130.35		74.25	280.5	531.3	89.1					278.85		334.95	361.35		252.45
130.35	465.3	325.05	113.85		94.05	140.25	153.45	56.1					127.05		414.15	617.1	100.65	298.65
92.4	318.45	386.1	57.75		56.1	64.35	59.4	191.4					234.3		247.5	300.3	141.9	717.75
171.6	92.4	293.7	115.5		155.1	127.05	165	59.4					115.5		140.25	278.85	84.15	283.8
125.4	193.05	77.55	146.85		122.1	123.75	204.6	122.1					219.45		488.4	90.75	85.8	523.05
232.65	300.3	206.25	138.6		103.95	222.75	95.7	610.5					59.4		806.85	349.8	495	556.05
	66	100.65	217.8		112.2	244.2	105.6	135.3					77.55		417.45	143.55	795.3	107.25
678.15	75.9		226.05		70.95	219.45	306.9	174.9							326.7	242.55	316.8	136.95
318.45	94.05	452.1	264		140.25	156.75	333.3	201.3					107.25		95.7	150.15	110.55	282.15
66	102.3	127.05	214.5		150.15	128.7	141.9	201.3					102.3		301.95	92.4	103.95	117.15
59.4	85.8	59.4	168.3		135.3	173.25	252.45	432.3					87.45		679.8	1153.35	173.25	94.05
755.7	94.05	156.75			72.6	211.2	87.45	412.5					179.85		379.5	295.35	221.1	178.2
72.6	89.1	84.15	222.75		102.3	282.15	188.1	138.6					110.55		89.1	183.15	239.25	359.7
123.75		57.75	235.95		85.8	77.55	113.85	155.1					234.3		297	663.3	82.5	702.9
113.85	191.4	143.55	107.25		202.95	135.3	161.7	237.6					70.95		275.55	262.35	323.4	392.7
184.8	85.8	186.45	221.1		97.35	179.85	465.3	306.9					115.5		432.3	1833.15	300.3	209.55
95.7	125.4	181.5	99		155.1	95.7	227.7	221.1					89.1		132	133.65	90.75	288.75
433.95	158.4	273.9	198		57.75	161.7	475.2	206.25					145.2		204.6	594	364.65	156.75
62.7	226.05	242.55	145.2		67.65	156.75	183.15	57.75					169.95		498.3	61.05	239.25	204.6
330	80.85	117.15	115.5		122.1	199.65	112.2	80.85					84.15		612.15	273.9	557.7	123.75
160.05	292.05	354.75	153.45		132	313.5	450.45	123.75					146.85		577.5	226.05	275.55
94.05	99	280.5	153.45		140.25	127.05	212.85	123.75					122.1		854.7	219.45	331.65
122.1	82.5	168.3	171.6		136.95	561	320.1	298.65					90.75		414.15	82.5	89.1
516.45	202.95	136.95	89.1		64.35	130.35	85.8	351.45					280.5		173.25	56.1	499.95
102.3	212.85	216.15	260.7		257.4	257.4	174.9	143.55					57.75		349.8	201.3	102.3
84.15	72.6	118.8	138.6		105.6	77.55	66	249.15					217.8		82.5	310.2	369.6
133.65	70.95	82.5	176.55		141.9	138.6	113.85	118.8					57.75		105.6	250.8	366.3
136.95	202.95	678.15	61.05		136.95	339.9	409.2	85.8					69.3		310.2	82.5	229.35
112.2	206.25	102.3	92.4		102.3	143.55	288.75	155.1					346.5		189.75		277.2
267.3	354.75	113.85	133.65		61.05	138.6	250.8	331.65					122.1		605.55	202.95	498.3
120.45	209.55	62.7	250.8		75.9	117.15	92.4	130.35					61.05		89.1	475.2	234.3
135.3	110.55	107.25	285.45		89.1	232.65	321.75	80.85					211.2		196.35	361.35	280.5
222.75	67.65	141.9	85.8		107.25	59.4	79.2	127.05					75.9		371.25	89.1	72.6
64.35	115.5	194.7	97.35		348.15	270.6	108.9	176.55					191.4		206.25	92.4	273.9
138.6	145.2	62.7	298.65		82.5	108.9	214.5	57.75					95.7		66	64.35	146.85
136.95	292.05	165	160.05		209.55	82.5	330	201.3					184.8		146.85	300.3	206.25
399.3	189.75	61.05	89.1		59.4	138.6	130.35	260.7					313.5		331.65	397.65	410.85
297	140.25	191.4	135.3		67.65	153.45	688.05	113.85					341.55		67.65	237.6	94.05
211.2	59.4	115.5	554.4		120.45	118.8	133.65	56.1					64.35		108.9	136.95	250.8
113.85	409.2	70.95	168.3		90.75	325.05	437.25	128.7					108.9		143.55	70.95	485.1
331.65	128.7	117.15	92.4		62.7	336.6	105.6	151.8					85.8		315.15	458.7	57.75
214.5	194.7	99	245.85		128.7	272.25	239.25	117.15					212.85		303.6	330	399.3
196.35	260.7	64.35	102.3		75.9	113.85	293.7	61.05					67.65		67.65	420.75	265.65
235.95	148.5	87.45	165		130.35	297	146.85	95.7					120.45		168.3	668.25	57.75
272.25	143.55	135.3	163.35		117.15	57.75	107.25	100.65					95.7		615.45	69.3	455.4
240.9	156.75	135.3	178.2		209.55	97.35	127.05	94.05					148.5		150.15	113.85	374.55
146.85	358.05	120.45	107.25		69.3	62.7	130.35	74.25					130.35		62.7	168.3	400.95
239.25	168.3	120.45	183.15		64.35	221.1	166.65	105.6					118.8		62.7	427.35	429
254.1	75.9	130.35	224.4		94.05	61.05	186.45	169.95					320.1		244.2	150.15	391.05
105.6	313.5	311.85	823.35		184.8	143.55	234.3	132					122.1		57.75	334.95	325.05
158.4	412.5	102.3	181.5		67.65	62.7	145.2	115.5							782.1	364.65	450.45
117.15	297	146.85	72.6		92.4		150.15	66					130.35		313.5	410.85	359.7
158.4	397.65	128.7	136.95		64.35	183.15	108.9	118.8					181.5		346.5	562.65	297
61.05	455.4	103.95	186.45		110.55	62.7	59.4	151.8					100.65		125.4	62.7	196.35
511.5	64.35	133.65	117.15		193.05	141.9	70.95	194.7					141.9		432.3	160.05	514.8
128.7	57.75	120.45	95.7		132	561	330	66					82.5		188.1	232.65	146.85
694.65	107.25	173.25	328.35		57.75	562.65	260.7	120.45					64.35		61.05	541.2	351.45
237.6	130.35	70.95	118.8		77.55	234.3	107.25	227.7					250.8		627	249.15	300.3
212.85	199.65	151.8	67.65		118.8	74.25	143.55	288.75					89.1		303.6	166.65	463.65
82.5	169.95	72.6	288.75		85.8	259.05	186.45	132					102.3		422.4	660	107.25
255.75	132	145.2	135.3		113.85	358.05	292.05	79.2					168.3		84.15	339.9	564.3
64.35	117.15	84.15	156.75		97.35	259.05	320.1	94.05					268.95		221.1	148.5	318.45
376.2	75.9	85.8	264		92.4	163.35	66	123.75					176.55		188.1	990	97.35
135.3	117.15	67.65	168.3		92.4	70.95	112.2						156.75		473.55	374.55	169.95
222.75	125.4	97.35	250.8		82.5	118.8	69.3	169.95					161.7		161.7	278.85	178.2
77.55	66	178.2	122.1		120.45	82.5	57.75	231					136.95		85.8	97.35	372.9
381.15	201.3	90.75	92.4		202.95	387.75	122.1	158.4					105.6		219.45	491.7	810.15
115.5	74.25	268.95	178.2		155.1	125.4	64.35	372.9					138.6		437.25	316.8	242.55
183.15	110.55	77.55	161.7		103.95	82.5		140.25					169.95		425.7	184.8	135.3
67.65	115.5	158.4	72.6		102.3	85.8	135.3	130.35					240.9		138.6	539.55	356.4
85.8	173.25	64.35	194.7		135.3	122.1	95.7	148.5					82.5		196.35	536.25	430.65
75.9	252.45	57.75	141.9		67.65	249.15	87.45	140.25					135.3		980.1	196.35	115.5
95.7	290.4	95.7	82.5		113.85	122.1	320.1	141.9					181.5		221.1	130.35	82.5
132	132	160.05	122.1		95.7	123.75	457.05	64.35					103.95		176.55	524.7	270.6
	160.05	92.4	224.4		74.25	132	285.45	231					69.3		298.65	209.55	100.65
	270.6		221.1		62.7	199.65	198	61.05					178.2			95.7	97.35
	130.35	207.9	163.35		107.25	110.55	257.4	229.35					188.1			264	136.95
	100.65	140.25	92.4		56.1	59.4	97.35	132					216.15			150.15	82.5
		174.9	249.15		92.4	303.6	57.75	168.3					117.15			265.65	610.5
	79.2	85.8	186.45		61.05	226.05	318.45	156.75					70.95			325.05	89.1
	531.3	151.8	70.95		69.3	89.1	118.8	77.55					226.05			132	584.1
	90.75	150.15	72.6		82.5	103.95	127.05	174.9					356.4			209.55	344.85
	153.45	202.95	102.3		77.55	305.25	198	108.9					75.9				252.45
	117.15	70.95	179.85		84.15	107.25	257.4	132					270.6				201.3
	72.6	151.8	216.15			425.7	56.1	107.25					217.8				136.95
	113.85	188.1	87.45		66	130.35	260.7	59.4					94.05				438.9
	902.55	112.2	89.1		125.4	298.65	250.8	231					202.95				493.35
	315.15	231			92.4	94.05	95.7	72.6					113.85				188.1
	595.65	145.2	174.9		67.65	366.3	268.95	82.5					173.25				95.7
	72.6	84.15	59.4		87.45	74.25	206.25	110.55					254.1				468.6
	155.1	67.65	297		85.8	70.95	105.6	108.9					85.8				199.65
	112.2	198	151.8		66	171.6	242.55	110.55					235.95				245.85
	211.2	214.5	90.75		80.85	69.3	168.3	120.45					250.8				384.45
	193.05	198	280.5		70.95	364.65	198	163.35					204.6				163.35
	264	153.45	133.65		69.3	105.6	242.55	61.05					84.15				1489.95
	234.3	174.9	140.25		165	128.7	275.55	141.9					130.35				69.3
	262.35	184.8	169.95		84.15	212.85	273.9	224.4					95.7				466.95
	92.4	69.3	148.5		107.25	85.8	57.75	204.6					265.65				118.8
	92.4	148.5	183.15		89.1	113.85	148.5	97.35					211.2				536.25
	64.35	311.85	321.75		79.2	290.4	94.05	181.5					351.45				176.55
	275.55	178.2	328.35		141.9	105.6	140.25	118.8					158.4				339.9
	59.4	275.55	173.25		92.4	204.6	132	57.75					468.6				349.8
	141.9	102.3	57.75		66		204.6	178.2					135.3				359.7
	132	168.3	173.25		72.6	66	79.2	84.15					173.25				369.6
	882.75	82.5	254.1		120.45	285.45	148.5	145.2					184.8				361.35
	97.35	80.85	199.65		99	112.2	135.3	103.95					168.3				556.05
	110.55	264	107.25		103.95	66	570.9	82.5					259.05				691.35
	87.45	56.1	99		66	207.9	80.85	450.45					94.05				579.15
	105.6	127.05	133.65		84.15	57.75	359.7	204.6					146.85				803.55
	120.45	110.55	82.5		105.6	74.25	336.6	94.05					331.65				556.05
	214.5	184.8	136.95		59.4	74.25	242.55	268.95					87.45				326.7
	110.55	92.4	130.35		94.05	72.6	107.25	79.2					135.3				191.4
	87.45	207.9	176.55		64.35	189.75	369.6	67.65					141.9				412.5
	102.3	84.15	110.55		84.15	105.6	85.8	283.8					75.9				196.35
	107.25	168.3	153.45		56.1	95.7	297	303.6					198				343.2
	194.7	270.6	206.25		117.15	57.75	387.75	97.35					90.75				216.15
	358.05	127.05	102.3		95.7	161.7	217.8	89.1					808.5				539.55
	110.55	69.3	277.2		59.4	107.25	453.75	173.25					146.85				231
	399.3	136.95	249.15		62.7	143.55	105.6	141.9					89.1				171.6
	155.1	153.45	103.95		61.05	62.7	244.2	70.95					221.1				259.05
	202.95	118.8	105.6		105.6	85.8	120.45	80.85					103.95
	163.35	61.05	161.7		118.8	234.3	244.2	105.6					181.5
	132	273.9	128.7		69.3	117.15	234.3	202.95					158.4
	97.35	227.7	207.9		66	155.1	155.1	133.65					161.7
	117.15	117.15	118.8		120.45	128.7	165	61.05					115.5
	260.7	191.4	94.05		136.95	87.45	153.45	79.2					112.2
	70.95	166.65	82.5		62.7	94.05	473.55	87.45					95.7
	122.1	70.95	99		153.45	85.8	443.85	102.3					480.15
	74.25	128.7	70.95		103.95	64.35	99	156.75					110.55
		136.95	163.35		70.95	123.75	64.35	69.3					118.8
	270.6	130.35	156.75		103.95	202.95	198	102.3					161.7
	179.85	74.25	127.05		94.05	72.6	326.7	224.4					59.4
	122.1	143.55	72.6		196.35	176.55	151.8	140.25
	125.4	173.25	364.65		163.35	56.1	115.5	148.5
	234.3	303.6	102.3		103.95	74.25		231
	146.85	196.35	77.55		92.4	409.2	133.65	132		282.15	221.1	112.2	239.25		80.85	156.75	264	133.65
	270.6	85.8	128.7		59.4	252.45	148.5	117.15		85.8	135.3	145.2	123.75		100.65	257.4	82.5	153.45
	100.65	57.75	140.25		70.95	80.85	95.7	181.5		165	82.5	295.35	146.85		74.25	193.05	161.7	212.85
	90.75	99	103.95		75.9	87.45	151.8	118.8		202.95	227.7	278.85	260.7		97.35	72.6	303.6	90.75
	94.05	165	72.6		77.55	592.35	250.8	165		82.5	135.3	569.25	227.7		62.7	80.85	100.65	356.4
	69.3	199.65	138.6		160.05	204.6	150.15	79.2		214.5	61.05	422.4	229.35		112.2	56.1	108.9	102.3
	69.3	66	161.7		99	100.65	199.65	135.3		163.35	381.15	140.25	87.45		64.35	135.3	135.3	105.6
	90.75	105.6	113.85		145.2	222.75	70.95	145.2		402.6	100.65	396	84.15		66	166.65	130.35	166.65
	90.75	95.7	100.65		64.35	188.1	120.45	128.7		227.7	161.7	178.2	150.15		62.7	171.6	300.3	128.7
	135.3	387.75	113.85		84.15	168.3	212.85	74.25		176.55	108.9	133.65	103.95		123.75	201.3	148.5	74.25
	209.55	207.9	125.4		97.35	173.25	69.3	56.1		61.05	318.45	140.25	503.25		103.95	100.65	429	56.1
	174.9	69.3	110.55		102.3	59.4	118.8	285.45		285.45	235.95	267.3	460.35		148.5	72.6	132	381.15
	110.55	165	72.6		107.25	146.85	127.05	138.6		99	293.7	133.65	349.8		67.65	56.1	61.05	59.4
	67.65	89.1			158.4	57.75	56.1	283.8		103.95	557.7	199.65	212.85		94.05	168.3	244.2	107.25
	74.25	115.5			57.75	341.55	132	110.55		103.95	97.35	130.35	234.3		57.75	103.95	260.7	257.4
	103.95				99	77.55	156.75	102.3		226.05	227.7	196.35	66		97.35	176.55	326.7	249.15
	166.65				74.25	132	165	56.1		151.8	123.75	584.1	181.5		181.5	153.45	523.05	202.95
	169.95				66	178.2	122.1	56.1		211.2	158.4	349.8	72.6		313.5	165	229.35	262.35
	102.3				155.1	118.8	89.1	80.85		277.2	394.35	80.85	133.65		82.5	133.65	481.8	143.55
	221.1				115.5	59.4	118.8	82.5		113.85	67.65	181.5	334.95		410.85	57.75	343.2	85.8
	290.4				161.7	156.75	153.45	80.85		84.15	366.3	92.4	155.1		202.95	61.05	125.4	130.35
	100.65				85.8	174.9	82.5	85.8		562.65	79.2	103.95	141.9		376.2	252.45	211.2	125.4
	295.35				136.95	211.2	77.55	102.3		163.35	268.95	132	151.8		90.75	94.05	381.15	128.7
	163.35				115.5	174.9	169.95	77.55		318.45	84.15	99	155.1		85.8	84.15	94.05	97.35
	275.55				95.7	268.95	84.15	82.5		123.75	84.15	56.1	217.8		287.1	168.3	315.15	84.15
	117.15				186.45	202.95	113.85			72.6	169.95	212.85	181.5		102.3	145.2	165	239.25
	127.05				87.45	128.7	188.1			67.65	278.85	351.45	160.05		201.3	94.05	430.65	57.75
	145.2					191.4	89.1			165	140.25	320.1	57.75		102.3	56.1	143.55	178.2
	132				113.85	67.65	79.2			113.85	201.3	217.8	148.5		72.6	67.65	135.3	194.7
	168.3				140.25	87.45	84.15			90.75	244.2	153.45	193.05		77.55	122.1	59.4	94.05
	191.4				176.55	235.95	103.95			283.8	193.05	97.35	214.5		74.25	108.9	122.1	120.45
	148.5				105.6	128.7	143.55			250.8	265.65	67.65	117.15		338.25	57.75	232.65	214.5
	97.35				80.85	198	105.6			178.2	160.05	140.25	235.95		321.75	153.45	254.1	110.55
	283.8				165	127.05	72.6			267.3	110.55	402.6	204.6		201.3	181.5	141.9	603.9
	59.4				70.95	69.3	97.35			77.55	410.85	328.35	132		132	75.9	135.3	414.15
	229.35				417.45	155.1	107.25			359.7	84.15	275.55	249.15		145.2	74.25	410.85	70.95
	866.25				77.55	62.7	123.75			120.45	123.75	186.45	244.2		127.05	85.8	235.95	168.3
	67.65				288.75	247.5	122.1			136.95	64.35	161.7	179.85		82.5	89.1	57.75	80.85
	62.7				79.2	117.15	56.1			174.9	156.75	298.65	181.5		138.6	66	127.05	61.05
	66				214.5	80.85	66			84.15	310.2	85.8	105.6		389.4	84.15	150.15	181.5
	165				103.95	84.15	70.95			150.15	94.05	240.9	316.8		102.3	87.45	219.45	600.6
	338.25				80.85		155.1			173.25	143.55	69.3	99		455.4	67.65	87.45	231
	95.7				61.05	67.65	84.15			232.65	123.75	561	130.35		87.45	150.15	212.85	132
	273.9				57.75	57.75	156.75			82.5	61.05	184.8	235.95		298.65	80.85	138.6	301.95
	66				245.85	447.15	89.1			174.9	181.5	136.95	150.15		394.35	90.75	498.3	138.6
	130.35				103.95	66	193.05			273.9	300.3	422.4	174.9		166.65	100.65	158.4	61.05
	151.8				84.15	264	161.7			176.55	207.9	255.75	150.15		308.55	107.25	82.5	212.85
	145.2				75.9	128.7	364.65			132	161.7	565.95	392.7		133.65	272.25	132	178.2
	216.15				136.95	66	202.95			118.8	226.05	115.5	125.4		272.25	70.95	224.4	199.65
	118.8				148.5	132	117.15			227.7	90.75	198	179.85		379.5	191.4	168.3	64.35
	141.9				66	120.45	70.95			359.7	140.25	227.7	151.8		199.65	97.35	77.55	179.85
	226.05				72.6	74.25	186.45			79.2	590.7	353.1	103.95		141.9	179.85	249.15	179.85
	90.75				59.4	95.7	108.9			75.9	311.85	97.35	103.95		679.8	146.85	146.85	178.2
	95.7				94.05	69.3	62.7			379.5	56.1	338.25	211.2		280.5	64.35	59.4	219.45
	179.85				204.6	70.95	113.85			169.95	97.35	107.25	66		66	130.35	57.75	176.55
	262.35				181.5	113.85	117.15			397.65	107.25	66	57.75		79.2	94.05	127.05	169.95
	57.75				64.35	117.15	80.85			397.65	74.25	207.9	87.45		150.15	108.9	303.6	326.7
	100.65				89.1	186.45	59.4			153.45	155.1	108.9	87.45		97.35	138.6	201.3	420.75
	70.95				72.6	179.85	443.85			549.45	278.85	452.1	80.85		186.45	141.9	150.15	84.15
	150.15				278.85	351.45	80.85			372.9	155.1	176.55	176.55		69.3	120.45	141.9	176.55
	457.05				138.6	211.2	113.85			255.75	107.25	158.4	122.1		82.5	135.3	69.3	128.7
	308.55				67.65	211.2	84.15			217.8	123.75	216.15	151.8		64.35	267.3	127.05	303.6
	117.15				100.65	59.4	80.85			90.75	69.3	84.15	226.05		79.2	57.75		186.45
	107.25				57.75	113.85	117.15			420.75	231	115.5	118.8			117.15	87.45	402.6
	117.15				77.55	122.1	72.6			95.7	113.85	135.3	255.75		344.85	113.85	125.4	115.5
	546.15				117.15	82.5				84.15	184.8	110.55	211.2		194.7	348.15	186.45	161.7
	158.4				122.1	130.35	118.8			184.8		103.95	66		125.4	85.8	75.9	94.05
	165				107.25	89.1	156.75			344.85	61.05	163.35	85.8		95.7	244.2	367.95	118.8
	209.55				57.75	245.85	155.1			207.9	226.05	193.05	171.6		84.15	59.4	69.3	127.05
	165				59.4	80.85	356.4			127.05	179.85	74.25	67.65		156.75	56.1	211.2	110.55
	207.9				80.85	156.75	315.15			62.7	240.9	95.7			219.45	115.5	130.35	268.95
	75.9				56.1	169.95	128.7			166.65	448.8	387.75	80.85		112.2	69.3	183.15	72.6
	173.25				66	110.55	229.35			108.9	163.35	59.4	108.9		169.95	75.9	59.4	201.3
	191.4					260.7	75.9			226.05	128.7	59.4	85.8		166.65	110.55	70.95	132
	69.3				212.85	59.4	108.9			143.55	465.3	100.65	128.7		107.25	89.1	277.2	72.6
					67.65	69.3	118.8			133.65	140.25	90.75	59.4		66	262.35	61.05	240.9
					163.35	122.1	173.25			216.15	125.4	321.75	148.5		82.5	301.95	298.65	100.65
					123.75	204.6	135.3			224.4	176.55	80.85	171.6		221.1	222.75	207.9
					328.35	145.2	113.85				186.45	141.9	135.3		117.15	115.5	198	90.75
57.75	69.3	67.65	97.35		163.35	64.35	171.6			128.7	201.3		283.8		168.3	141.9	287.1	760.65
61.05	158.4	90.75	85.8		166.65	103.95	79.2			173.25	297	174.9	69.3		80.85	278.85	123.75	153.45
181.5	168.3	112.2	181.5		89.1	82.5	141.9			145.2	356.4	531.3	181.5		64.35	112.2	315.15	80.85
59.4	61.05	57.75	125.4		64.35	168.3	264			278.85	206.25	224.4	141.9		102.3	67.65	102.3	80.85
87.45	178.2	67.65	94.05		64.35	153.45	97.35			166.65	409.2	546.15	181.5		163.35	168.3	280.5	82.5
57.75	74.25	207.9	89.1		229.35	72.6	115.5			123.75	153.45	161.7	193.05		80.85	70.95	140.25	179.85
66	59.4	92.4	64.35		209.55	77.55	211.2			191.4	194.7	146.85	194.7		120.45	115.5	120.45	156.75
171.6	70.95	82.5	67.65		99	173.25	191.4			140.25	150.15	120.45	130.35		75.9	219.45	285.45	141.9
70.95	74.25	112.2	90.75		67.65	136.95	212.85			481.8	62.7	247.5	165		264	82.5	97.35	97.35
59.4	77.55	62.7	75.9		219.45	87.45	64.35			499.95	176.55	89.1	56.1		209.55	115.5	349.8	171.6
64.35	72.6	151.8	156.75		178.2	92.4	209.55			132	382.8	113.85	67.65		156.75	79.2	56.1	84.15
72.6	66	56.1	127.05		82.5	199.65	219.45			72.6	249.15	120.45	155.1		135.3		57.75	112.2
85.8	199.65	70.95	87.45		178.2	82.5	189.75			102.3	262.35	292.05	135.3		158.4	105.6	193.05	189.75
87.45	64.35	123.75	75.9		97.35	115.5	160.05			377.85	318.45	136.95	89.1		150.15	283.8	160.05	178.2
66	67.65	107.25	84.15		115.5	148.5	546.15			226.05	214.5	84.15	117.15		202.95	125.4	410.85	232.65
166.65	79.2	135.3	113.85		174.9	100.65	189.75			108.9	151.8	338.25	107.25		290.4	189.75	136.95	419.1
87.45	56.1	128.7	84.15		75.9	103.95	95.7			99	163.35	84.15	67.65		67.65	183.15	141.9	377.85
123.75	105.6	95.7	273.9		115.5	188.1	123.75			338.25	107.25	250.8	232.65		122.1	57.75	127.05	61.05
115.5	99	66	61.05		77.55	145.2	198			132	249.15	59.4	135.3		113.85	194.7	235.95	227.7
74.25	87.45	69.3	130.35		99	155.1	165			158.4	280.5	100.65	179.85		97.35	293.7	156.75	103.95
61.05	193.05	64.35	77.55		133.65	74.25	466.95			374.55	221.1	117.15	110.55		107.25	268.95	179.85	115.5
179.85	191.4	108.9	82.5		108.9	57.75	166.65			189.75	92.4	254.1	217.8		97.35	118.8	285.45	125.4
79.2	57.75	103.95	118.8		120.45	188.1	130.35			151.8	204.6	84.15	178.2		138.6	66	102.3	153.45
97.35	77.55	113.85	75.9		66	110.55	62.7			72.6	146.85	298.65	150.15		171.6	113.85	112.2	130.35
108.9	84.15	72.6	62.7		120.45	151.8	305.25			66	221.1	85.8	107.25		115.5	140.25	125.4	87.45
275.55	297	95.7	267.3		151.8	84.15	143.55			202.95	333.3	120.45	282.15		128.7	80.85	216.15	151.8
87.45	61.05	79.2	100.65		128.7	169.95	338.25			235.95	143.55	108.9	105.6		199.65	80.85	209.55	69.3
62.7	132	66	92.4		235.95	235.95	214.5			348.15	262.35	92.4	430.65		471.9	102.3	150.15	245.85
61.05	102.3	135.3	278.85		92.4	249.15	176.55			188.1	226.05	150.15	381.15		128.7	222.75	509.85	103.95
125.4	82.5	151.8	90.75		239.25	66	90.75			462	285.45	209.55	77.55		409.2	244.2	181.5	838.2
67.65	128.7	79.2	161.7		74.25	74.25	239.25			240.9	64.35	244.2	138.6		110.55	120.45	310.2	153.45
62.7	75.9	70.95	62.7		136.95	188.1	244.2			452.1	113.85	125.4	199.65		396	123.75	135.3	103.95
140.25	146.85	57.75	105.6		74.25	158.4	211.2			171.6	130.35	204.6	99		130.35	231	264	219.45
66	72.6	84.15	79.2		70.95	89.1	117.15			297	201.3	82.5	64.35		89.1	184.8	117.15	176.55
	82.5	117.15	77.55		84.15	75.9	80.85			165	227.7	75.9	105.6		178.2	85.8	67.65	143.55
90.75	103.95	67.65	165		69.3	92.4	127.05			216.15	117.15	136.95			69.3	127.05		204.6
70.95	75.9	85.8	183.15		57.75	108.9	118.8			160.05	186.45	102.3	282.15		171.6	277.2	653.4	138.6
82.5	61.05	74.25	56.1		158.4	97.35	110.55			259.05	310.2	235.95	173.25		603.9	150.15	92.4	120.45
80.85	85.8	92.4	135.3		169.95		85.8			87.45	301.95	189.75	153.45		259.05	171.6	366.3	85.8
103.95	107.25	115.5	74.25		196.35		136.95			250.8	120.45	69.3	267.3		173.25	226.05	455.4	204.6
61.05	94.05	102.3	69.3		94.05		103.95			59.4	132	163.35	150.15		61.05	136.95	105.6	70.95
82.5	145.2	110.55	62.7		359.7		239.25			115.5	127.05	120.45	188.1		56.1	72.6	244.2	334.95
186.45	89.1				79.2		386.1			209.55	99	59.4	198			67.65	66	105.6
117.15	227.7	283.8	92.4		85.8		113.85			122.1	80.85	364.65	67.65		196.35	219.45	161.7	110.55
66	123.75	133.65	186.45		120.45		97.35			120.45	292.05	207.9	275.55		64.35	136.95	163.35	97.35
56.1	62.7	57.75	70.95		323.4		191.4			207.9	94.05	130.35	193.05		61.05	174.9	80.85	133.65
57.75	143.55	74.25	75.9		66		247.5			135.3	99	333.3	151.8		72.6	148.5	275.55	226.05
128.7	163.35	92.4	165		77.55		171.6			138.6	194.7	155.1	146.85		158.4	84.15	64.35	123.75
85.8	239.25	79.2	57.75		56.1		399.3			110.55	277.2	56.1	186.45		89.1	66	186.45	133.65
107.25	75.9	108.9	67.65		125.4		224.4			262.35	103.95	158.4	244.2		77.55	202.95	290.4	155.1
99	61.05	295.35	166.65		217.8		212.85			145.2	92.4	255.75	552.75		64.35	64.35	173.25	138.6
67.65	194.7	102.3	305.25		72.6		179.85			125.4	94.05	112.2	174.9		94.05	72.6	112.2	112.2
74.25	69.3	94.05	160.05		135.3		82.5			153.45	359.7	74.25	100.65		132	146.85	206.25	217.8
66	80.85	158.4	196.35		199.65		61.05			453.75	135.3	136.95	100.65		125.4	155.1	242.55	64.35
74.25	359.7	140.25	69.3		204.6		75.9			283.8	110.55	265.65	455.4		136.95	102.3	89.1	89.1
110.55	102.3	89.1	80.85		95.7		216.15			202.95	145.2	148.5	70.95		259.05	100.65	226.05	113.85
272.25	82.5	99	57.75		153.45		82.5			130.35	244.2	217.8	92.4		75.9	150.15	57.75	193.05
72.6	87.45	214.5	84.15		580.8		133.65			74.25	234.3	110.55	163.35		61.05	108.9	125.4	100.65
62.7	79.2	79.2	108.9		132		123.75			87.45	74.25	178.2	178.2		95.7	118.8	85.8	99
94.05	622.05	57.75	117.15		67.65		255.75			524.7	90.75	475.2	161.7		79.2	138.6	138.6	150.15
112.2	146.85	70.95	92.4		148.5		143.55			249.15	89.1	112.2	199.65		184.8	306.9	221.1	82.5
80.85	402.6	74.25	382.8		80.85		193.05			452.1	115.5	491.7	57.75		168.3	288.75	415.8	245.85
184.8	70.95	74.25	120.45		69.3		72.6			259.05	66	112.2	179.85		699.6	79.2	209.55	132
95.7	66	102.3	250.8		57.75		123.75			179.85	64.35	138.6	90.75		219.45	193.05	97.35	69.3
74.25	74.25	66	85.8		62.7		153.45			399.3		99	70.95		100.65	102.3	128.7	239.25
107.25		105.6	67.65		158.4					224.4	278.85	491.7	103.95		118.8	128.7	148.5	217.8
150.15	112.2	66	64.35		87.45					70.95	209.55	107.25	315.15		211.2	125.4	145.2	265.65
57.75	168.3	62.7	61.05		84.15					122.1	141.9	417.45	306.9		84.15	201.3	102.3	165
130.35	618.75	67.65	70.95		120.45					224.4	382.8	56.1	136.95		169.95	69.3	174.9	75.9
66	103.95	90.75	77.55		128.7					227.7	458.7	320.1	105.6		69.3	59.4	169.95	188.1
209.55	80.85	120.45	87.45							193.05	212.85	151.8	226.05		145.2	480.15	67.65	89.1
62.7	59.4	67.65								128.7	158.4	110.55	191.4		128.7	155.1	61.05	179.85
72.6	240.9	67.65	72.6							178.2	249.15	145.2	165		427.35	240.9	130.35	301.95
160.05	99	117.15	61.05							82.5	199.65	146.85	181.5		112.2	244.2	268.95	118.8
70.95	66	72.6	87.45							245.85	221.1	107.25	153.45		285.45	66	95.7	146.85
92.4	168.3	95.7	56.1							211.2	226.05	94.05	94.05		181.5	524.7	77.55	153.45
151.8	127.05	59.4	59.4							105.6	132		92.4		105.6	321.75	125.4	112.2
70.95	280.5	59.4	69.3							61.05	237.6	69.3	100.65		70.95	325.05	87.45
87.45	105.6	77.55	128.7							143.55	127.05	240.9	62.7		92.4	176.55	113.85	141.9
214.5	226.05	199.65	62.7								173.25	171.6	127.05		105.6	59.4	72.6	163.35
145.2	79.2	69.3	56.1							135.3	155.1	166.65	61.05		135.3	298.65	135.3	67.65
290.4	242.55	102.3	64.35							95.7	148.5	77.55	64.35		150.15	488.4	174.9	135.3
84.15	123.75	122.1	87.45							99	90.75	145.2	89.1		92.4	173.25	117.15	254.1
79.2	115.5	674.85	234.3							75.9	254.1	77.55	222.75		82.5	64.35	138.6	158.4
118.8	77.55	82.5	59.4							136.95	298.65	151.8	212.85		115.5	285.45	387.75	62.7
178.2	648.45	122.1	69.3							161.7	273.9	146.85	198		59.4	115.5	107.25	77.55
75.9	135.3	61.05	70.95							57.75	196.35	95.7	57.75		308.55	105.6	155.1	275.55
64.35	66	85.8	62.7							127.05	206.25	191.4	102.3		168.3	102.3	103.95	70.95
89.1	77.55	62.7	161.7							108.9	94.05	174.9	194.7		196.35	193.05	239.25	66
103.95	356.4	166.65	97.35							184.8	303.6	212.85	160.05		84.15	89.1	174.9	148.5
87.45	118.8	62.7	117.15							250.8	77.55	173.25	136.95		311.85	445.5	89.1	66
92.4	102.3	128.7	128.7							128.7	108.9	133.65			300.3	72.6	125.4	110.55
74.25	100.65	85.8	89.1							198	89.1	153.45	217.8		70.95	67.65	125.4	59.4
75.9	72.6	70.95	94.05							169.95	127.05	67.65	150.15		72.6	105.6	392.7	94.05
148.5	123.75	57.75	105.6							90.75	84.15	298.65	64.35		188.1	145.2	174.9	196.35
87.45	166.65	136.95	75.9							278.85	120.45	100.65	290.4		74.25	219.45	99	198
64.35	336.6	267.3	115.5							108.9	84.15	267.3	198		176.55	330	95.7	84.15
77.55	56.1	62.7	82.5							130.35	371.25	156.75	84.15		57.75	74.25	97.35	483.45
66	130.35	70.95	61.05							391.05	219.45	160.05	103.95		257.4	84.15	183.15	74.25
133.65	70.95	90.75	77.55							89.1	229.35	57.75	112.2		57.75	90.75	257.4	57.75
186.45	87.45	75.9	430.65							214.5	133.65	194.7	349.8		161.7		59.4	201.3
92.4	69.3		82.5							70.95	87.45	495	201.3		255.75	143.55	504.9	219.45
56.1	85.8	62.7	67.65							255.75	278.85	89.1	204.6		75.9	206.25	80.85	372.9
75.9	61.05	168.3	82.5							77.55	120.45	141.9	435.6		339.9	184.8	282.15	214.5
193.05	341.55	186.45	72.6							148.5	150.15	221.1	171.6		262.35	77.55	61.05	427.35
99	113.85	277.2	103.95							268.95	56.1	133.65	75.9		259.05	239.25	79.2	74.25
62.7	85.8	90.75	67.65							74.25	231	85.8	425.7		425.7	209.55	66	77.55
72.6	113.85	107.25	151.8							259.05	282.15	150.15	247.5		174.9	70.95	99	288.75
70.95	59.4	82.5	77.55							178.2	151.8	108.9	132		75.9	194.7	99	199.65
56.1	80.85	57.75	70.95							214.5	249.15	110.55	214.5		84.15	70.95	272.25	115.5
57.75	66	110.55	252.45							143.55	118.8	94.05	97.35		110.55	239.25	183.15	519.75
	59.4	102.3	112.2							61.05	151.8	156.75	196.35		112.2	181.5	66	136.95
94.05	59.4	89.1	80.85							102.3	150.15	183.15	204.6			87.45	128.7	181.5
150.15	118.8	74.25	85.8							118.8	122.1	397.65	181.5		143.55	227.7	260.7	113.85
61.05	128.7	105.6	66							338.25	339.9	226.05	94.05		196.35	112.2	235.95	341.55
252.45	130.35	140.25	87.45							287.1	75.9	245.85	239.25		57.75	135.3	107.25	438.9
166.65	97.35	79.2	143.55							165	239.25	285.45	141.9		151.8	64.35	72.6	151.8
268.95	130.35	503.25	59.4							224.4	257.4	80.85	156.75		79.2	143.55	166.65	217.8
143.55	100.65	115.5	257.4							209.55	161.7	288.75	135.3		110.55	102.3	204.6	125.4
122.1	72.6	249.15	143.55							69.3	115.5	265.65	336.6		102.3	99	103.95	123.75
303.6	80.85	69.3	156.75							138.6	270.6	206.25	386.1		87.45	216.15	115.5	117.15
128.7	178.2	72.6	69.3							94.05	150.15	193.05	97.35		168.3	217.8	57.75	74.25
163.35	69.3	64.35	204.6							268.95	207.9	330	242.55		166.65	308.55		339.9
82.5	102.3	59.4	59.4							465.3	156.75	229.35	232.65		79.2		67.65	156.75
232.65	87.45	70.95	72.6							188.1	485.1	113.85	95.7		110.55	204.6	59.4	249.15
84.15	199.65	141.9	70.95							95.7	122.1	140.25	216.15		90.75	199.65	120.45	135.3
87.45	143.55	103.95	64.35							222.75	206.25	219.45	209.55		57.75	102.3	113.85	330
95.7	66	84.15								658.35	196.35	328.35	165		133.65	348.15	75.9	282.15
92.4	66	122.1	89.1							178.2	214.5	145.2	156.75		74.25	209.55	115.5	113.85
61.05	70.95	82.5	102.3							232.65	427.35	110.55	128.7		136.95	179.85	77.55	141.9
146.85	56.1	59.4	270.6							183.15	120.45	56.1	133.65		298.65	468.6	59.4	122.1
130.35		57.75	57.75							110.55	113.85	89.1	84.15		198	191.4	99	141.9
138.6	201.3	77.55	115.5							245.85	168.3	69.3	108.9		108.9	87.45	333.3	188.1
135.3	70.95	80.85	92.4								400.95	198	59.4		79.2	188.1	146.85	165
85.8	62.7	90.75	102.3							153.45	186.45	89.1	333.3		59.4	242.55	57.75	105.6
193.05	118.8	57.75	77.55							412.5	120.45	87.45	301.95		240.9	224.4	214.5	198
75.9	59.4	161.7	130.35							117.15	57.75	361.35	141.9		222.75	125.4	122.1	432.3
77.55	97.35	94.05	75.9							198	75.9	67.65	202.95		161.7	110.55	283.8	158.4
74.25	79.2	235.95	108.9							57.75	145.2	117.15	141.9		202.95	420.75	110.55	361.35
72.6	155.1	56.1	84.15							442.2	105.6	61.05	118.8		107.25	132	95.7	377.85
100.65	64.35	130.35	155.1							61.05	70.95	557.7	224.4		158.4	80.85	102.3	160.05
61.05	132	94.05	67.65							148.5		196.35	188.1		82.5	140.25	61.05	202.95
161.7	87.45	61.05	222.75							151.8	136.95	57.75	80.85		77.55	66	577.5	348.15
103.95	75.9	257.4	85.8							226.05	295.35	95.7	153.45		80.85	174.9	127.05	136.95
95.7	94.05	100.65	97.35							70.95	331.65	57.75	100.65		105.6	221.1	103.95	105.6
70.95	62.7	72.6	79.2							202.95	120.45	72.6	209.55		99	198	122.1	155.1
62.7	59.4	146.85	155.1							128.7	755.7	491.7	150.15		84.15	260.7	107.25	181.5
107.25	95.7	66	163.35							212.85	264	89.1	72.6		103.95	156.75	92.4	255.75
193.05	112.2	89.1	61.05							161.7	234.3	99	169.95		56.1	143.55	191.4	235.95
99	62.7	118.8	72.6							125.4	244.2	191.4	82.5		158.4	140.25	227.7	133.65
301.95		140.25	138.6							178.2	174.9		260.7		69.3	130.35	56.1	141.9
135.3	108.9	61.05	99							156.75	273.9	194.7	128.7		57.75	57.75	102.3	100.65
69.3	84.15	57.75	56.1							191.4	125.4	254.1	437.25			59.4	173.25	70.95
130.35	117.15	102.3	94.05							72.6	400.95	128.7	351.45		239.25	242.55	186.45
117.15	75.9	232.65	300.3							219.45	181.5	148.5	90.75		105.6	315.15	69.3	217.8
120.45	178.2	59.4	67.65							396	168.3	125.4	183.15		146.85	264	97.35	56.1
112.2	77.55	70.95	94.05							199.65	69.3	87.45	169.95		140.25	160.05	102.3	80.85
122.1	56.1	82.5	87.45							290.4	160.05	66	107.25		244.2	239.25	70.95	112.2
153.45	66	61.05	122.1							475.2	305.25	145.2	247.5		209.55	206.25	79.2	227.7
79.2	70.95	227.7	95.7							252.45	361.35	353.1			480.15	171.6	66	108.9
75.9	90.75	130.35	133.65							292.05	361.35	97.35			184.8	176.55	146.85	222.75
74.25	112.2	64.35	82.5							151.8	240.9	320.1			235.95	120.45	150.15	89.1
69.3	99	59.4	231							397.65	457.05	283.8			100.65	219.45	160.05	84.15
90.75	75.9	264	143.55							316.8	280.5	85.8			56.1	194.7	133.65	90.75
212.85	56.1	169.95	163.35							100.65	87.45	217.8			75.9	433.95	209.55	326.7
117.15	57.75	183.15								214.5	176.55	75.9			102.3	80.85	94.05	349.8
127.05	80.85	584.1	64.35							90.75	260.7	250.8			103.95	176.55	179.85	115.5
270.6	72.6	77.55	199.65							123.75	82.5	438.9			79.2	272.25	59.4	155.1
209.55	57.75	141.9	66							163.35	193.05	600.6			72.6	282.15	70.95	161.7
80.85	183.15	128.7	242.55							110.55	168.3	77.55			95.7	245.85	219.45	188.1
103.95	400.95		64.35							226.05	217.8	169.95			64.35	113.85	206.25	113.85
62.7	56.1	75.9	141.9							136.95	199.65	75.9			171.6	79.2	90.75	206.25
72.6	125.4	115.5	371.25							313.5	151.8	374.55			72.6	151.8	231	82.5
57.75	64.35	100.65	94.05							462	207.9	303.6			115.5	247.5	214.5	138.6
118.8	273.9	89.1	57.75							196.35	110.55	166.65			158.4	127.05	103.95	173.25
57.75	74.25	67.65	130.35							89.1	333.3	90.75			198	107.25	132	226.05
367.95	72.6	64.35	74.25							259.05	196.35	257.4			219.45	80.85	69.3	161.7
107.25	56.1	64.35	249.15							140.25	161.7	146.85			140.25	85.8	70.95	244.2
163.35	130.35	110.55	66							204.6	300.3	150.15			84.15	61.05	61.05	151.8
77.55	141.9	103.95	69.3							108.9	72.6	242.55			188.1		79.2	120.45
90.75	122.1	56.1	57.75							166.65	143.55	229.35			117.15	254.1	77.55	245.85
59.4	64.35	160.05	57.75							265.65	366.3	265.65			146.85	250.8	89.1	66
188.1	62.7	107.25	64.35							75.9	252.45	61.05			72.6	407.55	56.1	158.4
122.1	97.35	102.3	84.15							242.55	277.2	169.95			143.55	199.65	61.05	64.35
196.35	82.5	392.7	107.25							259.05	221.1	252.45			133.65	103.95	56.1	117.15
56.1	94.05	95.7	476.85							217.8	249.15	552.75			102.3	414.15	61.05	315.15
135.3	64.35	72.6	103.95							82.5	229.35	231			85.8	125.4	231	153.45
62.7	202.95	61.05	198							85.8	216.15	364.65			268.95	326.7	56.1	64.35
82.5	56.1	59.4	75.9							163.35	61.05	305.25			70.95	90.75	67.65	202.95
79.2	84.15	66	67.65							85.8	136.95	94.05			57.75	148.5	56.1	136.95
130.35	183.15	168.3	105.6							267.3	318.45	140.25			92.4	62.7	80.85	69.3
100.65	70.95	56.1	125.4							120.45	74.25	82.5			146.85	369.6	57.75	57.75
57.75	67.65	70.95	56.1							429	128.7	112.2			178.2	165	107.25	283.8
70.95		102.3	77.55							254.1	165	69.3			66	125.4		240.9
103.95	262.35	102.3	59.4							118.8	120.45	123.75			113.85	448.8	123.75	196.35
94.05	70.95	95.7	90.75							94.05	257.4	292.05			155.1	107.25	74.25	74.25
82.5	222.75	80.85	62.7							123.75	443.85	72.6			100.65	394.35	259.05	376.2
74.25	59.4	122.1	118.8							212.85	214.5	117.15			75.9	402.6	99	196.35
97.35	221.1	64.35	64.35							138.6	320.1	145.2			74.25	146.85	94.05	85.8
72.6	77.55	75.9	89.1							62.7	252.45	67.65			100.65	87.45	161.7	89.1
107.25	66	67.65	92.4							125.4	158.4	320.1			118.8	150.15	153.45	138.6
94.05	105.6	74.25	108.9							128.7	358.05	72.6			95.7	130.35	140.25	574.2
89.1	102.3	100.65	85.8							179.85	242.55	105.6			77.55	110.55	61.05	125.4
163.35	97.35	59.4	97.35							198	158.4	150.15			67.65	361.35	95.7	232.65
70.95	90.75	138.6	305.25							70.95	407.55	153.45			70.95	145.2	75.9	313.5
90.75	62.7	179.85	275.55							123.75	70.95	381.15			67.65	75.9	64.35	305.25
110.55	186.45	64.35	72.6							130.35	158.4	521.4			102.3	193.05	141.9	318.45
79.2	221.1	128.7	56.1							56.1	204.6	125.4			61.05	112.2	100.65	165
62.7	67.65	153.45	59.4								97.35	151.8			59.4	125.4	255.75	103.95
359.7	303.6	74.25	110.55							97.35	108.9	132			211.2	64.35	174.9	219.45
108.9	270.6	56.1	288.75							165		115.5			125.4	62.7	189.75	214.5
99	94.05	62.7	184.8							222.75	156.75	130.35			97.35	420.75	115.5	209.55
79.2	57.75	62.7	84.15							59.4	72.6	143.55			57.75	127.05	103.95	247.5
61.05	112.2	287.1	80.85							103.95	61.05	108.9			242.55	179.85	122.1	287.1
70.95	153.45	79.2	79.2							194.7	145.2	173.25			61.05	369.6	80.85	216.15
217.8	475.2	85.8	150.15							125.4	67.65	160.05			99	158.4	84.15	217.8
56.1	165	123.75	62.7							138.6	57.75	237.6			122.1	209.55	300.3	57.75
151.8		69.3	56.1							146.85	118.8	226.05			70.95	377.85	140.25	237.6
202.95	80.85	69.3	57.75							260.7	79.2	80.85			74.25	255.75	107.25	120.45
171.6	99	67.65	74.25							158.4	123.75	245.85			103.95	166.65	118.8	173.25
103.95	82.5		270.6							189.75	99	84.15			77.55	455.4	102.3	94.05
74.25	70.95	133.65	56.1							100.65	87.45	214.5			90.75	107.25	127.05	151.8
	108.9	226.05	89.1							348.15	133.65	102.3				344.85	108.9	72.6
	70.95	74.25	57.75							660	87.45	64.35			123.75	79.2	70.95	67.65
	61.05	232.65	130.35							89.1	165	74.25			74.25		140.25	273.9
	174.9	239.25	59.4							235.95	56.1	66			84.15	100.65	163.35	155.1
	99	242.55	77.55							94.05	56.1	115.5			80.85	161.7	87.45	193.05
	77.55	74.25								92.4	122.1	204.6			84.15	117.15	97.35	135.3
	255.75	102.3	77.55							354.75	102.3	90.75			155.1	110.55	79.2	92.4
	237.6	67.65	120.45							173.25	120.45				80.85	179.85	140.25	57.75
	275.55	69.3	85.8							110.55	75.9	61.05			67.65	227.7	87.45	130.35
	80.85	115.5	257.4							122.1	115.5	169.95			80.85	69.3	94.05
	206.25	82.5	171.6							179.85	59.4	249.15			69.3	82.5	107.25	107.25
	90.75	70.95	89.1							249.15	128.7	491.7			120.45	82.5	74.25	66
	66	189.75	115.5							316.8	79.2	84.15			140.25	118.8	196.35	108.9
	128.7	181.5	115.5							59.4	56.1	72.6			77.55	90.75	156.75	221.1
	100.65	112.2	99							176.55	77.55	122.1			69.3	201.3	146.85	422.4
	103.95	155.1	84.15							130.35	118.8	165			108.9	56.1	113.85	133.65
	74.25	120.45	422.4							242.55	155.1	194.7			59.4	94.05	110.55	191.4
	90.75	113.85	87.45							173.25	138.6	173.25			198	75.9	132	110.55
	57.75	56.1	72.6							415.8	77.55	165			70.95	108.9	67.65	108.9
	64.35	100.65	191.4							189.75	179.85	143.55			90.75	102.3	82.5	112.2
	145.2	338.25	57.75							245.85	136.95	310.2			112.2	77.55	56.1	222.75
	155.1	196.35	128.7							128.7	330	273.9			74.25	87.45	75.9	113.85
	82.5	189.75	84.15							72.6	318.45	160.05			59.4	82.5	95.7	130.35
	112.2	123.75	112.2							259.05	254.1	165			216.15	113.85	141.9	115.5
	188.1	72.6	64.35							70.95	112.2	245.85			57.75	102.3	94.05	74.25
	136.95	66	70.95							115.5	272.25	201.3			100.65	226.05	133.65	198
	117.15	62.7	103.95							61.05	145.2	483.45			105.6	92.4	57.75	145.2
	90.75	377.85	57.75							107.25	351.45	118.8			118.8	110.55	280.5	140.25
	75.9	80.85	117.15							188.1	105.6	308.55			110.55	77.55	82.5	160.05
	125.4	102.3	90.75							115.5	183.15	66			66	173.25	69.3	204.6
	166.65	321.75	66							178.2	460.35	181.5			84.15	70.95	155.1	270.6
	146.85	92.4	69.3							57.75	120.45	132			75.9	107.25	255.75	127.05
	85.8	74.25	112.2							259.05	447.15	325.05			163.35	56.1	232.65	141.9
	77.55	94.05	156.75							127.05	288.75	542.85			100.65	244.2	140.25	572.55
	429	123.75	117.15							165	231	173.25			133.65	338.25	145.2	323.4
	146.85	57.75	97.35							160.05	211.2	153.45			90.75	184.8	272.25	196.35
	92.4	57.75	66							273.9	146.85	577.5			66	100.65	267.3	176.55
	117.15	69.3	66							59.4	146.85	110.55			79.2	128.7	57.75	267.3
	95.7	99	70.95							168.3	61.05	151.8			207.9	143.55	155.1	130.35
	95.7	300.3	59.4							245.85	193.05	123.75			72.6	379.5	176.55	204.6
	84.15	69.3	140.25							66	138.6	61.05			70.95	226.05	222.75	112.2
	178.2	77.55	79.2							245.85	339.9	364.65			85.8	275.55	105.6	145.2
	94.05	74.25	387.75							301.95	267.3	128.7			123.75	198	122.1	64.35
	100.65	59.4	122.1							199.65	239.25	551.1			211.2	414.15	130.35	66
	79.2	128.7	328.35							171.6	151.8	432.3			146.85	113.85	171.6	82.5
	92.4	133.65	77.55							90.75	400.95	150.15			56.1	66	504.9	90.75
	207.9	66	61.05							56.1	252.45	265.65			66	150.15	87.45	80.85
	87.45	181.5	123.75								462	130.35			61.05	231	211.2	387.75
	59.4	77.55	82.5							244.2	74.25	148.5			97.35	99	212.85	117.15
	250.8	148.5	56.1							66	85.8	92.4			95.7	254.1	151.8	151.8
	158.4	400.95	72.6							61.05	221.1	61.05			74.25	359.7	122.1	292.05
	97.35	146.85	67.65							179.85	320.1	94.05			72.6	136.95	120.45	118.8
	448.8	108.9	94.05							328.35	356.4	235.95			72.6	79.2	87.45	61.05
	155.1	56.1	127.05							85.8	202.95	82.5			120.45	140.25	59.4
	174.9	62.7	90.75							94.05	163.35	158.4			110.55	57.75	85.8	67.65
	123.75	92.4	168.3							110.55	229.35	95.7			69.3	67.65		191.4
	82.5	168.3	77.55							99	201.3	112.2			61.05	224.4	674.85	79.2
	112.2	95.7	99							250.8	216.15	115.5			62.7	92.4	1353	64.35
	64.35	321.75	120.45							103.95	148.5	169.95			163.35	199.65	62.7	143.55
	117.15	117.15	100.65							511.5	178.2	125.4			87.45	222.75	151.8	209.55
	70.95	212.85	59.4							123.75	288.75	161.7			69.3	89.1	56.1	77.55
	110.55	232.65	82.5							227.7	198	112.2				217.8	64.35	64.35
	214.5	178.2	92.4							59.4		163.35				102.3	97.35	84.15
	242.55	99	176.55							110.55	356.4	163.35				80.85	90.75	290.4
	108.9	62.7	102.3							255.75	166.65	305.25				135.3	70.95	141.9
	72.6	82.5	92.4							224.4	97.35	67.65				216.15	186.45	108.9
	136.95	204.6	108.9							120.45	82.5	156.75				82.5	64.35	306.9
	113.85	64.35	77.55							351.45	397.65	72.6				79.2	145.2	366.3
		145.2	113.85							128.7	293.7	125.4				268.95	100.65	89.1
	90.75		70.95							140.25	59.4	166.65				66	188.1	249.15
	108.9	70.95								74.25	92.4	275.55				364.65	56.1	141.9
	295.35	74.25	349.8							285.45	92.4	508.2				186.45	77.55	181.5
	82.5	75.9	70.95							85.8	174.9	397.65				87.45	133.65	125.4
	59.4	57.75	87.45							303.6	288.75	79.2				75.9	84.15	155.1
	61.05	321.75	67.65							113.85	283.8	132				74.25	135.3	95.7
	61.05	112.2	62.7							226.05	265.65	120.45				254.1	75.9	94.05
	80.85	194.7	92.4							75.9	198	110.55				255.75	61.05	118.8
	254.1	103.95	127.05							74.25	264	191.4				193.05	57.75	232.65
	75.9	57.75	138.6							79.2	141.9	84.15				226.05	184.8	194.7
	57.75	293.7	74.25							74.25	287.1					64.35	145.2	115.5
	176.55	66	169.95							184.8	389.4	112.2				158.4	178.2	135.3
	57.75	156.75	75.9							298.65	239.25	148.5				62.7	143.55	174.9
	112.2	84.15	367.95							82.5	221.1	334.95				103.95	74.25	70.95
	72.6	95.7	273.9							508.2	158.4	56.1				257.4	399.3	303.6
	264	102.3	108.9							196.35	234.3	341.55				74.25	534.6	89.1
	70.95	156.75	108.9							84.15	160.05	178.2				84.15	103.95	240.9
	122.1	117.15	80.85							429	427.35	419.1				75.9	166.65	75.9
	90.75	282.15	99							103.95	160.05	80.85					282.15	80.85
	56.1	59.4	67.65							92.4	264	325.05					254.1	231
	99	255.75	77.55							318.45	155.1	231					64.35	217.8
	143.55	207.9	77.55							94.05	123.75	234.3					120.45	201.3
	74.25	92.4	66							99	471.9	103.95					108.9	338.25
	120.45	334.95	66							212.85	189.75	214.5					102.3	254.1
	117.15	174.9	74.25							89.1	184.8	572.55					283.8	168.3
	67.65	173.25	90.75							115.5	254.1	95.7					82.5	181.5
	136.95	165	113.85							475.2	56.1	239.25					74.25	785.4
	221.1	72.6	90.75							153.45	224.4	150.15					183.15	85.8
	69.3	103.95	97.35							80.85	158.4	130.35					128.7	105.6
	72.6	89.1	61.05							89.1	471.9	57.75					79.2	69.3
	72.6	103.95	70.95							227.7	181.5	140.25					163.35	136.95
	216.15	267.3	61.05							169.95	79.2	95.7					132	125.4
	59.4	66	69.3							216.15	61.05	107.25					56.1	130.35
	163.35	99	57.75							77.55	214.5	103.95					57.75	89.1
	77.55	100.65	239.25							252.45	410.85	143.55					171.6	61.05
	353.1	100.65	61.05							128.7	113.85	270.6					97.35	56.1
	89.1	77.55	102.3							153.45	265.65	217.8
	99	66	92.4							490.05	400.95	135.3					99	138.6
	75.9	84.15	74.25							128.7	321.75	140.25					328.35	145.2
	115.5	166.65	100.65							290.4	56.1	295.35					216.15	56.1
	69.3	179.85	100.65							120.45	486.75	306.9					293.7	130.35
	79.2	683.1	87.45							358.05	117.15	273.9					57.75	153.45
	64.35	166.65	132							84.15	84.15	122.1					414.15	290.4
	250.8	59.4	57.75							257.4	242.55	89.1					118.8	64.35
	97.35	77.55	110.55							158.4		107.25					356.4	100.65
	67.65	62.7	97.35							80.85	80.85	244.2					174.9	102.3
	61.05	102.3	59.4							191.4	297	97.35					130.35	259.05
	57.75	117.15	90.75							166.65	278.85	72.6					283.8	133.65
	107.25	171.6								61.05	102.3	219.45					143.55	97.35
	64.35	80.85	123.75							165	123.75	95.7					183.15	117.15
	102.3	61.05	156.75								475.2	89.1					209.55	66
		179.85	115.5							115.5	97.35	125.4					75.9	169.95
	66	145.2	189.75							120.45	265.65	84.15					275.55	79.2
	94.05	107.25	87.45							247.5	74.25	150.15					275.55	122.1
	103.95	105.6	61.05							64.35	161.7	125.4					169.95	120.45
	252.45	66	156.75							298.65	202.95	128.7					146.85	222.75
	89.1	75.9	115.5							250.8	61.05	191.4					136.95	108.9
	277.2	165	70.95							559.35	245.85	123.75					303.6	69.3
	127.05	70.95	125.4							67.65	140.25	148.5					117.15	87.45
	80.85	282.15	120.45							168.3	227.7	57.75					75.9	166.65
	118.8	67.65	77.55							113.85	120.45	72.6					277.2	160.05
	85.8	166.65	69.3							153.45	257.4	133.65					189.75	77.55
	82.5	69.3	75.9							132	399.3	252.45					176.55	103.95
	57.75	128.7	132							259.05	123.75	160.05					97.35	102.3
	80.85	82.5	163.35							532.95	100.65	103.95					491.7	59.4
	107.25	89.1	150.15							97.35	155.1	308.55					165	56.1
	64.35	56.1	90.75							234.3	179.85	349.8					57.75	178.2
	85.8	148.5	69.3							70.95	94.05	551.1					216.15	59.4
	181.5	59.4	490.05							178.2	349.8	176.55					112.2	181.5
	100.65		120.45							419.1	151.8	61.05					297	70.95
	66	169.95	84.15							202.95	343.2	191.4					427.35	336.6
	57.75	292.05	57.75							427.35	235.95	133.65					117.15	97.35
	57.75	120.45	414.15							132	262.35	516.45					171.6	67.65
	130.35	94.05	169.95							77.55	305.25	125.4					75.9	66
	90.75	75.9	122.1							56.1	267.3	122.1					59.4	146.85
	72.6	62.7	138.6							216.15	123.75	158.4					67.65	132
	74.25	94.05	100.65							306.9	283.8	504.9					252.45	297
	61.05	189.75	77.55							211.2	59.4	103.95					191.4	56.1
	85.8	56.1	795.3							297	151.8	163.35					344.85	99
	82.5	237.6	169.95							150.15	217.8	117.15					211.2	122.1
	82.5	64.35	204.6							262.35	268.95	212.85					92.4	95.7
	113.85	285.45	66							282.15	153.45	82.5					118.8	130.35
	94.05	161.7	288.75							191.4	75.9	133.65					102.3	62.7
	66	100.65	74.25							207.9	136.95	158.4					103.95
	103.95	135.3	186.45							169.95	169.95	369.6					140.25	301.95
	95.7	84.15	103.95							231	66	297					99	59.4
	176.55	84.15	123.75							69.3	265.65	206.25					117.15	311.85
	115.5	229.35	255.75							92.4	239.25	57.75					115.5	222.75
	89.1	82.5	84.15							207.9	188.1						110.55	82.5
	67.65	179.85	122.1							146.85	244.2	102.3					531.3	85.8
	115.5	113.85	75.9							87.45	455.4	72.6					138.6	199.65
	155.1	69.3	89.1							145.2	183.15	61.05					166.65	146.85
	64.35	70.95	66							146.85	409.2	61.05					160.05	85.8
	84.15	102.3	214.5							181.5	318.45	249.15					222.75	160.05
	75.9	82.5	107.25							74.25	204.6	62.7					120.45	75.9
	244.2	69.3	120.45							105.6	189.75	143.55					181.5	123.75
	132	74.25	72.6							57.75	123.75	70.95					75.9	95.7
	115.5	168.3	94.05							108.9	257.4	148.5					227.7	130.35
	125.4	77.55	125.4							97.35	100.65	117.15					188.1	181.5
	82.5	62.7	80.85							94.05	239.25	113.85					196.35	420.75
	235.95	120.45	214.5							133.65	310.2	56.1					229.35	178.2
	173.25	141.9	102.3							196.35	308.55	72.6					410.85	75.9
	59.4	82.5	155.1								237.6	90.75					366.3	183.15
	94.05	75.9	179.85							283.8	229.35	349.8					74.25	92.4
	186.45	69.3	268.95							118.8	354.75	66					160.05	120.45
	146.85	89.1	82.5							130.35	82.5	75.9					107.25	189.75
	61.05	74.25	74.25							359.7	136.95	69.3					301.95	564.3
	66	168.3	57.75							165	293.7	66					138.6	188.1
		99	89.1							163.35	112.2	94.05					242.55	146.85
		82.5	95.7							227.7	232.65	85.8					156.75	99
		153.45								92.4	382.8	151.8					127.05	440.55
		70.95								331.65	556.05	183.15						169.95
		57.75								85.8	156.75	72.6					270.6	72.6
		64.35								288.75	66	79.2					62.7	153.45
		105.6								262.35	235.95	247.5					135.3	112.2
		112.2								216.15	244.2	61.05					123.75	169.95
		277.2								84.15	140.25	84.15					82.5	72.6
		174.9								118.8	188.1	79.2					57.75	166.65
		69.3								70.95	130.35	92.4					199.65	140.25
		160.05								259.05	173.25	107.25					115.5	221.1
		250.8								214.5	323.4	285.45					249.15	186.45
		77.55								417.45	148.5	169.95					389.4	107.25
		99								69.3		440.55					179.85	178.2
		103.95								102.3	300.3	295.35					268.95	226.05
		59.4								176.55	82.5	128.7					176.55	174.9
		349.8								113.85	156.75	138.6					64.35	178.2
		85.8								181.5	72.6	107.25					239.25	117.15
		82.5								242.55	94.05	84.15					103.95	107.25
		82.5								140.25	184.8	214.5					193.05	90.75
		82.5								184.8	102.3	125.4					219.45	184.8
		64.35								189.75	171.6	94.05					409.2	66
		70.95								405.9	235.95	92.4					56.1	242.55
		110.55								341.55	70.95	117.15					100.65	69.3
		92.4								171.6	161.7	207.9					348.15	308.55
		138.6								82.5	282.15	95.7					64.35	117.15
		100.65								237.6	64.35	173.25					82.5	94.05
		97.35								158.4	163.35	151.8					99	278.85
		102.3								108.9	422.4	113.85					222.75	87.45
		77.55								442.2	133.65						217.8	80.85
		84.15								94.05	415.8						66	433.95
		70.95								148.5	110.55						75.9	201.3
		57.75								255.75	100.65						92.4	99
		74.25								334.95	70.95						334.95	259.05
										66	115.5						169.95	458.7
		130.35								262.35	160.05						128.7	118.8
		95.7								415.8	430.65						174.9	94.05
		135.3								125.4	132						90.75	163.35
		70.95								163.35	59.4						209.55	117.15
		74.25								217.8	257.4						562.65	221.1
		105.6								72.6	239.25						292.05	67.65
		61.05								234.3	214.5						226.05	64.35
		66								275.55	128.7						148.5	143.55
		82.5								293.7	226.05						102.3	107.25
		216.15								207.9	57.75						264	221.1
		70.95								112.2	160.05						69.3	105.6
		69.3									404.25						168.3	196.35
		123.75									993.3						193.05	212.85
		94.05									72.6						97.35	89.1
		417.45									237.6						100.65	77.55
		72.6									242.55						198	70.95
		70.95									67.65						146.85	171.6
		85.8									163.35						235.95	384.45
		72.6									212.85						110.55	249.15
		74.25									117.15						173.25	349.8
		59.4									272.25						206.25	107.25
		90.75									61.05						339.9	160.05
		66									128.7						72.6	161.7
		87.45									242.55						207.9	143.55
		77.55									186.45						62.7	212.85
		120.45									315.15						74.25	75.9
		141.9									148.5						330	72.6
		184.8									120.45						315.15	123.75
		67.65									214.5						326.7	112.2
		160.05									143.55						59.4	105.6
		72.6									89.1						148.5	118.8
		77.55									301.95						160.05	254.1
		189.75									166.65						295.35	227.7
		75.9									127.05						222.75
		165									161.7						77.55
		72.6									127.05						245.85
		56.1									113.85						128.7
		67.65									102.3
		181.5									153.45
		259.05									234.3
		161.7									427.35
		70.95									123.75
		270.6									56.1
		85.8									130.35
		64.35									62.7
		113.85									242.55
		84.15									227.7
		216.15
		132
		74.25
		82.5
		64.35
		161.7
		94.05
		77.55
		169.95
		70.95
		72.6
		79.2

## Sheet: Fig2B
0h			8h			16h			24h
Basal	supra basal		Basal	supra basal		Basal	supra basal		Basal	supra basal
69.3	140.45		127.05	363.05		485.1	262.35		463.65	262.35
132	294.15		151.8	119.25		150.15	129.85		445.5	129.85
105.6	106		59.4	135.15		122.1	164.3		473.55	164.3
201.3	288.85		69.3	842.7		100.65	328.6		376.2	328.6
123.75	363.05		174.9	166.95		132	1261.4		326.7	1261.4
117.15	1258.75		84.15	333.9		66	188.15		400.95	188.15
191.4	254.4		80.85	328.6		118.8	707.55		61.05	707.55
288.75	270.3		161.7	522.05		265.65	100.7		486.75	100.7
145.2	445.2		89.1	246.45		92.4	201.4		366.3	201.4
82.5	487.6		306.9	304.75		235.95	212		115.5	212
113.85	127.2		74.25	418.7		62.7	421.35		541.2	421.35
130.35	659.85		62.7	466.4		90.75	339.2		371.25	339.2
128.7	1192.5		95.7			188.1	575.05		234.3	575.05
110.55	1144.8		112.2	477		562.65	349.8		301.95	349.8
268.95	540.6		87.45	106		100.65	609.5		359.7	609.5
217.8	575.05		62.7	556.5		306.9	341.85		742.5	341.85
140.25	323.3		138.6	196.1		232.65	318		564.3	318
191.4	424		82.5	673.1		214.5	111.3		278.85	111.3
57.75	296.8		107.25	212		143.55	426.65		92.4	426.65
204.6	233.2		92.4	198.75		80.85	129.85		476.85	129.85
330	275.6		72.6	447.85		158.4	431.95		334.95	431.95
186.45	312.7		95.7	328.6		240.9	201.4		97.35	201.4
57.75	161.65		66	267.65		145.2	665.15		270.6	665.15
191.4	259.7		105.6	564.45		100.65	614.8		328.35	614.8
138.6	111.3		184.8	172.25		196.35	100.7		320.1	100.7
214.5	219.95		90.75	238.5		339.9	1181.9		292.05	1181.9
321.75	265		75.9	323.3		333.3	201.4		153.45	201.4
102.3	429.3		283.8	185.5		173.25	585.65		280.5	585.65
493.35	312.7		64.35	524.7		194.7	161.65		452.1	161.65
127.05	132.5		105.6	254.4		217.8	718.15		445.5	718.15
67.65	219.95		66	278.25		183.15	429.3		118.8	429.3
107.25	1044.1		70.95	180.2		176.55	113.95		201.3	113.95
409.2	797.65			344.5		97.35	657.2		128.7	657.2
169.95	140.45		255.75	744.65		118.8	235.85		277.2	235.85
277.2	164.3		103.95	302.1		153.45	296.8		590.7	296.8
189.75	696.95		97.35	421.35		188.1	1582.05		140.25	1582.05
554.4	249.1		110.55	148.4		153.45	681.05		82.5	681.05
90.75	384.25		103.95	127.2		168.3	649.25		165	649.25
305.25	121.9		102.3	296.8		409.2	474.35		273.9	474.35
257.4	349.8		153.45	214.65		90.75	302.1		160.05	302.1
240.9	238.5		57.75	813.55		206.25	434.6		490.05	434.6
74.25	437.25		87.45	299.45		108.9	286.2		283.8	286.2
396	371		74.25	272.95		123.75	394.85		226.05	394.85
198	312.7		75.9	230.55		392.7			400.95
56.1	302.1		161.7	341.85		372.9	882.45		145.2	882.45
108.9	151.05		89.1	161.65		133.65	662.5		344.85	662.5
226.05	100.7		77.55	127.2		201.3	241.15		66	241.15
160.05	352.45		176.55	145.75		301.95	304.75		376.2	304.75
128.7	333.9		64.35	219.95		80.85	490.25		315.15	490.25
118.8	291.5		140.25	241.15		77.55	500.85		247.5	500.85
239.25	434.6		204.6	302.1		136.95	182.85		496.65	182.85
84.15	148.4		118.8	100.7		77.55	418.7		265.65	418.7
598.95	318		74.25	490.25		168.3	392.2		151.8	392.2
163.35	265		79.2	588.3		110.55	694.3		623.7	694.3
184.8	1065.3		99	190.8		260.7	100.7		254.1	100.7
490.05	196.1		99	651.9		541.2	111.3		631.95	111.3
440.55	617.45		87.45	442.55		87.45	887.75		204.6	887.75
135.3	206.7		125.4	437.25		132	206.7		229.35	206.7
87.45	190.8		87.45	710.2		165	288.85		371.25	288.85
105.6	116.6		85.8	463.75		84.15	214.65		272.25	214.65
135.3	397.5		102.3	100.7		84.15	537.95		348.15	537.95
117.15	278.25		56.1	445.2		85.8	482.3		145.2	482.3
207.9	339.2		77.55	270.3		151.8	153.7		165	153.7
128.7			94.05	198.75		125.4	116.6		188.1	116.6
204.6	129.85		84.15	198.75		270.6	180.2		79.2	180.2
125.4	161.65		102.3	246.45		75.9	355.1		594	355.1
112.2	100.7		61.05	169.6		80.85	328.6		237.6	328.6
108.9	238.5		100.65	431.95		123.75	177.55		384.45	177.55
176.55	262.35		89.1	336.55		90.75	537.95		62.7	537.95
189.75	182.85		67.65	752.6		89.1	368.35		171.6	368.35
70.95	294.15		272.25			122.1	238.5		102.3	238.5
	325.95		87.45	500.85		163.35	235.85		339.9	235.85
122.1	283.55		64.35	198.75		97.35	681.05		311.85	681.05
268.95	219.95		72.6	132.5		80.85	103.35		463.65	103.35
145.2	156.35		143.55	662.5		165	633.35		310.2	633.35
344.85	243.8		133.65	469.05		179.85	1007		376.2	1007
239.25	164.3		278.85	206.7		130.35	302.1		102.3	302.1
150.15	217.3		105.6	588.3		166.65	233.2		140.25	233.2
80.85	227.9		135.3			381.15	145.75		377.85	145.75
72.6	543.25		198	853.3		176.55	519.4		57.75	519.4
61.05	355.1		69.3	233.2		112.2	188.15		250.8	188.15
115.5	188.15		136.95	193.45		221.1	196.1		222.75	196.1
145.2	577.7		103.95	212		66	323.3		433.95	323.3
127.05	151.05		70.95	320.65		292.05	283.55		102.3	283.55
128.7	182.85		80.85	201.4		155.1	204.05		617.1	204.05
158.4	169.6		204.6	188.15		158.4	418.7		189.75	418.7
369.6	280.9		132	389.55		120.45	431.95		85.8	431.95
232.65	757.9		77.55	696.95		74.25	103.35		69.3	103.35
103.95	103.35		136.95	225.25		94.05	347.15		313.5	347.15
69.3	159		72.6	225.25		100.65	127.2		265.65	127.2
189.75	100.7		70.95	315.35		343.2	954		242.55	954
183.15	726.1		229.35	458.45		113.85	132.5		636.9	132.5
145.2	124.55		92.4	127.2		184.8	140.45		488.4	140.45
160.05	394.85		103.95	196.1		67.65	291.5		503.25	291.5
56.1	612.15		156.75			409.2			315.15
176.55	495.55		94.05	302.1		80.85	458.45		297	458.45
72.6	129.85		77.55	304.75		232.65	127.2		80.85	127.2
92.4	405.45		100.65	188.15		145.2	964.6		207.9	964.6
79.2	132.5		120.45	394.85		193.05	159		69.3	159
99	262.35		138.6	278.25		105.6	153.7		465.3	153.7
115.5	132.5		113.85	1401.85			389.55		66	389.55
138.6	466.4		132	270.3		84.15	201.4		288.75	201.4
189.75	272.95		97.35	696.95		84.15	106		204.6	106
146.85	212			185.5		268.95	283.55		282.15	283.55
516.45	437.25		178.2	455.8		188.1	450.5		311.85	450.5
89.1	389.55		176.55	267.65		66	174.9		437.25	174.9
100.65	238.5		74.25	394.85		132	612.15		265.65	612.15
186.45	196.1		115.5			97.35	484.95		283.8	484.95
217.8	307.4		67.65	421.35		242.55	135.15		67.65	135.15
186.45	111.3		346.5	238.5		293.7	143.1		239.25	143.1
94.05	318		301.95	159		455.4	315.35		99	315.35
128.7	254.4		75.9	453.15		247.5	111.3		191.4	111.3
89.1			207.9	151.05		127.05	145.75		392.7	145.75
94.05	325.95		87.45	530		211.2	198.75		189.75	198.75
122.1	108.65		59.4	434.6		67.65	280.9			280.9
103.95	132.5		57.75	188.15		92.4	315.35		239.25	315.35
201.3	132.5		100.65	455.8		64.35	259.7		66	259.7
143.55	519.4		82.5	402.8		387.75	204.05		575.85	204.05
117.15	164.3		90.75	397.5		74.25	466.4		138.6	466.4
217.8	365.7		181.5	169.6		100.65	487.6		92.4	487.6
217.8	172.25		103.95	341.85		165	283.55		1221	283.55
136.95	310.05		99			514.8	164.3		448.8	164.3
226.05	153.7		69.3			112.2	583		993.3	583
125.4	519.4		56.1			178.2	490.25		226.05	490.25
212.85	174.9		61.05			186.45	135.15		272.25	135.15
214.5	384.25		89.1			235.95	204.05		597.3	204.05
103.95	209.35		331.65			194.7	151.05		148.5	151.05
61.05	174.9		1158.3			1036.2	169.6		87.45	169.6
110.55	249.1		57.75			179.85	458.45		961.95	458.45
79.2	164.3		62.7			99	113.95		89.1	113.95
128.7	156.35		120.45			102.3	400.15		115.5	400.15
127.05	249.1		61.05			207.9	482.3		1984.95	482.3
61.05	212		56.1			300.3			523.05
	283.55		72.6			245.85	710.2		82.5	710.2
150.15	116.6		95.7			97.35	262.35		57.75	262.35
173.25	206.7		79.2			120.45	156.35		1027.95	156.35
594	294.15		66			61.05	604.2		348.15	604.2
161.7	283.55		74.25			56.1	1139.5		2211	1139.5
153.45	185.5		90.75			112.2	302.1		557.7	302.1
99	540.6		122.1			100.65	180.2		358.05	180.2
163.35	214.65		105.6			1636.8	800.3		194.7	800.3
59.4	153.7		95.7			100.65	111.3		75.9	111.3
156.75	225.25		87.45			315.15	209.35		928.95	209.35
84.15	198.75		69.3			64.35	286.2		699.6	286.2
425.7	193.45		133.65			70.95	106		925.65	106
143.55	193.45		62.7			92.4	113.95		56.1	113.95
74.25	132.5		202.95				217.3		895.95	217.3
189.75	318		128.7			356.4	842.7		146.85	842.7
559.35	331.25		97.35			156.75	132.5		422.4	132.5
133.65	159		163.35			108.9	185.5		636.9	185.5
100.65	424		117.15			245.85	265		511.5	265
226.05	222.6		66			452.1	140.45		221.1	140.45
108.9	302.1		59.4			339.9	792.35		133.65	792.35
61.05	243.8		92.4			404.25	222.6		174.9	222.6
107.25			84.15			247.5	217.3		105.6	217.3
122.1	188.15		59.4			123.75			405.9
143.55	204.05		108.9			110.55	646.6		74.25	646.6
84.15	294.15		133.65			168.3	291.5		405.9	291.5
75.9	127.2		69.3			184.8	612.15		919.05	612.15
146.85	357.75		110.55			92.4	209.35		313.5	209.35
158.4	241.15		84.15			204.6	514.1		292.05	514.1
77.55	299.45		90.75			123.75	291.5		145.2	291.5
64.35	344.5		165			70.95	413.4		587.4	413.4
100.65	254.4		70.95			508.2	315.35		379.5	315.35
103.95	333.9		117.15			874.5			438.9
150.15	156.35		80.85			270.6			117.15
140.25	272.95		77.55			72.6			183.15
79.2	204.05		85.8			113.85			62.7
67.65	262.35		74.25			123.75			259.05
938.85	217.3					165			202.95
179.85	161.65		82.5			536.25			112.2
169.95	193.45		113.85			562.65			612.15
77.55	924.85		85.8			443.85			89.1
115.5	145.75		62.7			201.3			562.65
80.85	132.5		295.35			69.3			564.3
125.4	299.45		117.15			470.25			298.65
176.55	339.2		105.6			191.4			450.45
155.1	363.05		74.25			105.6			140.25
62.7	259.7		72.6			206.25			831.6
90.75	373.65		70.95			265.65			85.8
107.25	174.9		95.7			160.05			1542.75
358.05	373.65		141.9			273.9			234.3
140.25	241.15		85.8			290.4			463.65
80.85	402.8		89.1			59.4			112.2
105.6	246.45		67.65			206.25			219.45
245.85	265		87.45						567.6
62.7	227.9		69.3			481.8			742.5
107.25	132.5		69.3			280.5			612.15
250.8	227.9		475.2			171.6			130.35
66	113.95		155.1			161.7			288.75
153.45	267.65		61.05			468.6			176.55
135.3	514.1		117.15			117.15			231
161.7	612.15		127.05			199.65			391.05
145.2	246.45		82.5			176.55			211.2
90.75	381.6		74.25			173.25			69.3
100.65	233.2		320.1			191.4			56.1
99	135.15		125.4			132
165	127.2		95.7			72.6			158.4
140.25			108.9			336.6			82.5
84.15	283.55		77.55			82.5			77.55
186.45	212		94.05			127.05			366.3
118.8	174.9		105.6			651.75			102.3
122.1	259.7		179.85			328.35			379.5
151.8	874.5		59.4			57.75			396
113.85	140.45		97.35			273.9			480.15
146.85	736.7		80.85			56.1			376.2
56.1	132.5		156.75			168.3			102.3
110.55	524.7		61.05			209.55			193.05
130.35	230.55		118.8			113.85			442.2
97.35	246.45		189.75			100.65			232.65
115.5	325.95		183.15			108.9			417.45
70.95	543.25		89.1	331.25		234.3			94.05
153.45	418.7		89.1	267.65		280.5			339.9
95.7	108.65		77.55	593.6		153.45			163.35
102.3	673.1		66	267.65		75.9			239.25
64.35	145.75		259.05	103.35		132			498.3
70.95	161.65		67.65	259.7		90.75			283.8
	296.8		72.6	238.5		161.7			214.5
470.25	365.7		249.15	453.15		534.6			85.8
103.95	113.95		199.65	185.5		169.95			442.2
151.8	532.65		80.85	1436.3		148.5			57.75
242.55	219.95		221.1	116.6		89.1			237.6
166.65	837.4		61.05	257.05		120.45			57.75
257.4	111.3		379.5	1054.7		264			97.35
158.4	540.6		140.25	336.55		61.05			400.95
136.95	495.55		168.3	339.2		115.5			458.7
95.7	328.6		118.8	384.25		214.5			57.75
234.3	397.5		181.5	718.15		117.15			752.4
174.9	212		66	2276.35		105.6			82.5
138.6	408.1		66	837.4		118.8			249.15
321.75	233.2		67.65	593.6		64.35			283.8
140.25	225.25		108.9	325.95		112.2			613.8
181.5	373.65		59.4	519.4		222.75			59.4
135.3	259.7			113.95		64.35			118.8
95.7	143.1		56.1	312.7					268.95
146.85	100.7		94.05	153.7		245.85			239.25
173.25	129.85		69.3	116.6		260.7			130.35
186.45	156.35		74.25	299.45		99			303.6
99	121.9		107.25	999.05		85.8			74.25
158.4	164.3		135.3	349.8		61.05			186.45
174.9	180.2		92.4	310.05		166.65			334.95
161.7	106		148.5	535.3		166.65			75.9
174.9	996.4		85.8	180.2		366.3			74.25
95.7	161.65		84.15	283.55		148.5			62.7
120.45	145.75		66	302.1		146.85			414.15
163.35	100.7		110.55	371		123.75			120.45
158.4	233.2		125.4	1245.5		260.7			272.25
341.55	106		69.3	1105.05		110.55			56.1
94.05	651.9		143.55	365.7		305.25			156.75
123.75	196.1		67.65	352.45		95.7			483.45
326.7	169.6		105.6	159		275.55			361.35
237.6	161.65		70.95	773.8		67.65			150.15
108.9	304.75		84.15	522.05		105.6			308.55
229.35	384.25		59.4	129.85		125.4			90.75
108.9	135.15		56.1	352.45		75.9			462
221.1	283.55		56.1			108.9			97.35
105.6	164.3		155.1	744.65		712.8			97.35
270.6	190.8		67.65	151.05		120.45			77.55
95.7	209.35		130.35	1113		318.45			87.45
75.9	190.8		143.55	654.55		79.2			742.5
99	190.8		105.6	307.4		94.05			56.1
422.4	148.4		117.15	113.95		285.45			171.6
105.6	267.65		99	172.25		95.7	304.75			304.75
204.6			61.05	166.95		92.4	784.4		66	784.4
138.6	159		69.3	384.25		67.65	204.05		57.75	204.05
118.8	230.55		57.75	365.7		237.6	145.75		57.75	145.75
163.35	111.3		84.15	948.7		72.6	394.85		202.95	394.85
120.45	227.9		59.4	341.85		407.55	172.25		544.5	172.25
127.05	344.5		61.05	108.65		163.35	124.55		295.35	124.55
99	312.7		107.25	140.45		122.1	103.35		308.55	103.35
92.4	174.9		75.9	824.15		655.05	121.9		194.7	121.9
61.05	318		87.45	392.2		163.35	347.15		300.3	347.15
97.35	129.85		67.65	166.95		260.7	1613.85		681.45	1613.85
313.5	320.65		1059.3	1113		231	177.55		433.95	177.55
122.1	249.1		232.65	389.55		166.65	1128.9		608.85	1128.9
75.9	378.95		67.65	323.3		2268.75	397.5		306.9	397.5
155.1	278.25		105.6	416.05		562.65	1431		56.1	1431
92.4	673.1		145.2	225.25		84.15	116.6		499.95	116.6
293.7	299.45		79.2	712.85		179.85	280.9		183.15	280.9
280.5	286.2		183.15	254.4		600.6	1409.8		437.25	1409.8
239.25	318		166.65	254.4		80.85	1038.8		437.25	1038.8
262.35	164.3		59.4	100.7		87.45	190.8		491.7	190.8
140.25	111.3		94.05	606.85		72.6	190.8		432.3	190.8
209.55	628.05		110.55	381.6		297	601.55		133.65	601.55
108.9	344.5		67.65	1266.7		62.7	111.3		1093.95	111.3
120.45	206.7			286.2		161.7	885.1		297	885.1
108.9	307.4		75.9	471.7		75.9	797.65		435.6	797.65
113.85	341.85		103.95	606.85		125.4	458.45		344.85	458.45
95.7	286.2		57.75	349.8			723.45		1079.1	723.45
75.9	148.4		56.1	689		369.6			353.1
207.9	386.9		82.5	816.2		219.45	174.9		80.85	174.9
118.8	161.65		112.2	320.65		369.6	336.55		839.85	336.55
110.55	365.7		102.3	834.75		227.7	622.75		676.5	622.75
	1356.8		77.55	206.7		128.7	217.3		110.55	217.3
136.95	1107.7		138.6	461.1		227.7	681.05		130.35	681.05
67.65	278.25		64.35	360.4		82.5	177.55		371.25	177.55
95.7	119.25		64.35	1070.6		257.4	532.65		683.1	532.65
211.2	172.25		165	877.15		105.6	394.85		232.65	394.85
211.2	604.2		128.7	103.35		95.7	1001.7		189.75	1001.7
376.2	355.1		117.15	230.55		62.7	461.1		532.95	461.1
212.85	461.1		99	495.55		105.6	418.7		201.3	418.7
160.05	129.85		108.9	429.3		120.45	360.4		56.1	360.4
231	397.5		204.6	225.25		140.25	1457.5		810.15	1457.5
943.8	283.55		56.1	413.4		77.55	1590		211.2	1590
628.65	257.05		69.3	212		397.65	1362.1		270.6	1362.1
102.3	135.15		132	204.05		85.8	1754.3		420.75	1754.3
206.25			82.5	535.3		303.6	522.05		79.2	522.05
217.8			57.75	145.75		146.85	543.25		389.4	543.25
138.6			115.5	630.7		356.4	206.7		219.45	206.7
155.1			57.75	455.8		155.1	241.15		136.95	241.15
252.45			235.95	450.5		224.4	106		193.05	106
229.35			69.3			89.1			102.3
199.65			70.95	291.5		283.8	795		105.6	795
143.55			94.05	180.2		133.65	434.6			434.6
234.3			156.75	1123.6		457.05	169.6		75.9	169.6
235.95			118.8	400.15		245.85	201.4		158.4	201.4
184.8			99	225.25		173.25	307.4		143.55	307.4
178.2			74.25	137.8		59.4	363.05		64.35	363.05
211.2			165	177.55		306.9	564.45		85.8	564.45
163.35			80.85	601.55		199.65	103.35		255.75	103.35
59.4			113.85	222.6		178.2	222.6		94.05	222.6
67.65			102.3	458.45		267.3	940.75		491.7	940.75
264			168.3	333.9		209.55	262.35		87.45	262.35
108.9			80.85	519.4		138.6	241.15		62.7	241.15
59.4			85.8	320.65		59.4	575.05		118.8	575.05
130.35			316.8	461.1		57.75	564.45		57.75	564.45
226.05			429	519.4		125.4	318		66	318
128.7			80.85	1277.3		94.05	172.25		214.5	172.25
189.75	760.55		141.9	148.4		100.65	198.75		79.2	198.75
174.9	320.65		72.6	553.85		202.95	617.45		156.75	617.45
254.1	143.1		69.3	463.75		160.05	267.65		443.85	267.65
70.95	151.05		163.35	2236.6		87.45	551.2		66	551.2
153.45	408.1		112.2	214.65			246.45		163.35	246.45
498.3	484.95		72.6	222.6		74.25	206.7		217.8	206.7
366.3	121.9		74.25	219.95		59.4	113.95		273.9	113.95
87.45	246.45		128.7	275.6		72.6	569.75		430.65	569.75
232.65	1677.45		80.85	906.3		191.4	132.5		315.15	132.5
219.45	384.25		57.75	400.15		194.7	135.15		103.95	135.15
178.2	119.25		69.3	159		235.95	180.2		92.4	180.2
59.4	100.7		115.5	137.8		95.7	516.75		89.1	516.75
79.2	439.9			318		62.7	386.9		245.85	386.9
	174.9			453.15			164.3		310.2	164.3
69.3	185.5			164.3			307.4		387.75	307.4
341.55	333.9			286.2			204.05		84.15	204.05
132	164.3			124.55			463.75		330	463.75
207.9	201.4			500.85			257.05		226.05	257.05
95.7	177.55			816.2			482.3		221.1	482.3
85.8	349.8						164.3		64.35	164.3
308.55	132.5			318			137.8		82.5	137.8
85.8	341.85			471.7			294.15		272.25	294.15
130.35	169.6			349.8					287.1
148.5	270.3			1656.25			352.45		102.3	352.45
161.7	352.45			100.7			100.7		160.05	100.7
151.8	458.45			622.75			649.25		889.35	649.25
141.9	180.2			567.1			442.55		328.35	442.55
320.1	106			1150.1			174.9		239.25	174.9
130.35	166.95			304.75			254.4		115.5	254.4
85.8	795			416.05			108.65		268.95	108.65
194.7	439.9			132.5			166.95		72.6	166.95
361.35	288.85			129.85			816.2		249.15	816.2
272.25	161.65			636			466.4		310.2	466.4
207.9	151.05			961.95			204.05		201.3	204.05
186.45	651.9			434.6			225.25		125.4	225.25
64.35	190.8			283.55			572.4		56.1	572.4
255.75	257.05			156.35			368.35		323.4	368.35
493.35	113.95			638.65			498.2		66	498.2
316.8	275.6			267.65			238.5		366.3	238.5
67.65	193.45			850.65			381.6		363	381.6
57.75	193.45			1036.15			1221.65		442.2	1221.65
212.85	217.3			726.1			551.2		102.3	551.2
135.3	161.65			280.9			471.7		110.55	471.7
168.3	413.4			238.5			219.95		67.65	219.95
399.3	143.1			469.05			106		184.8	106
140.25	196.1						212		75.9	212
202.95	159			622.75					125.4
120.45	243.8			559.15			304.75		217.8	304.75
148.5	241.15			124.55			535.3		178.2	535.3
516.45	153.7			490.25			416.05		80.85	416.05
339.9	156.35			119.25			288.85		117.15	288.85
156.75	106			161.65			519.4		136.95	519.4
59.4	174.9			530			132.5		161.7	132.5
84.15	196.1			617.45			614.8		382.8	614.8
128.7	100.7			1152.75			153.7		94.05	153.7
99	172.25			402.8			328.6		61.05	328.6
112.2	291.5			434.6			127.2		224.4	127.2
110.55	699.6			318			455.8		66	455.8
207.9				469.05			201.4		105.6	201.4
133.65	304.75			328.6			561.8		183.15	561.8
136.95	116.6			280.9			858.6		207.9	858.6
99	439.9			206.7			103.35		221.1	103.35
283.8	116.6			201.4			368.35			368.35
194.7	137.8			174.9			206.7		402.6	206.7
62.7	140.45			143.1			129.85		135.3	129.85
67.65	116.6			569.75			304.75		947.1	304.75
194.7	373.65			156.35			106		89.1	106
99	135.15			318			151.05		61.05	151.05
181.5	108.65			190.8			106		224.4	106
181.5	890.4			106			442.55		267.3	442.55
255.75	106			964.6			389.55		62.7	389.55
191.4	174.9			310.05			323.3		97.35	323.3
95.7	137.8			270.3			243.8		103.95	243.8
94.05	498.2			161.65			553.85		681.45	553.85
85.8	164.3			1060			378.95		123.75	378.95
226.05	431.95			121.9			262.35		561	262.35
165	108.65								285.45
438.9	164.3			670.45			302.1		602.25	302.1
432.3	439.9			1584.7			254.4		476.85	254.4
74.25	111.3			318			103.35		297	103.35
123.75	129.85			328.6			209.35		600.6	209.35
79.2	768.5			280.9			286.2		303.6	286.2
367.95	196.1		135.3	116.6			265		640.2	265
67.65	182.85		138.6	938.1			691.65		384.45	691.65
221.1	201.4		103.95	121.9			145.75		224.4	145.75
62.7	103.35		74.25	318			257.05		334.95	257.05
130.35	487.6		94.05	259.7			416.05		414.15	416.05
92.4	283.55		56.1				265		247.5	265
171.6	156.35		155.1				1489.3		140.25	1489.3
125.4	254.4		122.1				304.75		488.4	304.75
232.65	174.9		103.95				408.1		806.85	408.1
	198.75		112.2	238.5			341.85		417.45	341.85
678.15	312.7		70.95	151.05			561.8		326.7	561.8
318.45	508.8		140.25	325.95			1539.65		95.7	1539.65
66	177.55		150.15	111.3			156.35		301.95	156.35
59.4	169.6		135.3	190.8			567.1		679.8	567.1
755.7	108.65		72.6	108.65			230.55		379.5	230.55
72.6	230.55		102.3	397.5			159		89.1	159
123.75	119.25		85.8	151.05			111.3		297	111.3
113.85	153.7		202.95	429.3			153.7		275.55	153.7
184.8	331.25		97.35	519.4			916.9		432.3	916.9
95.7	243.8		155.1	206.7			233.2		132	233.2
433.95	113.95		57.75	678.4			214.65		204.6	214.65
62.7	1028.2		67.65	182.85					498.3
330	694.3		122.1	143.1			188.15		612.15	188.15
160.05	246.45		132	206.7			524.7		577.5	524.7
94.05	161.65		140.25	2130.6			1200.45		854.7	1200.45
122.1	185.5		136.95	328.6			100.7		414.15	100.7
516.45	108.65		64.35	325.95			617.45		173.25	617.45
102.3	217.3		257.4	530			855.95		349.8	855.95
84.15	233.2		105.6	678.4			771.15		82.5	771.15
133.65	153.7		141.9	318			1836.45		105.6	1836.45
136.95	113.95		136.95	296.8			402.8		310.2	402.8
112.2	148.4		102.3	235.85			620.1		189.75	620.1
267.3	151.05		61.05	312.7			959.3		605.55	959.3
120.45	121.9		75.9	185.5			291.5		89.1	291.5
135.3	132.5		89.1	291.5			389.55		196.35	389.55
222.75	190.8		107.25	514.1			392.2		371.25	392.2
64.35	681.05		348.15	103.35			938.1		206.25	938.1
138.6	461.1		82.5	190.8			209.35		66	209.35
136.95	116.6		209.55	206.7			394.85		146.85	394.85
399.3	103.35		59.4				477		331.65	477
297			67.65	185.5			1340.9		67.65	1340.9
211.2	1126.25		120.45	1452.2			371		108.9	371
113.85	368.35		90.75				466.4		143.55	466.4
331.65	164.3		62.7	246.45			704.9		315.15	704.9
214.5	646.6		128.7	116.6			325.95		303.6	325.95
196.35	219.95		75.9	908.95					67.65
235.95	106		130.35	731.4			320.65		168.3	320.65
272.25	588.3		117.15	251.75			214.65		615.45	214.65
240.9	111.3		209.55	233.2			993.75		150.15	993.75
146.85	233.2		69.3	172.25			169.6		62.7	169.6
239.25	190.8		64.35				503.5		62.7	503.5
254.1	169.6		94.05	302.1			408.1		244.2	408.1
105.6	137.8		184.8	262.35			577.7		57.75	577.7
158.4	363.05		67.65	190.8			405.45		782.1	405.45
117.15	111.3		92.4	683.7			185.5		313.5	185.5
158.4	318		64.35	111.3			206.7		346.5	206.7
61.05	153.7		110.55	765.85			956.65		125.4	956.65
511.5	1110.35		193.05	137.8			654.55		432.3	654.55
128.7	243.8		132	439.9			548.55		188.1	548.55
694.65	106		57.75	222.6			185.5		61.05	185.5
237.6	106		77.55	153.7			442.55		627	442.55
212.85	243.8		118.8	280.9			535.3		303.6	535.3
82.5	113.95		85.8	954			341.85		422.4	341.85
255.75	161.65		113.85	575.05			129.85		84.15	129.85
64.35	352.45		97.35	482.3			344.5		221.1	344.5
376.2	349.8		92.4	294.15			132.5		188.1	132.5
135.3	143.1		92.4	188.15			137.8		473.55	137.8
222.75	614.8		82.5	108.65			280.9		161.7	280.9
77.55	304.75		120.45	161.65			172.25		85.8	172.25
381.15	148.4		202.95	702.25			265		219.45	265
115.5	633.35		155.1	129.85			209.35		437.25	209.35
183.15	164.3		103.95	243.8			503.5		425.7	503.5
67.65	696.95		102.3	156.35			119.25		138.6	119.25
85.8	103.35		135.3	185.5			757.9		196.35	757.9
75.9	164.3		67.65	402.8			365.7		980.1	365.7
95.7	675.75		113.85	299.45			100.7		221.1	100.7
132	227.9		95.7	1287.9			166.95		176.55	166.95
	291.5		74.25	1009.65			145.75		298.65	145.75
	604.2		62.7	498.2			453.15			453.15
	140.45		107.25	681.05			522.05			522.05
	304.75		56.1	495.55			466.4			466.4
	108.65		92.4	503.5			622.75			622.75
	344.5		61.05	233.2			400.15			400.15
	161.65		69.3	201.4			447.85			447.85
	492.9		82.5				265			265
	212		77.55	296.8			707.55			707.55
	318		84.15	527.35			164.3			164.3
	182.85			217.3			185.5			185.5
	238.5		66	227.9			148.4			148.4
	437.25		125.4	185.5			400.15			400.15
			92.4	296.8
			67.65	132.5
			87.45	609.5
	212		85.8	214.65
	580.35		66	212			487.6
	365.7		80.85	222.6			439.9			487.6
	320.65		70.95	206.7			625.4			439.9
	103.35		69.3	214.65			103.35			625.4
	103.35		165	164.3			328.6			103.35
	702.25		84.15	431.95			590.95			328.6
	113.95		107.25	530			1091.8			590.95
	161.65		89.1	209.35			1049.4			1091.8
	824.15		79.2	198.75			665.15			1049.4
	349.8		141.9	588.3			116.6			665.15
	397.5		92.4	416.05			455.8			116.6
	376.3		66	206.7			1380.65			455.8
	291.5		72.6	543.25			1126.25			1380.65
	124.55		120.45	103.35			365.7			1126.25
	230.55		99	431.95			532.65			365.7
	985.8		103.95	431.95			969.9			532.65
	349.8		66	381.6			389.55			969.9
	447.85		84.15	781.75			257.05			389.55
	901		105.6	357.75			166.95			257.05
	318		59.4	400.15			614.8			166.95
	1118.3		94.05	127.2			572.4			614.8
	392.2		64.35	193.45			450.5			572.4
	219.95		84.15	376.3						450.5
	286.2		56.1	204.05			673.1
	559.15		117.15	278.25			1378			673.1
	511.45		95.7	347.15			832.1			1378
	471.7		59.4				384.25			832.1
	535.3		62.7	206.7			665.15			384.25
	214.65		61.05	153.7			161.65			665.15
	339.2		105.6	121.9			453.15			161.65
	323.3		118.8	119.25			614.8			453.15
	734.05		69.3	166.95			450.5			614.8
	230.55		66	227.9			424			450.5
	132.5		120.45	233.2			567.1			424
	312.7		136.95	127.2			283.55			567.1
	760.55		62.7	469.05			113.95			283.55
	296.8		153.45	209.35			349.8			113.95
	299.45		103.95	124.55			1505.2			349.8
	304.75		70.95	365.7			408.1			1505.2
	302.1		103.95	548.55			649.25			408.1
	190.8		94.05	394.85			1028.2			649.25
	172.25		196.35	177.55			132.5			1028.2
	119.25		163.35	182.85			275.6			132.5
	254.4		103.95	217.3			850.65			275.6
			92.4	408.1		282.15	169.6		80.85	850.65
	312.7		59.4	1380.65		85.8	818.85		100.65	169.6
	169.6		70.95	135.15		165	121.9		74.25	818.85
	225.25		75.9	119.25		202.95	858.6		97.35	121.9
	824.15		77.55	365.7		82.5	188.15		62.7	858.6
	516.75		160.05	249.1		214.5	124.55		112.2	188.15
	177.55		99	196.1		163.35	612.15		64.35	124.55
	254.4		145.2	212		402.6	246.45		66	612.15
	474.35		64.35			227.7	365.7		62.7	246.45
	381.6		84.15	238.5		176.55	903.65		123.75	365.7
	182.85		97.35	151.05		61.05	100.7		103.95	903.65
	463.75		102.3	325.95		285.45	617.45		148.5	100.7
	143.1		107.25	111.3		99	169.6		67.65	617.45
	620.1		158.4	190.8		103.95	360.4		94.05	169.6
	315.35		57.75	108.65		103.95	198.75		57.75	360.4
	233.2		99	397.5		226.05	487.6		97.35	198.75
	121.9		74.25	151.05		151.8	386.9		181.5	487.6
	265		66	429.3		211.2			313.5	386.9
	156.35		155.1	519.4		277.2	328.6		82.5
	855.95		115.5	206.7		113.85	816.2		410.85	328.6
	304.75		161.7	678.4		84.15	368.35		202.95	816.2
	249.1		85.8	182.85		562.65	180.2		376.2	368.35
	246.45		136.95	143.1		163.35	646.6		90.75	180.2
	339.2		115.5	206.7		318.45	371		85.8	646.6
	116.6		95.7	2130.6		123.75	424		287.1	371
	111.3		186.45	328.6		72.6	797.65		102.3	424
	797.65		87.45	325.95		67.65	119.25		201.3	797.65
	246.45			530		165	1110.35		102.3	119.25
	402.8		113.85	678.4		113.85	304.75		72.6	1110.35
	100.7		140.25	318		90.75	829.45		77.55	304.75
	270.3		176.55	296.8		283.8	895.7		74.25	829.45
	567.1		105.6	235.85		250.8	593.6		338.25	895.7
	156.35		80.85	312.7		178.2	434.6		321.75	593.6
	275.6		165	185.5		267.3	127.2		201.3	434.6
	384.25		70.95	291.5		77.55	431.95		132	127.2
	143.1		417.45	514.1		359.7	132.5		145.2	431.95
	463.75		77.55			120.45	832.1		127.05	132.5
	296.8		288.75	331.25		136.95	373.65		82.5	832.1
	193.45		79.2	156.35		174.9	784.4		138.6	373.65
	140.45		214.5	137.8		84.15	137.8		389.4	784.4
	257.05		103.95	416.05		150.15	283.55		102.3	137.8
	201.4		80.85	275.6		173.25	212		455.4	283.55
	249.1		61.05	320.65		232.65	172.25		87.45	212
	773.8		57.75	487.6		82.5	230.55		298.65	172.25
	882.45		245.85	233.2		174.9			394.35	230.55
	349.8		103.95	341.85		273.9	275.6		166.65
	310.05		84.15	323.3		176.55	418.7		308.55	275.6
	643.95		75.9			132	312.7		133.65	418.7
	368.35		136.95			118.8	259.7		272.25	312.7
	209.35		148.5			227.7	474.35		379.5	259.7
	143.1		66			359.7	100.7		199.65	474.35
	265		72.6			79.2	177.55		141.9	100.7
	726.1		59.4			75.9	689		679.8	177.55
	132.5		94.05			379.5	233.2		280.5	689
	394.85		204.6			169.95	325.95		66	233.2
	339.2		181.5			397.65	312.7		79.2	325.95
	121.9		64.35			397.65	771.15		150.15	312.7
			89.1			153.45	901		97.35	771.15
	108.65		72.6			549.45	249.1		186.45	901
	378.95		278.85			372.9	384.25		69.3	249.1
	325.95		138.6			255.75	1359.45		82.5	384.25
	341.85		67.65			217.8	227.9		64.35	1359.45
	424		100.65			90.75	251.75		79.2	227.9
	726.1		57.75			420.75	596.25			251.75
	135.15		77.55			95.7	561.8		344.85	596.25
	177.55		117.15			84.15	381.6		194.7	561.8
	275.6		122.1			184.8	214.65		125.4	381.6
	429.3		107.25			344.85	127.2		95.7	214.65
	355.1		57.75			207.9	641.3		84.15	127.2
	577.7		59.4			127.05	286.2		156.75	641.3
	166.95		80.85			62.7	310.05		219.45	286.2
	103.35		56.1			166.65	384.25		112.2	310.05
	283.55		66			108.9	341.85		169.95	384.25
	519.4					226.05	445.2		166.65	341.85
	646.6		212.85			143.55	100.7		107.25	445.2
	344.5		67.65			133.65	119.25		66	100.7
	294.15		163.35			216.15	262.35		82.5	119.25
	543.25		123.75			224.4	421.35		221.1	262.35
	214.65		328.35				251.75		117.15	421.35
57.75	193.45		163.35			128.7	408.1		168.3	251.75
61.05	333.9		166.65			173.25	908.95		80.85	408.1
181.5	227.9		89.1			145.2	718.15		64.35	908.95
59.4	1253.45		64.35	365.7		278.85	508.8		102.3	718.15
87.45	182.85		64.35	352.45		166.65	230.55		163.35	508.8
57.75	450.5		229.35	1539.65		123.75	177.55		80.85	230.55
66	119.25		209.55	111.3		191.4	222.6		120.45	177.55
171.6	352.45		99	569.75		140.25	124.55		75.9	222.6
70.95	283.55		67.65	121.9		481.8	318		264	124.55
59.4	320.65		219.45	1208.4		499.95	145.75		209.55	318
64.35	575.05		178.2	325.95		132	156.35		156.75	145.75
72.6	641.3		82.5	180.2		72.6	132.5		135.3	156.35
85.8	365.7		178.2	667.8		102.3			158.4	132.5
87.45	174.9		97.35	1094.45		377.85	445.2		150.15
66	103.35		115.5	455.8		226.05	408.1		202.95	445.2
166.65	241.15		174.9	588.3		108.9	365.7		290.4	408.1
87.45	145.75		75.9	646.6		99	575.05		67.65	365.7
123.75	119.25		115.5	908.95		338.25	508.8		122.1	575.05
115.5			77.55	113.95		132	381.6		113.85	508.8
74.25	272.95		99	108.65		158.4	294.15		97.35	381.6
61.05	620.1		133.65	789.7		374.55	482.3		107.25	294.15
179.85	251.75		108.9	1083.85		189.75	614.8		97.35	482.3
79.2	720.8		120.45	312.7		151.8	773.8		138.6	614.8
97.35	400.15		66	214.65		72.6	723.45		171.6	773.8
108.9	257.05		120.45	500.85		66	307.4		115.5	723.45
275.55	129.85		151.8			202.95	249.1		128.7	307.4
87.45	328.6		128.7	622.75		235.95	153.7		199.65	249.1
62.7	286.2		235.95	559.15		348.15	153.7		471.9	153.7
61.05	363.05		92.4	124.55		188.1	514.1		128.7	153.7
125.4	185.5		239.25	490.25		462	217.3		409.2	514.1
67.65	575.05		74.25	119.25		240.9	363.05		110.55	217.3
62.7	447.85		136.95	161.65		452.1	106		396	363.05
140.25	357.75		74.25	530		171.6	416.05		130.35	106
66	235.85		70.95	617.45		297	431.95		89.1	416.05
	315.35		84.15	1152.75		165	537.95		178.2	431.95
90.75	161.65		69.3	402.8		216.15	410.75		69.3	537.95
70.95	198.75		57.75	434.6		160.05	352.45		171.6	410.75
82.5	143.1		158.4	318		259.05	172.25		603.9	352.45
80.85	543.25		169.95	469.05		87.45	405.45		259.05	172.25
103.95	315.35		196.35	328.6		250.8	922.2		173.25	405.45
61.05	381.6		94.05	280.9		59.4	461.1		61.05	922.2
82.5	908.95		359.7	206.7		115.5	206.7		56.1	461.1
186.45	143.1		79.2	201.4		209.55	219.95			206.7
117.15	421.35		85.8	174.9		122.1	201.4		196.35	219.95
66	204.05		120.45	143.1		120.45	227.9		64.35	201.4
56.1	121.9		323.4	569.75		207.9	227.9		61.05	227.9
57.75	124.55		66	156.35		135.3	442.55		72.6	227.9
128.7	392.2		77.55	318		138.6	129.85		158.4	442.55
85.8	408.1		56.1	190.8		110.55	108.65		89.1	129.85
107.25	355.1		125.4	106		262.35	328.6		77.55	108.65
99	795		217.8	964.6		145.2	169.6		64.35	328.6
67.65	238.5		72.6	310.05		125.4	408.1		94.05	169.6
74.25	299.45		135.3	270.3		153.45			132	408.1
66	871.85		199.65	161.65		453.75	500.85		125.4
74.25	246.45		204.6	1060		283.8	325.95		136.95	500.85
110.55	254.4		95.7			202.95	111.3		259.05	325.95
272.25	302.1		153.45	188.15		130.35	180.2		75.9	111.3
72.6	628.05		580.8	670.45		74.25	384.25		61.05	180.2
62.7	188.15		132	1584.7		87.45	108.65		95.7	384.25
94.05	336.55		67.65	318		524.7	649.25		79.2	108.65
112.2	360.4		148.5	328.6		249.15	241.15		184.8	649.25
80.85	137.8		80.85	280.9		452.1	691.65		168.3	241.15
184.8	124.55		69.3	116.6		259.05	233.2		699.6	691.65
95.7	286.2		57.75	938.1		179.85	458.45		219.45	233.2
74.25	190.8		62.7	121.9		399.3	1404.5		100.65	458.45
107.25	386.9		158.4	318		224.4	164.3		118.8	1404.5
150.15	140.45		87.45	259.7		70.95			211.2	164.3
57.75	209.35		84.15			122.1	235.85		84.15
130.35	214.65		120.45	689		224.4	508.8		169.95	235.85
66	246.45		128.7	233.2		227.7	537.95		69.3	508.8
209.55	254.4			408.1		193.05	265		145.2	537.95
62.7	100.7		67.65	434.6		128.7	561.8		128.7	265
72.6	347.15		74.25	808.25		178.2	318		427.35	561.8
160.05	140.45		84.15	140.45		82.5	463.75		112.2	318
70.95			75.9	315.35		245.85	1014.95		285.45	463.75
92.4	127.2		75.9	1200.45		211.2	198.75		181.5	1014.95
151.8	437.25		70.95	445.2		105.6	262.35		105.6	198.75
70.95	214.65		229.35	267.65		61.05	400.15		70.95	262.35
87.45	429.3		105.6	156.35		143.55	352.45		92.4	400.15
214.5	182.85		72.6	739.35			116.6		105.6	352.45
145.2	137.8		255.75	283.55		135.3	620.1		135.3	116.6
290.4	198.75		57.75	447.85		95.7	408.1		150.15	620.1
84.15	787.05		133.65	190.8		99	689		92.4	408.1
79.2	177.55		103.95	696.95		75.9	386.9		82.5	689
118.8	212		107.25	323.3		136.95	649.25		115.5	386.9
178.2	106		168.3	381.6		161.7	108.65		59.4	649.25
75.9	283.55		87.45	1065.3		57.75	288.85		308.55	108.65
64.35	238.5		87.45	254.4		127.05	328.6		168.3	288.85
89.1	212		99	506.15		108.9	111.3		196.35	328.6
103.95	506.15		100.65	710.2		184.8	129.85		84.15	111.3
87.45	225.25		146.85	500.85		250.8	479.65		311.85	129.85
92.4	577.7		115.5	818.85		128.7	336.55		300.3	479.65
74.25	357.75		150.15	689		198	638.65		70.95	336.55
75.9	241.15		64.35	1823.2		169.95			72.6	638.65
148.5	193.45		82.5	174.9		90.75			188.1
87.45	230.55		99	143.1		278.85			74.25
64.35	227.9		57.75	511.45		108.9			176.55
77.55	193.45		113.85	471.7		130.35			57.75
66	153.7		186.45	238.5		391.05			257.4
133.65	323.3		133.65			89.1			57.75
186.45	765.85		57.75			214.5			161.7
92.4	116.6		130.35	405.45		70.95			255.75
56.1	243.8		57.75	288.85		255.75			75.9
75.9	394.85		94.05	535.3		77.55			339.9
193.05	108.65		74.25	495.55		148.5			262.35
99	614.8		70.95	283.55		268.95			259.05
62.7	132.5		57.75	206.7		74.25			425.7
72.6	156.35		80.85	129.85		259.05			174.9
70.95	135.15		410.85	251.75		178.2			75.9
56.1	985.8		66	225.25		214.5			84.15
57.75	196.1		264	405.45		143.55			110.55
	161.65		85.8	325.95		61.05			112.2
94.05	169.6		117.15	569.75		102.3
150.15	291.5		87.45	288.85		118.8			143.55
61.05	246.45		79.2	159		338.25			196.35
252.45	389.55		74.25	453.15		287.1			57.75
166.65	270.3		176.55	201.4		165			151.8
268.95	177.55		140.25	1862.95		224.4			79.2
143.55	188.15		103.95	103.35		209.55			110.55
122.1	384.25		69.3	339.2		69.3			102.3
303.6	193.45		145.2	254.4		138.6			87.45
128.7	225.25		94.05	106		94.05			168.3
163.35	151.05		89.1	291.5		268.95			166.65
82.5	736.7		99	914.25		465.3			79.2
232.65	198.75		140.25	198.75		188.1			110.55
84.15	742		85.8	108.65		95.7			90.75
87.45	108.65		110.55	280.9		222.75			57.75
95.7	214.65			166.95		658.35			133.65
92.4			64.35	344.5		178.2			74.25
61.05	784.4		61.05	315.35		232.65			136.95
146.85	201.4		691.35	212		183.15			298.65
130.35	143.1		84.15	108.65		110.55			198
138.6	190.8		95.7	188.15		245.85			108.9
135.3	402.8		212.85	193.45					79.2
85.8	106		66	575.05		153.45			59.4
193.05	405.45		115.5	259.7		412.5			240.9
75.9	193.45		57.75			117.15			222.75
77.55	694.3		133.65	784.4		198			161.7
74.25	410.75		100.65	267.65		57.75			202.95
72.6	124.55		85.8	530		442.2	294.15		107.25
100.65	323.3		82.5	180.2		61.05	103.35		158.4	294.15
61.05	177.55		61.05	654.55		148.5	376.3		82.5	103.35
161.7	161.65		75.9	103.35		151.8	100.7		77.55	376.3
103.95	103.35		231	312.7		226.05	172.25		80.85	100.7
95.7	286.2		67.65	328.6		70.95	964.6		105.6	172.25
70.95	795		734.25	408.1		202.95	604.2		99	964.6
62.7	259.7		56.1	590.95		128.7	484.95		84.15	604.2
107.25	265		56.1	233.2		212.85	143.1		103.95	484.95
193.05	265		79.2	238.5		161.7	249.1		56.1	143.1
99	455.8		153.45	106		125.4	132.5		158.4	249.1
301.95	196.1		56.1	304.75		178.2	373.65		69.3	132.5
135.3	251.75		57.75	924.85		156.75	508.8		57.75	373.65
69.3	344.5		112.2	137.8		191.4	726.1			508.8
130.35	193.45		105.6	185.5		72.6	214.65		239.25	726.1
117.15	280.9		173.25	572.4		219.45	781.75		105.6	214.65
120.45	230.55		178.2	768.5		396	628.05		146.85	781.75
112.2	259.7		66	333.9		199.65	341.85		140.25	628.05
122.1	643.95		87.45	381.6		290.4	137.8		244.2	341.85
153.45			90.75	212		475.2	410.75		209.55	137.8
79.2	657.2		72.6	288.85		252.45	490.25		480.15	410.75
75.9	1582.05		66	143.1		292.05	182.85		184.8	490.25
74.25	272.95		85.8	463.75		151.8	235.85		235.95	182.85
69.3	442.55		75.9	113.95		397.65	580.35		100.65	235.85
90.75	543.25		69.3	233.2		316.8	426.65		56.1	580.35
212.85	119.25		72.6	198.75		100.65	166.95		75.9	426.65
117.15	548.55		64.35	378.95		214.5	336.55		102.3	166.95
127.05	352.45		97.35	241.15		90.75	140.45		103.95	336.55
270.6	267.65		153.45	1396.55		123.75	193.45		79.2	140.45
209.55	325.95		57.75	426.65		163.35	233.2		72.6	193.45
80.85	453.15		85.8	394.85		110.55	368.35		95.7	233.2
103.95	182.85		97.35			226.05	495.55		64.35	368.35
62.7	254.4		61.05	201.4		136.95	196.1		171.6	495.55
72.6	477		82.5	381.6		313.5			72.6	196.1
57.75	381.6		74.25	842.7		462	121.9		115.5
118.8	357.75		66	193.45		196.35	596.25		158.4	121.9
57.75	530		70.95	262.35		89.1	137.8		198	596.25
367.95	585.65		75.9	113.95		259.05	389.55		219.45	137.8
107.25	347.15		528	280.9		140.25	156.35		140.25	389.55
163.35	182.85		69.3	1105.05		204.6	418.7		84.15	156.35
77.55	214.65		112.2	389.55		108.9	381.6		188.1	418.7
90.75	543.25		79.2	596.25		166.65	127.2		117.15	381.6
59.4	121.9		768.9	365.7		265.65	413.4		146.85	127.2
188.1	254.4		75.9	164.3		75.9	755.25		72.6	413.4
122.1	371			132.5		242.55	227.9		143.55	755.25
196.35	315.35		80.85	246.45		259.05	156.35		133.65	227.9
56.1	280.9		176.55	280.9		217.8	614.8		102.3	156.35
135.3	190.8		56.1	262.35		82.5	1433.65		85.8	614.8
62.7	129.85		179.85	1168.65		85.8	371		268.95	1433.65
82.5	286.2		77.55	121.9		163.35	328.6		70.95	371
79.2	463.75		108.9	137.8		85.8	108.65		57.75	328.6
130.35	336.55		87.45	100.7		267.3	389.55		92.4	108.65
100.65	100.7		61.05	492.9		120.45	185.5		146.85	389.55
57.75	235.85		70.95	164.3		429	124.55		178.2	185.5
70.95	254.4		118.8	145.75		254.1	545.9		66	124.55
103.95	349.8		108.9	251.75		118.8	408.1		113.85	545.9
94.05	270.3		135.3	257.05		94.05	394.85		155.1	408.1
82.5	143.1		120.45	294.15		123.75	254.4		100.65	394.85
74.25	238.5		59.4	151.05		212.85	174.9		75.9	254.4
97.35	193.45		100.65	137.8		138.6	357.75		74.25	174.9
72.6	474.35		77.55	180.2		62.7	270.3		100.65	357.75
107.25			56.1	964.6		125.4	291.5		118.8	270.3
94.05			69.3	275.6		128.7	413.4		95.7	291.5
89.1			90.75	625.4		179.85	137.8		77.55	413.4
163.35			107.25	389.55		198	365.7		67.65	137.8
70.95	890.4		59.4	106		70.95			70.95	365.7
90.75	164.3		90.75	339.2		123.75	270.3		67.65
110.55	283.55		701.25			130.35	315.35		102.3	270.3
79.2	129.85		79.2	484.95		56.1	278.25		61.05	315.35
62.7	551.2		69.3	1014.95			307.4		59.4	278.25
359.7	238.5		75.9	106		97.35	744.65		211.2	307.4
108.9	262.35		105.6	386.9		165	808.25		125.4	744.65
99	572.4		59.4	143.1		222.75	410.75		97.35	808.25
79.2	437.25		66	156.35		59.4	787.05		57.75	410.75
61.05	1330.3		57.75	159		103.95	405.45		242.55	787.05
70.95	121.9		66	222.6		194.7	808.25		61.05	405.45
217.8	418.7		87.45	551.2		125.4	328.6		99	808.25
56.1	243.8		84.15	405.45		138.6	781.75		122.1	328.6
151.8	219.95			106		146.85	166.95		70.95	781.75
202.95	447.85		128.7	156.35		260.7	1120.95		74.25	166.95
171.6	225.25		94.05	222.6		158.4	235.85		103.95	1120.95
103.95	113.95		61.05	137.8		189.75	530		77.55	235.85
74.25	198.75		61.05	651.9		100.65	389.55		90.75	530
	135.15		97.35	506.15		348.15	259.7			389.55
	312.7		57.75	339.2		660	636		123.75	259.7
	161.65		85.8	251.75		89.1	458.45		74.25	636
	278.25		67.65	119.25		235.95	336.55		84.15	458.45
62.7	257.05		67.65	100.7		94.05	813.55		80.85	336.55
115.5	100.7		79.2	217.3		92.4	251.75		84.15	813.55
90.75	1462.8		70.95	127.2		354.75			155.1	251.75
135.3	121.9		82.5	490.25		173.25	100.7		80.85
165	100.7		130.35	1372.7		110.55	159		67.65	100.7
194.7	251.75		56.1	180.2		122.1	161.65		80.85	159
100.65	235.85		122.1	161.65		179.85	394.85		69.3	161.65
244.2	124.55		90.75	182.85		249.15	341.85		120.45	394.85
143.55	164.3		102.3	307.4		316.8	734.05		140.25	341.85
87.45	333.9		62.7	222.6		59.4	243.8		77.55	734.05
113.85	646.6		62.7	940.75		176.55	1383.3		69.3	243.8
100.65	113.95		161.7	378.95		130.35	567.1		108.9	1383.3
186.45	516.75		102.3	148.4		242.55	577.7		59.4	567.1
249.15	113.95		75.9	238.5		173.25	108.65		198	577.7
165	304.75		79.2	137.8		415.8	331.25		70.95	108.65
97.35	119.25		99	458.45		189.75	164.3		90.75	331.25
108.9	241.15		123.75	288.85		245.85	259.7		112.2	164.3
62.7	426.65		61.05	103.35		128.7	569.75		74.25	259.7
191.4	209.35		57.75	461.1		72.6	172.25		59.4	569.75
229.35			57.75	514.1		259.05	302.1		216.15	172.25
211.2	323.3		133.65	129.85		70.95	1163.35		57.75	302.1
146.85	251.75		201.3	235.85		115.5	225.25		100.65	1163.35
201.3	153.7		143.55			61.05	219.95		105.6	225.25
100.65	453.15		77.55	365.7		107.25	408.1		118.8	219.95
247.5	204.05		56.1	217.3		188.1	156.35		110.55	408.1
399.3	148.4		67.65	127.2		115.5	416.05		66	156.35
158.4	172.25		80.85	413.4		178.2	614.8		84.15	416.05
198	124.55		67.65	169.6		57.75	193.45		75.9	614.8
216.15	106		64.35	424		259.05	259.7		163.35	193.45
186.45	148.4		107.25	190.8		127.05	670.45		100.65	259.7
66	421.35		72.6	233.2		165	164.3		133.65	670.45
178.2	895.7		290.4	119.25		160.05	172.25		90.75	164.3
100.65	243.8		89.1	103.35		273.9	238.5		66	172.25
346.5	127.2		64.35	649.25		59.4	312.7		79.2	238.5
72.6	132.5		57.75	553.85		168.3	172.25		207.9	312.7
235.95	609.5		56.1	318		245.85	689		72.6	172.25
112.2	344.5		84.15	201.4		66	111.3		70.95	689
193.05	318		127.05	2029.9		245.85	291.5		85.8	111.3
193.05	151.05		97.35	172.25		301.95	352.45		123.75	291.5
179.85	129.85		89.1	283.55		199.65	257.05		211.2	352.45
80.85	180.2		80.85			171.6	699.6		146.85	257.05
140.25	119.25		59.4	360.4		90.75	106		56.1	699.6
214.5	675.75		112.2	477		56.1	132.5		66	106
59.4	357.75		150.15	235.85			437.25		61.05	132.5
348.15	246.45		148.5	121.9		244.2			97.35	437.25
163.35	119.25		160.05	477		66	916.9		95.7
59.4	201.4		64.35	121.9		61.05	720.8		74.25	916.9
87.45	569.75		75.9	113.95		179.85	156.35		72.6	720.8
69.3	206.7		87.45	121.9		328.35	135.15		72.6	156.35
135.3	755.25		108.9	280.9		85.8	1319.7		120.45	135.15
204.6	416.05		59.4	100.7		94.05	140.45		110.55	1319.7
156.75	180.2		113.85	129.85		110.55	704.9		69.3	140.45
171.6	140.45		156.75	166.95		99	567.1		61.05	704.9
381.15	312.7		79.2	106		250.8	249.1		62.7	567.1
87.45	400.15		176.55	580.35		103.95	604.2		163.35	249.1
278.85	196.1		82.5	148.4		511.5	789.7		87.45	604.2
234.3	108.65		57.75	169.6		123.75	286.2		69.3	789.7
85.8	113.95			233.2		227.7	124.55			286.2
202.95	265		67.65	233.2		59.4	479.65			124.55
130.35	108.65		85.8	360.4		110.55	201.4			479.65
85.8	667.8		70.95	143.1		255.75	217.3		471.9	201.4
207.9	368.35		66	111.3		224.4	1484		135.3	217.3
242.55	286.2		95.7	548.55		120.45	278.25		145.2	1484
87.45	113.95		70.95	241.15		351.45	429.3		64.35	278.25
447.15	678.4		74.25	686.35		128.7	694.3		122.1	429.3
66	190.8		79.2	124.55		140.25	241.15		300.3	694.3
396	201.4		85.8	143.1		74.25	363.05		239.25	241.15
95.7	355.1		62.7	450.5		285.45	1820.55		293.7	363.05
179.85	129.85		72.6	302.1		85.8	275.6		295.35	1820.55
82.5	190.8		95.7	190.8		303.6	241.15		343.2	275.6
138.6	564.45		100.65	164.3		113.85	124.55		344.85	241.15
143.55	145.75		99	135.15		226.05	294.15		207.9	124.55
174.9	156.35		56.1	140.45		75.9	429.3		198	294.15
171.6	222.6		69.3	522.05		74.25	212		176.55	429.3
66	294.15		89.1	127.2		79.2	363.05		382.8	212
67.65	161.65		72.6	265		74.25	275.6		59.4	363.05
169.95			97.35	111.3		184.8	111.3		445.5	275.6
130.35	151.05		79.2	410.75		298.65	177.55		429	111.3
161.7	469.05		74.25	172.25		82.5			90.75	177.55
61.05	212		143.55	667.8		508.2	492.9		66
66	840.05		64.35	755.25		196.35	174.9		260.7	492.9
	177.55		77.55	127.2		84.15	357.75		275.55	174.9
97.35	106		61.05	469.05		429	556.5		207.9	357.75
176.55	251.75		186.45			103.95	113.95		574.2	556.5
193.05	421.35		69.3			92.4	153.7		196.35	113.95
155.1	106		217.8			318.45	132.5		59.4	153.7
209.55	111.3		103.95	304.75		94.05	1457.5		343.2	132.5
202.95	323.3		74.25	151.05		99	410.75		369.6	1457.5
108.9	368.35		140.25	148.4		212.85	121.9		224.4	410.75
94.05	678.4		56.1	230.55		89.1	172.25		372.9	121.9
146.85	113.95		79.2	349.8		115.5	498.2		673.2	172.25
115.5	103.35		61.05	299.45		475.2	151.05		443.85	498.2
127.05	156.35		141.9	151.05		153.45	376.3		711.15	151.05
85.8	654.55		107.25	206.7		80.85	484.95		305.25	376.3
123.75	174.9		79.2	779.1		89.1	113.95			484.95
87.45	140.45		128.7	636		227.7	307.4		56.1	113.95
122.1	204.05		123.75	447.85		169.95	455.8		262.35	307.4
234.3	140.45		90.75	556.5		216.15	670.45		171.6	455.8
366.3	124.55		69.3	233.2		77.55	124.55		491.7	670.45
132	177.55		171.6	816.2		252.45	792.35		321.75	124.55
89.1	177.55		70.95	795		128.7	400.15		524.7	792.35
85.8	188.15		56.1	190.8		153.45	386.9		320.1	400.15
103.95	129.85		99	235.85		490.05	1473.4		1221	386.9
239.25	100.7		82.5	381.6		128.7	119.25		132	1473.4
105.6	214.65		150.15	662.5		290.4	291.5		74.25	119.25
75.9			85.8	169.6		120.45	249.1		90.75	291.5
138.6	418.7		99	371		358.05	583		92.4	249.1
255.75	585.65		70.95	347.15		84.15	1242.85		318.45	583
70.95	325.95		77.55	1348.85		257.4	241.15		476.85	1242.85
305.25	106		80.85	572.4		158.4	116.6		424.05	241.15
87.45	219.95		221.1	302.1		80.85	137.8		189.75	116.6
240.9	196.1		125.4	156.35		191.4	106		67.65	137.8
171.6	137.8		59.4	341.85		166.65	108.65		366.3	106
338.25	140.45			328.6		61.05	140.45		343.2	108.65
77.55	196.1		95.7	620.1		165	620.1		400.95	140.45
325.05	214.65		85.8	402.8			739.35		409.2	620.1
224.4	217.3		196.35	145.75		115.5	363.05		161.7	739.35
184.8	177.55		62.7	116.6		120.45	212		120.45	363.05
212.85	540.6		123.75	609.5		247.5	119.25		158.4	212
115.5	103.35		153.45	275.6		64.35	553.85		318.45	119.25
184.8	424		128.7	331.25		298.65	553.85		501.6	553.85
122.1	204.05		56.1	145.75		250.8	121.9		90.75	553.85
361.35	355.1		70.95	431.95		559.35	826.8		202.95	121.9
268.95	185.5		59.4	416.05		67.65	283.55			826.8
199.65	124.55		62.7	267.65		168.3	219.95			283.55
140.25	718.15		125.4	235.85		113.85	349.8		99	219.95
496.65	113.95		85.8	259.7		153.45	657.2		61.05	349.8
158.4	153.7		95.7	779.1		132	164.3		250.8	657.2
394.35	424		72.6	243.8		259.05	371		244.2	164.3
94.05	286.2		61.05	450.5		532.95	241.15		435.6	371
107.25	341.85		82.5	137.8		97.35	445.2		577.5	241.15
181.5	453.15		186.45	299.45		234.3			432.3	445.2
374.55	113.95		69.3	336.55		70.95	132.5		633.6
90.75	100.7		82.5	270.3		178.2	376.3		249.15	132.5
386.1	156.35		67.65	394.85		419.1	272.95		94.05	376.3
141.9			97.35	257.05		202.95	124.55		130.35	272.95
153.45	299.45		310.2	121.9		427.35	537.95		77.55	124.55
133.65	103.35		235.95	548.55		132	196.1		146.85	537.95
237.6	267.65		72.6	132.5		77.55	227.9		216.15	196.1
161.7	100.7		56.1	161.65		56.1	386.9		504.9	227.9
150.15	996.4		77.55	209.35		216.15	119.25		117.15	386.9
107.25	418.7		57.75	310.05		306.9	355.1		526.35	119.25
140.25	368.35		89.1	140.45		211.2	119.25		348.15	355.1
95.7	633.35		70.95			297	153.7		268.95	119.25
244.2	734.05		122.1	185.5		150.15	219.95		72.6	153.7
151.8	166.95		99	124.55		262.35	453.15		66	219.95
141.9	620.1		95.7	177.55		282.15	392.2		394.35	453.15
168.3	312.7		82.5	209.35		191.4	567.1		92.4	392.2
77.55	106		67.65	172.25		207.9	408.1		960.3	567.1
133.65	174.9		97.35	885.1		169.95	267.65		772.2	408.1
295.35	405.45		77.55	755.25		231	336.55		227.7	267.65
163.35	304.75		135.3	169.6		69.3	124.55		565.95	336.55
128.7	249.1		113.85	204.05		92.4	278.25		270.6	124.55
166.65	219.95		82.5	378.95		207.9	514.1		75.9	278.25
123.75	567.1		56.1	103.35		146.85	217.3		330	514.1
87.45	212		630.3	241.15		87.45	413.4		1074.15	217.3
133.65	153.7		59.4	378.95		145.2	325.95		506.55	413.4
89.1	188.15		245.85	1044.1		146.85	381.6		191.4	325.95
145.2	111.3		136.95	209.35		181.5	270.3		247.5	381.6
120.45	251.75			204.05		74.25	389.55		70.95	270.3
297	257.05		105.6	511.45		105.6	389.55		658.35	389.55
74.25	710.2		201.3	159		57.75	418.7		389.4	389.55
165	127.2		397.65	111.3		108.9	373.65		155.1	418.7
110.55	241.15		75.9	204.05		97.35	116.6		85.8	373.65
160.05	230.55		64.35	312.7		94.05	400.15		110.55	116.6
140.25	143.1		480.15	328.6		133.65	164.3		394.35	400.15
62.7	124.55		110.55	318		196.35	100.7		118.8	164.3
82.5	129.85		138.6	172.25			206.7		361.35	100.7
97.35	392.2		85.8	145.75		283.8	127.2		631.95	206.7
97.35	280.9		77.55	575.05		118.8	121.9		435.6	127.2
135.3	254.4		102.3	646.6		130.35	938.1		59.4	121.9
	137.8		92.4	792.35		359.7	410.75		201.3	938.1
105.6	124.55		92.4	185.5		165	238.5		138.6	410.75
113.85	826.8		90.75	217.3		163.35	365.7		108.9	238.5
115.5	286.2		107.25	124.55		227.7	386.9		202.95	365.7
113.85	257.05		61.05	278.25		92.4	148.4		242.55	386.9
178.2			84.15	394.85		331.65	463.75		176.55	148.4
108.9	802.95		72.6	286.2		85.8	402.8		87.45	463.75
108.9	135.15		122.1	196.1		288.75	747.3		308.55	402.8
132	286.2		235.95	458.45		262.35	156.35		339.9	747.3
171.6	129.85		66	230.55		216.15			247.5	156.35
105.6	466.4		92.4	360.4		84.15	177.55		760.65
282.15	492.9		97.35	201.4		118.8	405.45		79.2	177.55
143.55	323.3		61.05	113.95		70.95	530		113.85	405.45
99	188.15		59.4	143.1		259.05	180.2		59.4	530
113.85	196.1		64.35	421.35		214.5	519.4		257.4	180.2
94.05	124.55		90.75	384.25		417.45	169.6		168.3	519.4
136.95	145.75		166.65	646.6		69.3	720.8		397.65	169.6
87.45	797.65		66	127.2		102.3	402.8		349.8	720.8
132	137.8		70.95	246.45		176.55	212		186.45	402.8
77.55	153.7		62.7	151.05		113.85	463.75		136.95	212
303.6	121.9		189.75	196.1		181.5	251.75		240.9	463.75
146.85	227.9		64.35	500.85		242.55	233.2		64.35	251.75
184.8	204.05		107.25	771.15		140.25	776.45		217.8	233.2
344.85	140.45		796.95	463.75		184.8	121.9		122.1	776.45
103.95	206.7		79.2	206.7		189.75	174.9		424.05	121.9
77.55	206.7		219.45	100.7		405.9	100.7		153.45	174.9
169.95	763.2		915.75	127.2		341.55	241.15		265.65	100.7
115.5	233.2		66	400.15		171.6	291.5		257.4	241.15
184.8	235.85		59.4	113.95		82.5	357.75		612.15	291.5
160.05	212		67.65	103.35		237.6	424		110.55	357.75
219.45	127.2		148.5	333.9		158.4	299.45		455.4	424
249.15	299.45		56.1	267.65		108.9	296.8		176.55	299.45
173.25	103.35		56.1	235.85		442.2	596.25		282.15	296.8
146.85	270.3		74.25	421.35		94.05	214.65		310.2	596.25
204.6	204.05		56.1	516.75		148.5	267.65		171.6	214.65
110.55	482.3		67.65			255.75	381.6		237.6	267.65
80.85	106		110.55	564.45		334.95	524.7		102.3	381.6
143.55	132.5		82.5	153.7		66	307.4		202.95	524.7
191.4	119.25		163.35	352.45		262.35	490.25		99	307.4
229.35	389.55		123.75	164.3		415.8	646.6		457.05	490.25
97.35	442.55		59.4	124.55		125.4	103.35		575.85	646.6
201.3	209.35		62.7	681.05		163.35	609.5		66	103.35
224.4	164.3			384.25		217.8	286.2		607.2	609.5
382.8	188.15			416.05		72.6	352.45		234.3	286.2
150.15	447.85			585.65		234.3	156.35		259.05	352.45
110.55	111.3			421.35		275.55	177.55		99	156.35
84.15	113.95			151.05		293.7	204.05		460.35	177.55
169.95	233.2			140.45		207.9	471.7		82.5	204.05
280.5	333.9			490.25		112.2	394.85		277.2	471.7
56.1	339.2			514.1			222.6		214.5	394.85
193.05	108.65			453.15			140.45		92.4	222.6
158.4	776.45			339.2		207.9	161.65		295.35	140.45
72.6	190.8			357.75		227.7	352.45		66	161.65
160.05	182.85			119.25		297	164.3		100.65	352.45
404.25	331.25			283.55		221.1	161.65		112.2	164.3
219.45				299.45		130.35	222.6			161.65
57.75	381.6			132.5		57.75	238.5		222.75	222.6
105.6	270.3			283.55		183.15	127.2		112.2	238.5
188.1	217.3			225.25		377.85	363.05		72.6	127.2
90.75	683.7			604.2		145.2	304.75		278.85	363.05
66	355.1			553.85		82.5	416.05		74.25	304.75
64.35	368.35			315.35		747.45	731.4		140.25	416.05
158.4	426.65			119.25		135.3	304.75		425.7	731.4
181.5	296.8			360.4		247.5	339.2		214.5	304.75
166.65	604.2			182.85		224.4	331.25		514.8	339.2
94.05	421.35			707.55		343.2			412.5	331.25
95.7	458.45			119.25		231			113.85
151.8	1902.7			137.8		399.3	193.45		506.55
282.15	153.7			299.45		130.35	893.05		59.4
66	392.2			506.15		399.3	251.75		249.15	193.45
163.35	1762.25			341.85		244.2	214.65		97.35	893.05
363	424			209.35		506.55	386.9		1092.3	251.75
90.75	763.2			323.3		89.1	246.45		254.1	214.65
320.1	341.85			577.7		326.7	633.35		234.3	386.9
130.35	315.35			259.7		435.6	1248.15		295.35	246.45
191.4	278.25			135.15		143.55	988.45		292.05	633.35
460.35	612.15			169.6		214.5	678.4		188.1	1248.15
95.7	251.75			643.95		328.35	371		280.5	988.45
97.35	132.5			201.4		481.8	681.05		466.95	678.4
118.8	166.95			596.25		118.8	119.25		462	371
82.5				508.8		452.1	373.65		442.2	681.05
69.3				108.65		283.8	389.55		1049.4	119.25
343.2				172.25		165	371		202.95	373.65
155.1	368.35			355.1		237.6	447.85		62.7	389.55
72.6	678.4		183.15	251.75		280.5	373.65		369.6	371
239.25	352.45		117.15	259.7		250.8	360.4		178.2	447.85
209.55	572.4		330	159		77.55	1131.55		344.85	373.65
143.55	201.4		280.5	312.7			781.75		574.2	360.4
136.95	140.45		140.25	129.85		199.65	394.85		361.35	1131.55
87.45	389.55		64.35	455.8		308.55	394.85		56.1	781.75
133.65	180.2		127.05	371		77.55	360.4		226.05	394.85
99	251.75		123.75	296.8			500.85		476.85	394.85
	787.05		222.75	336.55		171.6	583		254.1	360.4
174.9	288.85		244.2	156.35		67.65	307.4		391.05	500.85
115.5	124.55		219.45	270.3		277.2	310.05		198	583
140.25	352.45		156.75	217.3		198	323.3		466.95	307.4
148.5	132.5		128.7	214.65		273.9			371.25	310.05
75.9	352.45		173.25	108.65		245.85	575.05		523.05	323.3
82.5	360.4		211.2	116.6		341.55	540.6		688.05
59.4	217.3		282.15	230.55		108.9	140.45		600.6	575.05
132	267.65		77.55			201.3	429.3		92.4	540.6
163.35	159		135.3	561.8		57.75	270.3		508.2	140.45
57.75	156.35		179.85	201.4		107.25	227.9		1186.35	429.3
146.85	259.7		95.7	405.45		56.1	140.45		792	270.3
151.8	710.2		161.7	363.05		240.9	135.15		59.4	227.9
110.55	405.45		156.75	257.05		565.95	964.6		961.95	140.45
130.35	219.95		199.65	108.65		90.75	371		62.7	135.15
399.3	169.6		313.5	469.05		75.9	233.2		542.85	964.6
268.95	426.65		127.05	373.65		146.85	113.95		217.8	371
59.4	103.35		561	469.05		278.85	325.95		219.45	233.2
113.85	818.85		130.35	344.5		56.1	487.6		211.2	113.95
72.6	400.15		257.4	307.4		768.9	270.3		262.35	325.95
528	283.55		77.55	209.35		270.6	545.9		70.95	487.6
343.2	376.3		138.6	469.05		201.3	609.5		244.2	270.3
118.8	113.95		339.9	262.35		70.95	127.2		100.65	545.9
166.65	378.95		143.55	156.35		102.3	169.6		102.3	609.5
115.5	159		138.6	453.15		143.55	275.6		127.05	127.2
174.9			117.15	259.7		877.8	212		74.25	169.6
315.15	233.2		232.65	331.25		207.9	402.8		554.4	275.6
84.15	161.65		59.4	129.85		376.2	262.35		590.7	212
181.5	336.55		270.6	463.75		108.9	151.05		328.35	402.8
194.7	257.05		108.9	320.65		112.2	577.7		232.65	262.35
113.85	363.05		82.5	307.4		158.4	233.2		481.8	151.05
77.55	304.75		138.6	227.9		303.6	776.45		470.25	577.7
72.6	408.1		153.45	100.7		150.15	106		178.2	233.2
123.75	121.9		118.8	233.2		135.3	1226.95		102.3	776.45
69.3	251.75		325.05	392.2			617.45		457.05	106
82.5	291.5		336.6	132.5		196.35	119.25		838.2	1226.95
141.9	333.9		272.25	182.85		391.05	508.8		313.5	617.45
297	235.85		113.85	227.9		102.3	291.5		145.2	119.25
79.2	121.9		297	408.1		148.5	251.75		379.5	508.8
193.05	241.15		57.75	185.5		161.7	214.65		381.15	291.5
97.35	106		97.35	153.7		80.85	530		140.25	251.75
103.95	166.95		62.7	537.95		140.25	535.3		950.4	214.65
173.25	106		221.1	278.25		59.4	201.4		328.35	530
151.8	209.35		61.05	421.35		290.4	169.6		1093.95	535.3
107.25	151.05		143.55	450.5		141.9	132.5		367.95	201.4
221.1	352.45		62.7	357.75		297			194.7	169.6
108.9	238.5			145.75		89.1	286.2		108.9	132.5
138.6	304.75		183.15	808.25		128.7	283.55		72.6
201.3	209.35		62.7	222.6		194.7	103.35			286.2
133.65	1097.1		141.9	559.15		224.4	506.15		321.75	283.55
100.65	310.05		561	386.9		237.6	249.1		311.85	103.35
115.5	824.15		562.65	659.85		275.55	119.25		442.2	506.15
115.5	119.25		234.3	209.35		252.45	710.2		275.55	249.1
179.85	111.3		74.25	490.25		176.55	596.25		336.6	119.25
87.45	548.55		259.05	193.45		290.4	638.65		348.15	710.2
77.55	511.45		358.05	106		56.1	339.2		326.7	596.25
193.05			259.05	188.15		141.9	426.65		452.1	638.65
221.1	243.8		163.35	413.4		136.95	683.7		196.35	339.2
151.8	270.3		70.95	341.85		219.45	378.95		82.5	426.65
138.6	477		118.8	164.3		364.65	890.4		59.4	683.7
61.05	622.75		82.5	177.55		206.25	233.2		471.9	378.95
381.15	174.9		387.75	235.85		145.2	143.1		70.95	890.4
226.05	119.25		125.4	461.1		389.4	302.1		701.25	233.2
135.3	156.35		82.5	286.2		237.6	180.2		361.35	143.1
97.35	519.4		85.8	461.1		608.85	376.3		287.1	302.1
136.95	270.3		122.1	254.4		598.95	278.25		603.9	180.2
112.2	156.35		249.15	153.7		92.4	1555.55		100.65	376.3
216.15	270.3		122.1	243.8		130.35	148.4		99	278.25
95.7	344.5		123.75	943.4		404.25	259.7		818.4	1555.55
59.4	363.05		132	275.6		66	405.45		694.65	148.4
151.8	426.65		199.65	259.7		201.3	283.55		412.5	259.7
61.05	153.7		110.55	140.45		67.65	219.95		481.8	405.45
145.2	898.35		59.4	416.05		160.05	323.3		653.4	283.55
166.65	153.7		303.6	225.25		95.7	265		376.2	219.95
82.5	156.35		226.05	479.65		141.9	336.55		348.15	323.3
156.75	161.65		89.1	227.9		201.3	124.55		386.1	265
214.5	214.65		103.95	198.75		188.1	318		919.05	336.55
118.8	190.8		305.25	720.8		115.5	347.15		344.85	124.55
100.65	278.25		107.25	681.05		155.1	219.95		712.8	318
61.05	712.85		425.7	121.9		97.35	455.8		404.25	347.15
79.2	209.35		130.35	262.35		410.85	233.2		338.25	219.95
89.1	182.85		298.65			62.7	196.1		549.45	455.8
	1012.3		94.05			179.85	249.1		414.15	233.2
146.85	166.95		366.3			260.7	355.1		463.65	196.1
252.45	108.65		74.25			290.4	967.25		429	249.1
143.55	121.9		70.95	349.8		369.6	519.4		589.05	355.1
117.15	188.15		171.6	381.6		169.95	336.55		89.1	967.25
227.7	975.2		69.3	159		57.75	233.2		645.15	519.4
67.65	318		364.65	204.05			169.6		508.2	336.55
69.3	328.6		105.6	604.2		75.9	304.75		628.65	233.2
87.45	495.55		128.7	307.4		141.9	389.55		501.6	169.6
217.8	159		212.85	241.15		90.75	368.35		186.45	304.75
179.85	471.7		85.8	294.15		132	500.85		374.55	389.55
102.3	227.9		113.85	135.15		762.3	124.55		161.7	368.35
648.45	299.45		290.4	1044.1		226.05	453.15		297	500.85
206.25	265		105.6	153.7		224.4	161.65		569.25	124.55
254.1	193.45		204.6	567.1		473.55	569.75		638.55	453.15
148.5				177.55		333.3	140.45		851.4	161.65
97.35	227.9		66	116.6		132			353.1	569.75
102.3	696.95		285.45	164.3		85.8	214.65		56.1	140.45
224.4	742		112.2	206.7		301.95	214.65		2186.25
199.65	106		66	113.95		135.3	389.55		838.2	214.65
145.2	320.65		207.9	209.35		358.05	259.7		462	214.65
386.1	643.95		57.75	124.55		64.35	307.4		580.8	389.55
184.8	2279		74.25	310.05		135.3	166.95		391.05	259.7
105.6	516.75		74.25	143.1		85.8	166.95		577.5	307.4
346.5			72.6	145.75		70.95	545.9		194.7	166.95
151.8	673.1		189.75	347.15		282.15	188.15		706.2	166.95
80.85	325.95		105.6	119.25		110.55	174.9		193.05	545.9
87.45	294.15		95.7	241.15		224.4	442.55		349.8	188.15
89.1	689		57.75	182.85		240.9	148.4		556.05	174.9
69.3	469.05		161.7	1086.5		64.35	434.6		536.25	442.55
122.1	283.55		107.25	164.3		438.9	498.2		486.75	148.4
70.95	429.3		143.55	201.4		127.05	278.25		547.8	434.6
275.55	153.7		62.7	129.85		77.55	238.5		257.4	498.2
84.15			85.8	230.55		148.5	363.05		145.2	278.25
61.05	1041.45		234.3			165	315.35		531.3	238.5
161.7	166.95		117.15	217.3		67.65	196.1		485.1	363.05
64.35	267.65		155.1	129.85		77.55	887.75		344.85	315.35
90.75	381.6		128.7	219.95		244.2	214.65		107.25	196.1
122.1	667.8		87.45	511.45		64.35	222.6		148.5	887.75
184.8	413.4		94.05	585.65		115.5			452.1	214.65
118.8	108.65		85.8	368.35		339.9	686.35			222.6
429	267.65		64.35	180.2		160.05	119.25		117.15
108.9	461.1		123.75	124.55		166.65	447.85		684.75	686.35
74.25	378.95		202.95	519.4		181.5	625.4		343.2	119.25
255.75	159		72.6	636		112.2	511.45		737.55	447.85
105.6	402.8		176.55	392.2		155.1	596.25		74.25	625.4
541.2	288.85		56.1	124.55		160.05	196.1		67.65	511.45
132	532.65		74.25	357.75		148.5	681.05		1168.2	596.25
61.05	201.4		409.2	190.8		183.15	164.3		99	196.1
153.45	227.9		252.45	111.3		186.45	887.75		105.6	681.05
250.8	111.3		80.85	336.55		69.3	720.8		94.05	164.3
206.25	190.8		87.45	193.45			196.1		118.8	887.75
102.3	384.25		592.35	174.9		242.55	458.45		693	720.8
165	235.85		204.6	103.35		59.4	606.85		115.5	196.1
145.2	156.35		100.65	204.05		265.65	551.2		74.25	458.45
59.4	265		222.75	116.6		155.1	188.15		70.95	606.85
85.8	336.55		188.1	426.65		189.75	686.35		503.25	551.2
75.9	341.85		168.3	227.9		782.1	129.85		790.35	188.15
132	113.95		173.25	206.7		235.95	437.25		277.2	686.35
255.75	119.25		59.4	259.7		66	206.7		84.15	129.85
273.9	479.65		146.85	196.1		67.65	413.4		193.05	437.25
163.35	307.4		57.75	182.85		231	373.65		176.55	206.7
64.35	296.8		341.55	447.85		153.45	225.25		72.6	413.4
84.15	710.2		77.55	111.3		181.5	625.4		85.8	373.65
138.6	299.45		132	156.35		184.8	598.9		562.65	225.25
216.15	779.1		178.2	1038.8		255.75	514.1		77.55	625.4
84.15	540.6		118.8	124.55		196.35	363.05		600.6	598.9
117.15	1287.9		59.4	185.5		206.25	151.05		118.8	514.1
100.65	180.2		156.75	328.6		87.45	373.65		495	363.05
465.3	352.45		174.9	116.6		410.85	153.7		513.15	151.05
318.45	628.05		211.2	108.65		132			232.65	373.65
92.4	219.95		174.9	124.55		69.3	328.6		100.65	153.7
193.05	318		268.95	299.45		77.55	140.45		310.2
300.3	394.85		202.95			229.35	238.5		245.85	328.6
66	108.65		128.7	400.15		125.4	164.3		501.6	140.45
75.9	132.5		191.4	219.95		108.9	341.85		646.8	238.5
94.05	111.3		67.65	127.2		282.15	188.15		268.95	164.3
102.3	328.6		87.45	135.15		99	116.6		160.05	341.85
85.8	233.2		235.95	1028.2		56.1	389.55		455.4	188.15
94.05	426.65		128.7	132.5		255.75	325.95		194.7	116.6
89.1	249.1		198	299.45		62.7	678.4		346.5	389.55
			127.05	188.15		412.5	246.45		166.65	325.95
191.4	246.45		69.3	156.35		100.65	119.25		222.75	678.4
85.8	291.5		155.1	431.95		113.85	596.25		174.9	246.45
125.4	140.45		62.7	657.2		287.1	119.25		1056	119.25
158.4	310.05		247.5	267.65		179.85	765.85		127.05	596.25
226.05	368.35		117.15	137.8		234.3	416.05		168.3	119.25
80.85	606.85		80.85	633.35		125.4	389.55		130.35	765.85
292.05	111.3		84.15	106		433.95	355.1		226.05	416.05
99	280.9			161.65		100.65	386.9		123.75	389.55
82.5	246.45		67.65	206.7		56.1	288.85		270.6	355.1
202.95	140.45		57.75	196.1		117.15	124.55		245.85	386.9
212.85	164.3		447.15	368.35		95.7	106		339.9	288.85
72.6	569.75		66	148.4		166.65	1115.65		221.1	124.55
70.95	103.35		264	172.25		133.65	283.55		272.25	106
202.95	249.1		128.7	768.5		66	103.35		417.45	1115.65
206.25	272.95		66	177.55		325.05	209.35		141.9	283.55
354.75	339.2		132	895.7			288.85		301.95	103.35
209.55	198.75		120.45	193.45		237.6	100.7		915.75	209.35
110.55	283.55		74.25	710.2		219.45	121.9		582.45	288.85
67.65	103.35		95.7	198.75		80.85	665.15		539.55	100.7
115.5	527.35		69.3	312.7		183.15	280.9		150.15	121.9
145.2	182.85		70.95			273.9	182.85		183.15	665.15
292.05	151.05		113.85	278.25		198	161.65		478.5	280.9
189.75	206.7		117.15	241.15		132	649.25		367.95	182.85
140.25	164.3		186.45	341.85		227.7	294.15		138.6	161.65
59.4	341.85		179.85	787.05		133.65	249.1		354.75	649.25
409.2	416.05		351.45	113.95		186.45	922.2		278.85	294.15
128.7	267.65		211.2	307.4		56.1			80.85	249.1
194.7	257.05		211.2	553.85		66	400.15		379.5	922.2
260.7	378.95		59.4	124.55		415.8	545.9		171.6
148.5	193.45		113.85	463.75		189.75	177.55		1239.15	400.15
143.55	111.3		122.1	1574.1		75.9	1544.95		85.8	545.9
156.75	299.45		82.5	206.7		201.3	577.7		77.55	177.55
358.05	238.5		130.35	116.6		122.1	148.4		333.3	1544.95
168.3	212		89.1	161.65		66	238.5		501.6	577.7
75.9	429.3		245.85	159		103.95	214.65		275.55	148.4
313.5	588.3		80.85	241.15		72.6	249.1		394.35	238.5
412.5	397.5		156.75	137.8		666.6	333.9		270.6	214.65
297	1274.65		169.95	172.25		232.65	161.65		231	249.1
397.65	185.5		110.55	180.2		330	151.05		244.2	333.9
455.4	296.8		260.7	405.45		656.7	771.15		313.5	161.65
64.35	471.7		59.4	116.6		151.8	103.35		222.75	151.05
57.75	323.3		69.3	577.7		211.2	270.3		207.9	771.15
107.25	434.6		122.1	742		556.05	291.5		552.75	103.35
130.35	368.35		204.6	1791.4		252.45	837.4		87.45	270.3
199.65	119.25		145.2	251.75		292.05	196.1		249.15	291.5
169.95			64.35	405.45		125.4	643.95		92.4	837.4
132			103.95	299.45		59.4	503.5		361.35	196.1
117.15			82.5	333.9		410.85	159		617.1	643.95
75.9			168.3	108.65		59.4	882.45		300.3	503.5
117.15			153.45	100.7		221.1	651.9		278.85	159
125.4			72.6	810.9		536.25			90.75	882.45
66			77.55	598.9		89.1	214.65		349.8	651.9
201.3			173.25	617.45		272.25	254.4		143.55
74.25			136.95	113.95		282.15	108.65		242.55	214.65
110.55			87.45	132.5		209.55	633.35		150.15	254.4
115.5			92.4	683.7		519.75	482.3		92.4	108.65
173.25			199.65	373.65		160.05	129.85		1153.35	633.35
252.45			82.5	296.8		260.7	129.85		295.35	482.3
290.4			115.5	140.45		107.25	943.4		183.15	129.85
132			148.5	620.1		206.25	312.7		663.3	129.85
160.05			100.65	638.65		87.45	214.65		262.35	943.4
270.6			103.95	219.95		66	140.45		1833.15	312.7
130.35			188.1	339.2		123.75	166.95		133.65	214.65
100.65			145.2	243.8		169.95	352.45		594	140.45
			155.1	551.2		92.4	227.9		61.05	166.95
79.2			74.25	204.05		143.55	484.95		273.9	352.45
531.3			57.75	193.45		290.4	257.05		226.05	227.9
90.75			188.1	397.5		202.95	312.7		219.45	484.95
153.45			110.55	265		123.75			82.5	257.05
117.15			151.8			113.85			56.1	312.7
72.6			84.15	344.5		110.55			201.3
113.85			169.95	108.65		168.3			310.2
902.55			235.95	577.7		173.25			250.8
315.15			249.15	272.95		196.35	318		82.5
595.65			66	233.2			145.75
72.6			74.25	198.75		130.35	111.3		202.95	318
155.1			188.1	156.35		163.35	174.9		475.2	145.75
112.2			158.4	439.9		237.6	288.85		361.35	111.3
211.2			89.1	620.1		226.05	503.5		89.1	174.9
193.05			75.9			183.15	484.95		92.4	288.85
264			92.4			127.05	471.7		64.35	503.5
234.3			108.9			108.9	312.7		300.3	484.95
262.35			97.35			297	127.2		397.65	471.7
92.4						102.3	100.7		237.6	312.7
92.4						62.7	222.6		136.95	127.2
64.35						128.7	392.2		70.95	100.7
275.55						117.15	262.35		458.7	222.6
59.4			194.7			204.6	286.2		330	392.2
141.9			59.4			77.55	853.3		420.75	262.35
132			163.35			344.85	389.55		668.25	286.2
882.75			64.35			120.45	333.9		69.3	853.3
97.35			85.8			252.45	349.8		113.85	389.55
110.55			103.95			62.7	392.2		168.3	333.9
87.45			161.7			107.25	479.65		427.35	349.8
105.6			146.85			397.65	352.45		150.15	392.2
120.45			97.35			204.6	124.55		334.95	479.65
214.5			72.6			90.75	567.1		364.65	352.45
110.55			85.8			156.75	219.95		410.85	124.55
87.45			136.95			153.45	180.2		562.65	567.1
102.3			66			536.25	479.65		62.7	219.95
107.25			57.75			174.9	930.15		160.05	180.2
194.7			100.65			169.95	251.75		232.65	479.65
358.05			70.95			549.45	254.4		541.2	930.15
110.55			103.95			199.65	259.7		249.15	251.75
399.3			171.6			59.4	598.9		166.65	254.4
155.1			74.25			87.45	1094.45		660	259.7
202.95			69.3			280.5	198.75		339.9	598.9
163.35			103.95			100.65	214.65		148.5	1094.45
132			99			160.05	206.7		990	198.75
97.35			77.55			275.55	209.35		374.55	214.65
117.15			79.2			194.7	196.1		278.85	206.7
260.7			79.2			59.4	174.9		97.35	209.35
70.95			75.9			75.9	866.55		491.7	196.1
122.1			57.75			113.85	193.45		316.8	174.9
74.25			59.4			217.8	869.2		184.8	866.55
			108.9			64.35	821.5		539.55	193.45
270.6			161.7			133.65	291.5		536.25	869.2
179.85			77.55			95.7	288.85		196.35	821.5
122.1			69.3			297	567.1		130.35	291.5
125.4			102.3			349.8	744.65		524.7	288.85
234.3			87.45			244.2	121.9		209.55	567.1
146.85			120.45			366.3	593.6		95.7	744.65
270.6			160.05			293.7	585.65		264	121.9
100.65			79.2			133.65	328.6		150.15	593.6
90.75			74.25			148.5	490.25		265.65	585.65
94.05			102.3			273.9	254.4		325.05	328.6
69.3			59.4			138.6	389.55		132	490.25
69.3			85.8			153.45	397.5		209.55	254.4
90.75			72.6			125.4	588.3			389.55
90.75			97.35			178.2	630.7			397.5
135.3			64.35			67.65	392.2			588.3
209.55			103.95			148.5	193.45			630.7
174.9			113.85	270.3		97.35	519.4			392.2
110.55			99	262.35		89.1	294.15			193.45
67.65			90.75	307.4			402.8			519.4
74.25			89.1	243.8			341.85			294.15
103.95			221.1	257.05			214.65			402.8
166.65			62.7	129.85			198.75			341.85
169.95			103.95	212			132.5			214.65
102.3			61.05	280.9						198.75
221.1			87.45	212			151.05			132.5
290.4			100.65	225.25			275.6
100.65			87.45	214.65			140.45			151.05
295.35			107.25	153.7			696.95			275.6
163.35			69.3	233.2			193.45			140.45
275.55			61.05	540.6			1168.65			696.95
117.15			67.65	254.4			265			193.45
127.05			57.75	121.9			172.25			1168.65
145.2			127.05	156.35			188.15			265
132			99	376.3			206.7			172.25
168.3			79.2	378.95			771.15			188.15
191.4			64.35	262.35			196.1			206.7
148.5			57.75	153.7			288.85			771.15
97.35			103.95	347.15			384.25			196.1
283.8			199.65	408.1			227.9			288.85
59.4	182.85		74.25	352.45			712.85			384.25
229.35	1017.6			113.95			124.55			227.9
866.25	376.3		94.05	145.75			127.2			712.85
67.65	113.95		79.2	132.5			209.35			124.55
62.7	204.05		323.4	357.75			241.15			127.2
66	318		75.9	392.2			296.8			209.35
165	204.05		77.55	108.65			318			241.15
338.25	352.45		130.35	270.3			106			296.8
95.7	442.55		70.95	421.35			1004.35			318
273.9	106		122.1	363.05			225.25			106
66	161.65		344.85	127.2			477			1004.35
130.35	161.65		145.2	312.7			296.8			225.25
151.8	193.45		161.7	121.9			394.85			477
145.2	106		193.05	238.5			161.65			296.8
216.15	100.7		64.35	487.6			204.05			394.85
118.8	275.6		105.6	177.55			320.65			161.65
141.9	180.2		61.05	241.15			106			204.05
226.05	196.1		118.8	108.65			180.2			320.65
90.75	124.55		100.65	315.35			230.55			106
95.7	1449.55		112.2	265			352.45			180.2
179.85	132.5		146.85	484.95			315.35			230.55
262.35	180.2		70.95	180.2			214.65			352.45
57.75	106		122.1	188.15			524.7			315.35
100.65	143.1		66	270.3			310.05			214.65
70.95	135.15		176.55	198.75			254.4			524.7
150.15	381.6		141.9	408.1			424			310.05
457.05	371		72.6	106			124.55		156.75	254.4
308.55	164.3		72.6	278.25			288.85		257.4	424
117.15	159		113.85	299.45			222.6		193.05	124.55
107.25	458.45		110.55	333.9			397.5		72.6	288.85
117.15	376.3		89.1	299.45			477		80.85	222.6
546.15	161.65		94.05	206.7			265		56.1	397.5
158.4	257.05		59.4	246.45			450.5		135.3	477
165	116.6		79.2	272.95			312.7		166.65	265
209.55	484.95		90.75	254.4			214.65		171.6	450.5
165	164.3		255.75	238.5					201.3	312.7
207.9	151.05		99	265			744.65		100.65	214.65
75.9	111.3		189.75	246.45			238.5		72.6
173.25	106		72.6	113.95			251.75		56.1	744.65
191.4	318		113.85	487.6			235.85		168.3	238.5
69.3			62.7	323.3			246.45		103.95	251.75
	219.95		278.85	275.6			153.7		176.55	235.85
	1075.9		92.4	408.1			328.6		153.45	246.45
	193.45		84.15	461.1			132.5		165	153.7
	127.2		70.95	286.2			230.55		133.65	328.6
69.3	145.75		112.2	108.65			275.6		57.75	132.5
158.4	901		61.05	310.05			675.75		61.05	230.55
168.3	156.35		95.7	127.2			177.55		252.45	275.6
61.05	331.25		74.25	307.4			455.8		94.05	675.75
178.2	148.4		90.75	108.65			500.85		84.15	177.55
74.25	357.75		72.6	235.85			222.6		168.3	455.8
59.4	461.1		511.5	341.85			325.95		145.2	500.85
70.95	487.6		70.95				161.65		94.05	222.6
74.25	275.6		74.25	151.05			487.6		56.1	325.95
77.55	863.9		127.05	119.25			272.95		67.65	161.65
72.6	363.05		70.95	466.4			103.35		122.1	487.6
66	270.3		69.3	246.45			103.35		108.9	272.95
199.65	106		61.05	280.9			341.85		57.75	103.35
64.35	421.35		59.4	196.1			384.25		153.45	103.35
67.65	169.6		74.25	161.65			262.35		181.5	341.85
79.2	347.15		163.35	180.2			113.95		75.9	384.25
56.1	1219		122.1	182.85			193.45		74.25	262.35
105.6	325.95		77.55	511.45			113.95		85.8	113.95
99	124.55		174.9	498.2			103.35		89.1	193.45
87.45	477		67.65	113.95			225.25		66	113.95
193.05	113.95		130.35	413.4			251.75		84.15	103.35
191.4	172.25		123.75	198.75			201.4		87.45	225.25
57.75	100.7		69.3	484.95			124.55		67.65	251.75
77.55	243.8		79.2	355.1			551.2		150.15	201.4
84.15	212		115.5	410.75			389.55		80.85	124.55
297			107.25	357.75			100.7		90.75	551.2
61.05	365.7		94.05				113.95		100.65	389.55
132	140.45		61.05				280.9		107.25	100.7
102.3	121.9		66				201.4		272.25	113.95
82.5	461.1		77.55				572.4		70.95	280.9
128.7	145.75		64.35				129.85		191.4	201.4
75.9	315.35		75.9				402.8		97.35	572.4
146.85	320.65		57.75				172.25		179.85	129.85
72.6	405.45		146.85				384.25		146.85	402.8
82.5	106		62.7				328.6		64.35	172.25
103.95	765.85		64.35				511.45		130.35	384.25
75.9	503.5		67.65				100.7		94.05	328.6
61.05	151.05						257.05		108.9	511.45
85.8	429.3		493.35				524.7		138.6	100.7
107.25	371		188.1				108.65		141.9	257.05
94.05	185.5		112.2				347.15		120.45	524.7
145.2	225.25		57.75				312.7		135.3	108.65
89.1	121.9		123.75				368.35		267.3	347.15
227.7	174.9		64.35				113.95		57.75	312.7
123.75	299.45		82.5				153.7		117.15	368.35
62.7	490.25		62.7				119.25		113.85	113.95
143.55	336.55		105.6				416.05		348.15	153.7
163.35	129.85		70.95				283.55		85.8	119.25
239.25	116.6		219.45				143.1		244.2	416.05
75.9	344.5		145.2				511.45		59.4	283.55
61.05	270.3		103.95				421.35		56.1	143.1
194.7	151.05		247.5				219.95		115.5	511.45
69.3	156.35		123.75				487.6		69.3	421.35
80.85	1627.1		89.1				381.6		75.9	219.95
359.7	185.5		138.6				288.85		110.55	487.6
102.3	121.9		90.75				288.85		89.1	381.6
82.5	129.85		67.65				225.25		262.35	288.85
87.45	325.95		95.7				283.55		301.95	288.85
79.2	164.3		102.3				148.4		222.75	225.25
622.05	129.85		66				222.6		115.5	283.55
146.85	206.7		166.65				474.35		141.9	148.4
402.6	450.5		219.45				755.25		278.85	222.6
70.95	222.6		62.7				288.85		112.2	474.35
66			67.65				212		67.65	755.25
74.25	540.6		102.3				185.5		168.3	288.85
	506.15		122.1				341.85		70.95	212
112.2	172.25		89.1						115.5	185.5
168.3	1073.25		176.55				129.85		219.45	341.85
618.75	288.85		112.2				106		82.5
103.95	861.25		62.7				336.55		115.5	129.85
80.85	310.05		183.15				219.95		79.2	106
59.4	151.05		75.9				174.9			336.55
240.9	227.9		94.05				871.85		105.6	219.95
99	720.8		59.4				204.05		283.8	174.9
66	108.65		110.55				349.8		125.4	871.85
168.3	116.6		138.6				111.3		189.75	204.05
127.05	532.65		153.45				424		183.15	349.8
280.5	166.95		103.95				479.65		57.75	111.3
105.6	331.25		120.45				696.95		194.7	424
226.05	437.25		59.4				212		293.7	479.65
79.2	720.8		69.3				363.05		268.95	696.95
242.55	151.05		57.75				164.3		118.8	212
123.75	206.7		70.95				389.55		66	363.05
115.5	477		99				151.05		113.85	164.3
77.55	1081.2		56.1				129.85		140.25	389.55
648.45	537.95		146.85				286.2		80.85	151.05
135.3	193.45		64.35				135.15		80.85	129.85
66	763.2		56.1				392.2		102.3	286.2
77.55	190.8		56.1				129.85		222.75	135.15
356.4	426.65		92.4				172.25		244.2	392.2
118.8	129.85						103.35		120.45	129.85
102.3	863.9		169.95				278.25		123.75	172.25
100.65	119.25		122.1				193.45		231	103.35
72.6	429.3		82.5				344.5		184.8	278.25
123.75	524.7		105.6				556.5		85.8	193.45
166.65	392.2		57.75				151.05		127.05	344.5
336.6	474.35		132				185.5		277.2	556.5
56.1			67.65				405.45		150.15	151.05
130.35	471.7		123.75				405.45		171.6	185.5
70.95	495.55		94.05				344.5		226.05	405.45
87.45	156.35		280.5				161.65		136.95	405.45
69.3	124.55		99				625.4		72.6	344.5
85.8	127.2		103.95				294.15		67.65	161.65
61.05	609.5		89.1				182.85		219.45	625.4
341.55	214.65		62.7				363.05		136.95	294.15
113.85	233.2		84.15				148.4		174.9	182.85
85.8	294.15		67.65				445.2		148.5	363.05
113.85	742		59.4				940.75		84.15	148.4
59.4	188.15		138.6				402.8		66	445.2
80.85	241.15		75.9				148.4		202.95	940.75
66	190.8		66				593.6		64.35	402.8
59.4	484.95		89.1				151.05		72.6	148.4
59.4	371		70.95				458.45		146.85	593.6
118.8	113.95		143.55				106		155.1	151.05
128.7	816.2		64.35				129.85		102.3	458.45
130.35	675.75		99				339.2		100.65	106
97.35	137.8		56.1				296.8		150.15	129.85
130.35	344.5		59.4				429.3		108.9	339.2
100.65	1370.05		66				726.1		118.8	296.8
72.6	204.05		61.05				243.8		138.6	429.3
80.85	196.1		56.1				453.15		306.9	726.1
178.2	140.45		57.75				291.5		288.75	243.8
69.3	286.2		61.05				405.45		79.2	453.15
102.3	381.6		57.75				222.6		193.05	291.5
87.45	704.9		92.4				1007		102.3	405.45
199.65	278.25		102.3				111.3		128.7	222.6
143.55	471.7		69.3				164.3		125.4	1007
66	121.9		79.2				135.15		201.3	111.3
66	275.6		232.65						69.3	164.3
70.95	190.8		62.7				119.25		59.4	135.15
56.1	254.4		70.95				151.05		480.15
	381.6		79.2				129.85		155.1	119.25
201.3			57.75				177.55		240.9	151.05
70.95	116.6		56.1				323.3		244.2	129.85
62.7	193.45		61.05				135.15		66	177.55
118.8	540.6		56.1				145.75		524.7	323.3
59.4	177.55						413.4		321.75	135.15
97.35	983.15		74.25				704.9		325.05	145.75
79.2	381.6		59.4				752.6		176.55	413.4
155.1	233.2		278.85				877.15		59.4	704.9
64.35	127.2		90.75				604.2		298.65	752.6
132	638.65		59.4				227.9		488.4	877.15
87.45	177.55		160.05				140.45		173.25	604.2
75.9	106		72.6			221.1	206.7		64.35	227.9
94.05	302.1		67.65			135.3	124.55		285.45	140.45
62.7	225.25		118.8			82.5	424		115.5	206.7
59.4	116.6		66			227.7	495.55		105.6	124.55
95.7	201.4		161.7			135.3	477		102.3	424
112.2	156.35		194.7			61.05	537.95		193.05	495.55
62.7	135.15		61.05			381.15	106		89.1	477
	106		56.1			100.65	227.9		445.5	537.95
108.9	516.75		61.05			161.7	349.8		72.6	106
84.15	151.05		97.35			108.9	156.35		67.65	227.9
117.15	153.7		80.85			318.45	455.8		105.6	349.8
75.9	347.15		84.15			235.95	151.05		145.2	156.35
178.2	954		77.55			293.7	288.85		219.45	455.8
77.55	532.65		64.35			557.7	151.05		330	151.05
56.1	246.45		90.75			97.35	190.8		74.25	288.85
66			161.7			227.7	408.1		84.15	151.05
70.95	251.75		141.9			123.75	455.8		90.75	190.8
90.75	121.9		85.8			158.4	217.3			408.1
112.2	951.35		189.75			394.35	212		143.55	455.8
99	108.65		66			67.65	132.5		206.25	217.3
75.9	143.1		166.65			366.3	188.15		184.8	212
56.1	378.95		62.7			79.2	280.9		77.55	132.5
57.75	848		61.05			268.95	808.25		239.25	188.15
80.85	106		107.25			84.15	302.1		209.55	280.9
72.6	355.1		57.75			84.15	103.35		70.95	808.25
57.75	368.35		87.45			169.95	190.8		194.7	302.1
183.15	222.6		66			278.85	272.95		70.95	103.35
400.95	516.75		89.1			140.25	304.75		239.25	190.8
56.1	424		59.4			201.3	132.5		181.5	272.95
125.4	180.2		75.9			244.2	458.45		87.45	304.75
64.35	824.15		80.85			193.05	135.15		227.7	132.5
273.9	691.65		79.2			265.65	217.3		112.2	458.45
74.25	251.75		85.8			160.05	209.35		135.3	135.15
72.6	156.35		61.05			110.55	243.8		64.35	217.3
56.1	106		240.9			410.85	212		143.55	209.35
130.35	397.5		117.15			84.15	190.8		102.3	243.8
141.9	137.8		82.5			123.75	177.55		99	212
122.1	156.35		231			64.35	137.8		216.15	190.8
64.35	174.9		57.75			156.75	140.45		217.8	177.55
62.7	630.7		136.95			310.2			308.55	137.8
97.35	219.95		77.55			94.05	108.65			140.45
82.5	363.05		136.95			143.55	689		204.6
94.05	331.25					123.75	333.9		199.65	108.65
64.35	135.15		59.4			61.05	103.35		102.3	689
202.95	294.15		235.95			181.5	294.15		348.15	333.9
56.1	227.9		156.75			300.3	225.25		209.55	103.35
84.15	193.45		75.9			207.9	153.7		179.85	294.15
183.15	418.7		70.95			161.7	490.25		468.6	225.25
70.95	177.55		95.7			226.05	214.65		191.4	153.7
67.65	190.8		70.95			90.75	333.9		87.45	490.25
	206.7		57.75			140.25	198.75		188.1	214.65
262.35	132.5		151.8			590.7	188.15		242.55	333.9
70.95			424.05			311.85	302.1		224.4	198.75
222.75	267.65		150.15			56.1	360.4		125.4	188.15
59.4	219.95		325.05			97.35	373.65		110.55	302.1
221.1	646.6		145.2			107.25	540.6		420.75	360.4
77.55	127.2		77.55			74.25	121.9		132	373.65
66	551.2		438.9			155.1	113.95		80.85	540.6
105.6	985.8		87.45			278.85	744.65		140.25	121.9
102.3	100.7		168.3			155.1	185.5		66	113.95
97.35	405.45		100.65			107.25	304.75		174.9	744.65
90.75	659.85		59.4			123.75	482.3		221.1	185.5
62.7	296.8		80.85			69.3	108.65		198	304.75
186.45	148.4		64.35			231	336.55		260.7	482.3
221.1	116.6		64.35			113.85	336.55		156.75	108.65
67.65	651.9		122.1			184.8	198.75		143.55	336.55
303.6			196.35				312.7		140.25	336.55
270.6	323.3		56.1			61.05	132.5		130.35	198.75
94.05	408.1		69.3			226.05	159		57.75	312.7
57.75	286.2		69.3			179.85	381.6		59.4	132.5
112.2	249.1		80.85			240.9	1014.95		242.55	159
153.45	355.1		59.4			448.8	182.85		315.15	381.6
475.2	174.9		70.95			163.35	662.5		264	1014.95
165	699.6		245.85			128.7	129.85		160.05	182.85
	100.7		56.1			465.3	469.05		239.25	662.5
80.85	196.1		115.5			140.25	349.8		206.25	129.85
99	246.45		247.5			125.4	148.4		171.6	469.05
82.5	1645.65		344.85			176.55	121.9		176.55	349.8
70.95	381.6		77.55			186.45	726.1		120.45	148.4
108.9	201.4		250.8			201.3	145.75		219.45	121.9
70.95	442.55		56.1			297	402.8		194.7	726.1
61.05	265		72.6			356.4	477		433.95	145.75
174.9	405.45		74.25			206.25	161.65		80.85	402.8
99	519.4		59.4			409.2	296.8		176.55	477
77.55	466.4		74.25			153.45	585.65		272.25	161.65
255.75	272.95		84.15			194.7	267.65		282.15	296.8
237.6	127.2		99			150.15	140.45		245.85	585.65
275.55	352.45		113.85			62.7	325.95		113.85	267.65
80.85	137.8		61.05			176.55	278.25		79.2	140.45
206.25	776.45		318.45			382.8	156.35		151.8	325.95
90.75	919.55		57.75			249.15	278.25		247.5	278.25
66	230.55		103.95			262.35	119.25		127.05	156.35
128.7	166.95		85.8			318.45	135.15		107.25	278.25
100.65	222.6		90.75			214.5	156.35		80.85	119.25
103.95	137.8		72.6			151.8			85.8	135.15
74.25	1195.15		75.9			163.35	243.8		61.05	156.35
90.75	360.4		69.3			107.25	153.7
57.75	272.95		57.75			249.15	569.75		254.1	243.8
64.35	219.95		69.3			280.5	1062.65		250.8	153.7
145.2	124.55		100.65			221.1	169.6		407.55	569.75
155.1	408.1		57.75			92.4	530		199.65	1062.65
82.5	424		70.95			204.6	723.45		103.95	169.6
112.2	291.5		82.5			146.85	991.1		414.15	530
188.1	797.65					221.1	169.6		125.4	723.45
136.95	254.4		79.2			333.3	132.5		326.7	991.1
117.15	336.55		69.3			143.55	159		90.75	169.6
90.75	304.75		290.4			262.35	212		148.5	132.5
75.9	341.85		255.75			226.05	548.55		62.7	159
125.4	241.15		179.85			285.45	193.45		369.6	212
166.65	259.7		95.7			64.35	365.7		165	548.55
146.85	177.55		189.75			113.85	116.6		125.4	193.45
85.8	397.5		57.75			130.35	241.15		448.8	365.7
77.55			145.2			201.3	129.85		107.25	116.6
429	127.2		103.95			227.7	461.1		394.35	241.15
146.85	416.05		89.1			117.15	108.65		402.6	129.85
92.4	111.3		539.55			186.45	106		146.85	461.1
117.15	437.25		85.8			310.2	304.75		87.45	108.65
95.7	206.7		66			301.95	389.55		150.15	106
95.7	299.45		56.1			120.45	241.15		130.35	304.75
84.15	127.2		97.35			132	339.2		110.55	389.55
178.2	323.3		64.35			127.05	310.05		361.35	241.15
94.05	132.5		61.05			99	360.4		145.2	339.2
100.65	320.65		92.4			80.85	418.7		75.9	310.05
79.2	241.15		74.25			292.05	233.2		193.05	360.4
92.4	352.45		173.25			94.05	312.7		112.2	418.7
207.9	153.7		61.05			99	254.4		125.4	233.2
87.45	212		132			194.7	667.8		64.35	312.7
59.4	363.05		85.8			277.2	482.3		62.7	254.4
250.8	169.6		69.3			103.95	111.3		420.75	667.8
158.4	636		56.1			92.4	543.25		127.05	482.3
97.35	418.7		67.65			94.05	161.65		179.85	111.3
448.8	121.9		56.1			359.7	127.2		369.6	543.25
155.1	182.85		57.75			135.3	193.45		158.4	161.65
174.9	665.15		70.95			110.55	111.3		209.55	127.2
123.75	100.7		77.55			145.2	394.85		377.85	193.45
82.5	214.65		138.6			244.2	196.1		255.75	111.3
112.2	214.65		117.15			234.3	227.9		166.65	394.85
64.35	689		89.1			74.25	267.65		455.4	196.1
117.15	384.25		128.7			90.75	691.65		107.25	227.9
70.95	270.3		318.45			89.1	288.85		344.85	267.65
110.55	164.3		112.2			115.5	132.5		79.2	691.65
214.5	405.45		77.55			66	124.55			288.85
242.55	201.4		61.05			64.35	447.85		100.65	132.5
108.9	304.75		118.8				458.45		161.7	124.55
72.6	325.95		97.35			278.85	185.5		117.15	447.85
136.95	201.4		191.4			209.55	310.05		110.55	458.45
113.85	230.55		77.55			141.9	156.35		179.85	185.5
	296.8		112.2			382.8	522.05		227.7	310.05
90.75	487.6		92.4			458.7	106		69.3	156.35
108.9	169.6		117.15			212.85	196.1		82.5	522.05
295.35	259.7					158.4	439.9		82.5	106
82.5	376.3					249.15	484.95		118.8	196.1
59.4	159					199.65	196.1		90.75	439.9
61.05	225.25					221.1	111.3		201.3	484.95
61.05	482.3		67.65			226.05	206.7		56.1	196.1
80.85	180.2		267.3			132	638.65		94.05	111.3
254.1	537.95		328.35			237.6	477		75.9	206.7
75.9	249.1		531.3			127.05	137.8		108.9	638.65
57.75	416.05		153.45			173.25	394.85		102.3	477
176.55	161.65		59.4			155.1	479.65		77.55	137.8
57.75	530		165			148.5	357.75		87.45	394.85
112.2	707.55		204.6			90.75	129.85		82.5	479.65
72.6	331.25		95.7			254.1	201.4		113.85	357.75
264	339.2		105.6			298.65			102.3	129.85
70.95	286.2		306.9			273.9	288.85		226.05	201.4
122.1			333.3			196.35	1820.55		92.4
90.75	246.45		141.9			206.25	484.95		110.55	288.85
56.1	376.3		252.45			94.05	193.45		77.55	1820.55
99	265		87.45			303.6	246.45		173.25	484.95
143.55	164.3		188.1			77.55	405.45		70.95	193.45
74.25	310.05		113.85			108.9	315.35		107.25	246.45
120.45	222.6		161.7			89.1	588.3		56.1	405.45
117.15	177.55		465.3			127.05	172.25		244.2	315.35
67.65	151.05		227.7			84.15	225.25		338.25	588.3
136.95	198.75		475.2			120.45	622.75		184.8	172.25
221.1	177.55		183.15			84.15	166.95		100.65	225.25
69.3	209.35		112.2			371.25	140.45		128.7	622.75
72.6	299.45		450.45			219.45	524.7		143.55	166.95
72.6	145.75		212.85			229.35	410.75		379.5	140.45
216.15	484.95		320.1			133.65	108.65		226.05	524.7
59.4	286.2		85.8			87.45	331.25		275.55	410.75
163.35	164.3		174.9			278.85	243.8		198	108.65
77.55	246.45		66			120.45	233.2		414.15	331.25
353.1	670.45		113.85			150.15	214.65		113.85	243.8
89.1	148.4		409.2			56.1	1110.35		66	233.2
99	204.05		288.75			231	487.6		150.15	214.65
75.9	765.85		250.8			282.15	363.05		231	1110.35
115.5	516.75		92.4			151.8	328.6		99	487.6
69.3	185.5		321.75			249.15	352.45		254.1	363.05
79.2	164.3		79.2			118.8	537.95		359.7	328.6
64.35	174.9		108.9			151.8	185.5		136.95	352.45
250.8	129.85		214.5			150.15	106		79.2	537.95
97.35			330			122.1	564.45		140.25	185.5
67.65	259.7		130.35			339.9	347.15		57.75	106
61.05	339.2		688.05			75.9	381.6		67.65	564.45
57.75	408.1		133.65			239.25	177.55		224.4	347.15
107.25	201.4		437.25			257.4	177.55		92.4	381.6
64.35	100.7		105.6			161.7	302.1		199.65	177.55
102.3	156.35		239.25			115.5	315.35		222.75	177.55
	148.4		293.7			270.6	442.55		89.1	302.1
66	233.2		146.85			150.15	469.05		217.8	315.35
94.05	280.9		107.25			207.9	431.95		102.3	442.55
103.95	121.9		127.05			156.75			80.85	469.05
252.45	675.75		130.35			485.1			135.3	431.95
89.1	455.8		166.65			122.1			216.15
277.2	503.5		186.45			206.25			82.5
127.05	437.25		234.3			196.35			79.2
80.85	106		145.2			214.5			268.95
118.8	151.05		150.15			427.35			66
85.8	961.95		108.9			120.45			364.65
82.5	116.6		59.4			113.85			186.45
57.75	180.2		70.95			168.3			87.45
80.85	116.6		330			400.95	553.85		75.9
107.25	111.3		260.7			186.45	410.75		74.25
64.35	185.5		107.25			120.45	100.7		254.1
85.8	113.95		143.55			57.75	410.75		255.75
181.5	1592.65		186.45			75.9	522.05		193.05
100.65	235.85		292.05			145.2	217.3		226.05	553.85
66	151.05		320.1			105.6	217.3		64.35	410.75
57.75	124.55		66			70.95	267.65		158.4	100.7
57.75	365.7		112.2				408.1		62.7	410.75
130.35	651.9		69.3			136.95	145.75		103.95	522.05
90.75	127.2		57.75			295.35	413.4		257.4	217.3
72.6	458.45		122.1			331.65	227.9		74.25	217.3
74.25	119.25		64.35			120.45	302.1		84.15	267.65
61.05						755.7	331.25		75.9	408.1
85.8	111.3		135.3			264	172.25			145.75
82.5	572.4		95.7			234.3	103.35			413.4
82.5	355.1		87.45			244.2	307.4			227.9
113.85	135.15		320.1			174.9	890.4		118.8	302.1
94.05	386.9		457.05			273.9	734.05		100.65	331.25
66	304.75		285.45			125.4	742		278.85	172.25
103.95	174.9		198			400.95	113.95		339.9	103.35
95.7	410.75		257.4			181.5	235.85		181.5	307.4
176.55	458.45		97.35			168.3	310.05		229.35	890.4
115.5	265		57.75			69.3	198.75		94.05	734.05
89.1	808.25		318.45			160.05	166.95		62.7	742
67.65	209.35		118.8			305.25	402.8		702.9	113.95
115.5	490.25		127.05			361.35	712.85		336.6	235.85
155.1	262.35		198			361.35	286.2		681.45	310.05
64.35	286.2		257.4			240.9	673.1		397.65	198.75
84.15	365.7		56.1			457.05	302.1		354.75	166.95
75.9	116.6		260.7			280.5	826.8		280.5	402.8
244.2	651.9		250.8			87.45	736.7		488.4	712.85
132	545.9		95.7			176.55	243.8		466.95	286.2
115.5	373.65		268.95			260.7	429.3		300.3	673.1
125.4	296.8		206.25			82.5	196.1		75.9	302.1
82.5	773.8		105.6			193.05	100.7		453.75	826.8
235.95	545.9		242.55			168.3	437.25		433.95	736.7
173.25	514.1		168.3			217.8			493.35	243.8
59.4	116.6		198			199.65	357.75		344.85	429.3
94.05	551.2		242.55			151.8	315.35		412.5	196.1
186.45	940.75		275.55			207.9	1060		349.8	100.7
146.85	177.55		273.9			110.55	246.45		273.9	437.25
61.05	320.65		57.75			333.3	474.35		551.1
66			148.5			196.35	1375.35		136.95	357.75
			94.05			161.7	394.85		351.45	315.35
			140.25			300.3	855.95		278.85	1060
			132			72.6	498.2		1254	246.45
			204.6			143.55	1073.25		597.3	474.35
171.6			79.2			366.3	140.45		214.5	1375.35
145.2			148.5			252.45	180.2		384.45	394.85
161.7			135.3			277.2	901		361.35	855.95
249.15			570.9			221.1	304.75		529.65	498.2
199.65			80.85			249.15	140.45		77.55	1073.25
206.25			359.7			229.35	318		231	140.45
257.4			336.6			216.15	278.25		396	180.2
455.4			242.55			61.05	119.25		84.15	901
214.5			107.25			136.95	426.65		181.5	304.75
165			369.6			318.45	469.05		468.6	140.45
255.75			85.8			74.25	564.45		311.85	318
437.25			297			128.7	119.25		138.6	278.25
75.9			387.75			165	265		80.85	119.25
300.3			217.8			120.45	429.3		478.5	426.65
219.45			453.75			257.4	315.35		79.2	469.05
193.05			105.6			443.85			532.95	564.45
117.15			244.2			214.5	845.35		948.75	119.25
235.95			120.45			320.1	135.15		562.65	265
108.9			244.2			252.45	341.85		615.45	429.3
122.1			234.3			158.4	124.55		499.95	315.35
94.05			155.1			358.05	204.05		605.55
145.2			165			242.55	508.8		166.65	845.35
427.35			153.45			158.4	291.5		196.35	135.15
212.85			473.55			407.55	291.5		417.45	341.85
343.2			443.85			70.95	143.1		72.6	124.55
160.05			99			158.4	294.15		427.35	204.05
186.45			64.35			204.6	728.75		59.4	508.8
57.75			198			97.35	286.2		518.1	291.5
107.25			326.7			108.9	225.25		282.15	291.5
140.25			151.8				188.15		306.9	143.1
298.65			115.5			156.75	233.2		70.95	294.15
532.95						72.6	304.75		364.65	728.75
74.25			133.65			61.05	302.1		872.85	286.2
151.8			148.5			145.2	145.75		580.8	225.25
87.45			95.7			67.65	333.9		495	188.15
120.45			151.8			57.75	376.3		572.55	233.2
580.8			250.8			118.8	442.55		135.3	304.75
153.45			150.15			79.2	384.25		171.6	302.1
326.7			199.65			123.75	212		308.55	145.75
127.05			70.95			99	265		376.2	333.9
57.75			120.45			87.45	304.75		506.55	376.3
178.2			212.85			133.65	135.15		300.3	442.55
108.9			69.3			87.45	156.35		402.6	384.25
127.05			118.8			165	1144.8		87.45	212
89.1			127.05			56.1	400.15		204.6	265
168.3			56.1			56.1	437.25		295.35	304.75
273.9			132			122.1	450.5		516.45	135.15
62.7			156.75			102.3	219.95		575.85	156.35
95.7			165			120.45	145.75		861.3	1144.8
61.05			122.1			75.9	272.95		435.6	400.15
115.5			89.1			115.5	378.95		69.3	437.25
92.4			118.8			59.4	135.15		57.75	450.5
103.95			153.45			128.7	145.75		194.7	219.95
97.35			82.5			79.2	336.55		516.45	145.75
113.85			77.55			56.1			339.9	272.95
74.25			169.95			77.55	272.95		270.6	378.95
160.05			84.15			118.8	145.75			135.15
135.3			113.85			155.1	389.55		179.85	145.75
160.05			188.1			138.6	219.95		56.1	336.55
122.1			89.1			77.55	376.3		316.8
240.9			79.2			179.85	100.7		118.8	272.95
178.2			84.15			136.95	649.25		160.05	145.75
122.1			103.95			330	159		148.5	389.55
245.85			143.55			318.45	235.85		181.5	219.95
90.75			105.6			254.1	972.55		544.5	376.3
62.7			72.6			112.2	628.05		1580.7	100.7
67.65			97.35			272.25	151.05		330	649.25
			107.25			145.2	670.45		79.2	159
290.4			123.75			351.45	426.65		69.3	235.85
125.4			122.1			105.6	312.7		384.45	972.55
80.85			56.1			183.15	1152.75		229.35	628.05
229.35			66			460.35	169.6		240.9	151.05
231			70.95			120.45	286.2		580.8	670.45
61.05			155.1			447.15	219.95		425.7	426.65
369.6			84.15			288.75	506.15		483.45	312.7
62.7			156.75			231	455.8		427.35	1152.75
113.85			89.1			211.2	643.95		301.95	169.6
97.35			193.05			146.85	349.8		1128.6	286.2
77.55			161.7			146.85			452.1	219.95
118.8			364.65			61.05	299.45		292.05	506.15
196.35			202.95			193.05	127.2		264	455.8
249.15			117.15			138.6	148.4		270.6	643.95
66			70.95			339.9	267.65		120.45	349.8
99			186.45			267.3	924.85		343.2
80.85			108.9			239.25	484.95		1519.65	299.45
189.75			62.7			151.8	458.45		156.75	127.2
250.8			113.85			400.95	556.5		201.3	148.4
250.8			117.15			252.45	188.15		171.6	267.65
176.55			80.85			462	143.1		235.95	924.85
89.1			59.4			74.25	198.75		280.5	484.95
189.75			443.85			85.8	426.65		64.35	458.45
160.05			80.85			221.1	437.25		412.5	556.5
178.2			113.85			320.1	503.5		275.55	188.15
384.45			84.15			356.4	103.35		255.75	143.1
77.55			80.85			202.95	166.95		161.7	198.75
259.05			117.15			163.35	188.15		427.35	426.65
148.5			72.6			229.35	1020.25		94.05	437.25
92.4						201.3	320.65		356.4	503.5
132			118.8			216.15	405.45		179.85	103.35
59.4			156.75			148.5	148.4		1427.25	166.95
57.75			155.1			178.2	249.1		254.1	188.15
108.9			356.4			288.75	233.2		168.3	1020.25
160.05			315.15			198	341.85		422.4	320.65
56.1			128.7				267.65		313.5	405.45
138.6			229.35			356.4	482.3		400.95	148.4
339.9			75.9			166.65	294.15		308.55	249.1
113.85			108.9			97.35	296.8		217.8	233.2
150.15			118.8			82.5	569.75		272.25	341.85
82.5			173.25			397.65	174.9		990	267.65
153.45			135.3			293.7	145.75		64.35	482.3
198			113.85			59.4	747.3		74.25	294.15
67.65			171.6			92.4	288.85		123.75	296.8
80.85			79.2			92.4	246.45		198	569.75
57.75			141.9			174.9	294.15		117.15	174.9
132			264			288.75			270.6	145.75
[truncated: 2,051 more rows]

## Sheet: Fig2F
size (um2)	velocity (um/min)
840.762	0.00878943
827.086	0.0116773
828.389	0.0207873
838.809	0.0221279
845.321	0.0131464
870.72	0.0238632
860.951	0.00899923
873.976	0.0135799
874.627	0.00343524
869.417	0.0206539
880.489	0.00925713
925.425	0.0164926
905.236	0.0153253
938.45	0.0176095
909.795	0.0228931
492.344	0.0874975
481.273	0.08553
457.828	0.115025
449.362	0.0962229
393.354	0.139715
457.177	0.127184
500.81	0.102495
511.882	0.0803114
556.818	0.0578293
604.359	0.0295949
649.947	0.00162726
672.089	0.0396693
693.58	0.0490675
722.886	0.0350197
733.306	0.0319354
243.567	0.0689928
239.008	0.0809736
243.567	0.0461803
198.631	0.031384
213.61	0.0141512
268.315	0.0691085
287.852	0.0754398
306.087	0.0328453
329.532	0.027441
309.343	0.0877737
298.272	0.152179
319.763	0.122277
332.788	0.054997
359.489	0.0718591
384.237	0.0452488
267.012	0.186946
220.773	0.214111
212.307	0.165014
188.211	0.0858439
181.047	0.0716013
203.19	0.126448
186.257	0.0657618
204.492	0.0276065
231.845	0.110051
223.378	0.121364
227.286	0.0206862
227.937	0.0736269
255.941	0.0598102
248.777	0.0766063
238.357	0.0669149
276.13	0.240205
240.311	0.161032
259.848	0.194865
283.293	0.117761
297.621	0.0716737
341.254	0.0810319
349.721	0.0962664
360.141	0.0617013
396.611	0.0687653
361.443	0.177688
378.376	0.0814503
400.518	0.0645971
364.699	0.0281241
352.977	0.150648
339.301	0.0689829
319.763
319.112	0.0107943
308.041	0.0241146
317.158	0.0800917
315.856	0.0548735
291.108	0.171112
298.272	0.234887
302.18	0.162975
308.692	0.174961
259.197	0.0967204
318.461	0.103247
349.069	0.118479
353.628	0.146491
384.888	0.0942642
363.397	0.0714046
398.564	0.122111
394.657	0.083576
414.194	0.0628405
410.287	0.0703688
416.799	0.0621975
427.219	0.062752
424.614	0.0402037
437.639	0.0126583
433.081	0.042769
425.266	0.0575968
164.766	0.0220763
172.581	0.037754
183.001	0.0318807
191.467	0.0102049
200.585	0.0234935
209.702	0.0164316
210.353	0.0352767
214.261	0.00805571
220.773	0.0436698
232.496	0.0249216
231.845	0.0235647
225.983	0.0223741
229.891	0.0170632
229.891	0.0361076
228.588	0.0158695
482.576	0.0374998
494.949	0.023979
488.437	0.0275292
507.323	0.0381819
539.885	0.0255791
507.323	0.0176162
522.953	0.0200426
526.86	0.0353338
501.462	0.017986
507.323	0.0116525
515.138	0.0129476
509.928	0.0036664
520.348	0.0279409
512.533	0.029879
514.487	0.0160989
304.133	0.0268061
307.39	0.0371239
321.717	0.028196
328.229	0.0173177
319.763	0.00745723
357.536	0.0413526
352.977	0.0231558
343.208	0.0235048
364.048	0.0183106
378.376	0.0149824
378.376	0.0152162
373.817	0.00716999
376.422	0.0291257
395.308	0.0384012
399.216	0.0138327
209.702	0.0111244
215.563	0.0403242
217.517	0.017886
223.378	0.0212636
211.656	0.0209348
222.727	0.0158713
239.66	0.0393765
231.845	0.0219921
247.475	0.00588921
261.802	0.00880615
258.546	0.0173288
259.197	0.00294672
273.525	0.0133373
265.71	0.0246982
274.827	0.0207878
240.311	0.0253331
242.916	0.0220653
239.66	0.0365902
244.218	0.0279817
250.731	0.0406196
257.243	0.0113264
270.92	0.0473787
260.5	0.0344432
281.991	0.0331314
293.062	0.029797
287.852	0.0160574
306.738	0.0457277
261.151	0.0198507
1610.54	0.0148767
1603.38	0.0217622
1609.89	0.0163881
1607.93	0.0139885
1603.38	0.0104431
1614.45	0.0204929
1564.95	0.00980655
1570.81	0.0264876
1568.21	0.00655488
1581.23	0.0159438
1576.67	0.0241698
1572.12	0.015145
1555.18	0.0175179
1585.79	0.0116364
1583.19	0.0178068
651.9	0.104766
634.968	0.114487
649.295	0.0314503
692.929	0.0457088
737.214	0.0528042
797.78	0.0913192
789.314	0.089811
816.015	0.0835385
817.969	0.0508721
855.09	0.0405669
883.745	0.0926191
869.417	0.0695811
825.784	0.111048
817.969	0.0831348
812.759	0.0725245
269.617	0.187891
245.521	0.17174
234.45	0.0671888
222.076	0.0801397
219.471	0.101844
247.475	0.0909082
271.571	0.160114
273.525	0.162056
270.268	0.106622
277.432	0.117191
263.105	0.0674144
257.895	0.13197
300.226	0.135863
293.062	0.177299
235.101	0.0598599
956.685	0.0612384
1041.35	0.103967
1077.82	0.0290623
1116.24	0.046043
1151.41	0.0358547
1164.43	0.0123025
1212.63	0.0240314
1172.9	0.028503
1185.92	0.0343759
1206.76	0.0107758
1187.23	0.0187832
1146.85	0.00737164
1195.04	0.0121648
1211.32	0.0118713
1241.93	0.03381
298.923	0.253853
290.457	0.313426
302.18	0.213319
267.012	0.203807
250.08	0.121186
237.706	0.0629071
248.126	0.020363
259.848	0.0541278
259.197	0.0540003
266.361	0.145026
286.55	0.161322
284.596	0.1905
267.663	0.184456
274.176	0.148686
291.108	0.156584
225.332	0.127969
259.848	0.196763
268.315	0.161231
243.567	0.16095
218.82	0.141522
197.98	0.105654
186.908	0.109524
212.307	0.073014
229.24	0.118243
280.037	0.0613673
328.229	0.0250084
321.717	0.10753
330.183	0.0540346
396.611	0.0339356
440.244	0.0174227
218.168	0.227425
237.055	0.313075
241.613	0.238015
195.375	0.199679
186.908	0.172767
197.328	0.0221897
237.055	0.0850284
240.311	0.16493
283.293	0.0686597
268.315	0.0432742
280.688	0.134624
253.987	0.0862442
252.685	0.0660919
269.617	0.0306128
259.848	0.012088
260.5	0.139784
257.243	0.128242
263.105	0.0606102
244.87	0.0823
237.706	0.0218765
249.428	0.106235
249.428	0.138687
273.525	0.149861
317.81	0.0985595
337.998	0.1398
291.108	0.104834
268.315	0.0878624
265.058	0.0133364
293.713	0.00970734
315.856	0.0418904
799.734	0.0887306
806.898	0.0251589
836.855	0.0157899
851.834	0.0412666
847.926	0.0439194
845.321	0.0126076
865.51	0.00316097
860.3	0.0743255
862.254	0.020526
931.286	0.0108015
974.269	0.060128
926.076	0.00964614
957.987	0.021143
1016.6	0.0826146
989.247	0.0354866
1447.08	0.0664809
1416.47	0.0252988
1460.1	0.044186
1362.41	0.0443182
1363.06	0.0203435
1391.07	0.0125221
1406.7	0.0105716
1404.09	0.0208461
1424.28	0.0076063
1422.98	0.018513
1465.96	0.0168083
1472.47	0.0207541
1492.01	0.0142934
1504.39	0.0280402
1510.25	0.00600027
216.215	0.169904
223.378	0.169653
220.773	0.209987
192.118	0.264861
235.101	0.256495
326.276	0.299387
337.998	0.246918
319.112	0.307772
304.133	0.299736
325.625	0.215518
341.254	0.198474
372.514	0.137426
462.387	0.152243
517.743	0.245228
459.131	0.141585
1111.03	0.0217577
1128.61	0.0244919
1081.72	0.0146786
1090.84	0.0194066
1071.96	0.0217833
1078.47	0.0210982
1084.33	0.00980557
1081.07	0.0218625
1097.35	0.0201971
1071.3	0.00787034
1101.91	0.0164931
1093.45	0.0306371
1094.1	0.0139245
1117.54	0.00818627
1112.33	0.0271663
1034.18	0.0106037
1031.58	0.0141589
1042.65	0.01066
1047.21	0.0222354
1050.46	0.0222767
1065.44	0.0245772
1043.95	0.0159311
1036.14	0.0145384
995.76	0.0312596
932.589	0.0189579
936.496	0.0209488
937.147	0.0275687
913.702	0.00554424
922.169	0.0195424
889.606	0.0174474
1213.28	0.0167802
1147.5	0.0365301
1178.11	0.0208708
1121.45	0.0046173
1200.9	0.0188923
1165.74	0.03377
1213.28	0.0346381
1227.6	0.0203015
1211.32	0.00431391
1180.06	0.0114625
1205.46	0.0200657
1190.48	0.0253873
1126.01	0.0476935
1197	0.0331732
1156.62	0.032156
249.428	0.0691021
276.781	0.0516037
282.642	0.0557868
279.386	0.120652
256.592	0.142169
270.92	0.138362
287.201	0.098986
305.436	0.0968728
362.746	0.103257
352.326	0.122953
374.468	0.122152
397.913	0.164164
439.593	0.083192
529.465	0.0531405
553.562	0.11891
745.029	0.0235611
698.79	0.0329716
774.986	0.0571341
791.919	0.0499362
782.801	0.0387234
772.381	0.0752636
751.541	0.0356978
745.68	0.121042
776.289	0.0758546
779.545	0.0310863
818.62	0.0375774
834.901	0.00237971
896.119	0.0411809
880.489	0.0338277
953.429	0.0544163
783.453	0.0049251
773.684	0.0181053
793.221	0.00611721
779.545	0.0164989
757.403	0.0251651
778.243	0.00911243
783.453	0.03413
784.104	0.0289122
797.78	0.00248383
809.503	0.0157659
806.246	0.0207901
811.456	0.0288329
814.061	0.0110016
798.431	0.0252102
798.431	0.04139
615.43	0.0772133
580.263	0.0687372
560.074	0.0238485
579.612	0.0586206
608.267	0.0912996
584.17	0.0585685
553.562	0.0817845
537.932	0.086911
513.184	0.0827432
506.02	0.0562753
554.213	0.0517561
585.473	0.0921015
592.637	0.0403941
640.178	0.0337786
660.366	0.0460158
215.563	0.0903495
216.215	0.0760709
227.286	0.0593045
239.66	0.0837
253.987	0.124118
295.016	0.0849
311.948	0.12311
300.877	0.120003
328.881	0.049265
332.788	0.070576
332.137	0.0740016
369.258	0.0755229
379.678	0.0553477
394.657	0.0885335
351.023	0.23596
460.433	0.0315154
453.269	0.087547
460.433	0.0429239
465.643	0.102413
489.088	0.123618
491.042	0.0534477
541.839	0.0841287
588.078	0.06085
597.847	0.032105
604.359	0.0093028
604.359	0.0125515
649.947	0.0687226
709.861	0.0780023
741.773	0.045724
717.676	0.0426525
797.78	0.0244877
829.691	0.0220324
855.741	0.0301586
849.229	0.031778
849.88	0.0136328
838.157	0.00667021
877.232	0.020655
794.524	0.0288324
269.617	0.355179
258.546	0.21834
277.432	0.277344
234.45	0.205479
251.382	0.323301
233.147	0.274868
231.845	0.253263
266.361	0.208389
272.222	0.0752989
293.062	0.00683137
322.368	0.0953452
333.439	0.113092
359.489	0.0968086
349.069	0.107487
293.713	0.0966944
227.937	0.335423
231.193	0.198306
235.752	0.225235
229.24	0.228834
237.706	0.278771
253.336	0.279929
295.667	0.242713
281.991	0.162222
252.033	0.111034
225.983	0.0544233
225.332	0.161631
248.126	0.150008
295.016	0.429661
297.621	0.420592
254.638	0.125612
241.613	0.200344
212.958	0.126795
217.517	0.107621
224.03	0.203465
229.24	0.127415
221.425	0.089087
216.215	0.228102
205.795	0.0774953
243.567	0.0519809
248.126	0.0568124
257.243	0.0141876
500.81	0.095181
461.736	0.0936655
442.198	0.0744065
371.863	0.0790818
356.884	0.101116
341.254	0.0975198
424.614	0.12153
404.426	0.0335622
408.984	0.0419813
462.387	0.0170951
510.579	0.0463429
483.878	0.0669951
478.668	0.0157
470.853	0.0445986
463.689	0.0262674
863.556	0.00804203
865.51	0.0224391
904.585	0.00572835
900.026	0.0267553
915.005	0.0216784
935.194	0.004074
926.727	0.0120566
924.774	0.0154884
909.144	0.00896715
931.937	0.0233843
923.471	0.0141649
937.147	0.0282345
952.126	0.0302742
924.774	0.0372017
932.589	0.0258176
465.643	0.059874
483.227	0.0869501
518.394	0.0378955
541.839	0.0586787
539.885	0.0914172
539.234	0.0136603
552.259	0.0325172
575.704	0.0698762
590.032	0.0595457
587.427	0.0710236
597.195	0.0851978
644.085	0.0717075
672.74	0.0802174
625.199	0.147734
626.502	0.0941287
857.695	0.0574274
814.712	0.0224671
870.72	0.0638972
916.959	0.0115754
925.425	0.0135944
965.802	0.0125592
991.852	0.0171479
980.13	0.0161086
975.571	0.0158881
980.13	0.0145085
985.34	0.0278686
1004.88	0.0135316
1020.51	0.0239652
1023.11	0.0153656
1043.3	0.0198033
345.813	0.373249
309.343	0.354111
278.735	0.229167
291.76	0.235648
286.55	0.205595
306.738	0.253695
252.033	0.174004
256.592	0.21657
250.08	0.0977107
220.122	0.235961
292.411	0.0949219
274.827	0.111104
387.493	0.365556
332.137	0.371786
309.343	0.341448
301.528	0.257078
279.386	0.260252
293.713	0.183243
298.923	0.233357
287.201	0.221936
267.663	0.241368
308.692	0.174716
306.738	0.0931191
349.069	0.183624
337.998	0.145894
329.532	0.0590422
379.027	0.178813
370.561	0.0457383
369.258	0.0335076
402.472	0.0638824
426.568	0.108257
449.362	0.129814
475.412	0.12098
503.415	0.166804
461.736	0.152345
498.857	0.160311
457.177	0.119049
507.974	0.154643
532.722	0.128315
547.7	0.105278
1031.58	0.0144742
1037.44	0.025317
1027.67	0.0302101
1013.99	0.00582507
1018.55	0.01618
1015.3	0.00786322
997.062	0.0168421
989.898	0.0132481
999.667	0.0080865
1187.23	0.0486439
1197	0.00999616
1195.69	0.00463111
1187.88	0.0196468
1223.7	0.0352869
1248.44	0.0093522
1251.05	0.0153809
1247.79	0.0178258
1273.19	0.010202
1365.02	0.0180087
1286.87	0.0187667
1299.24	0.0197512
1331.8	0.00841662
1342.88	0.00980014
1353.3	0.021811
219.471	0.194015
227.937	0.206809
259.197	0.179889
259.848	0.238138
245.521	0.306972
227.286	0.255232
235.752	0.289507
220.122	0.269209
262.453	0.277157
242.265	0.148884
240.311	0.427814
231.193	0.5183
265.058	0.321648
281.34	0.180206
281.991	0.188049
207.748	0.28329
217.517	0.273109
208.4	0.228031
189.513	0.181441
216.215	0.158079
269.617	0.272319
250.08	0.310009
188.211	0.146283
161.51	0.130614
205.795	0.14746
201.887	0.289849
219.471	0.00217094
270.268	0.145027
272.873	0.121202
275.478	0.132668
369.909	0.0391158
368.607	0.161521
394.657	0.0280211
328.881	0.15658
376.422	0.173726
402.472	0.135027
389.447	0.0490749
427.871	0.107102
390.749	0.119432
337.998	0.158573
333.439	0.114705
360.792	0.0383153
409.636	0.148274
402.472	0.0675418
408.984	0.0721102
154.997	0.0188826
162.812	0.0455982
154.997	0.0150807
160.207	0.0243257
149.787	0.0263374
158.254	0.0256425
147.182	0.0302476
154.346	0.00692488
168.022	0.0367906
174.535	0.0165363
171.93	0.0298729
175.186	0.0326753
166.72	0.0147392
177.791	0.00740064
183.001	0.0975541
139.367	0.008668
144.577	0.017185
151.741	0.0391109
169.976	0.0464533
166.068	0.020622
180.396	0.0273697
188.862	0.00962814
184.303	0.0182947
177.791	0.00337531
169.325	0.0166858
179.093	0.0195352
184.955	0.02127
173.883	0.011823
179.745	0.0274525
168.673	0.0115223
420.056	0.00390933
413.543	0.00641431
419.404	0.0161413
414.846	0.0266824
417.451	0.020407
422.661	0.0169674
433.081	0.0146518
432.429	0.00538379
432.429	0.00627301
424.614	0.012775
425.917	0.0158735
405.077	0.0190956
209.051	0.0144342
193.421	0.0282691
200.585	0.0110255
204.492	0.0336465
199.933	0.0274966
188.862	0.0379619
208.4	0.0241295
209.702	0.0229087
211.656	0.0278995
211.005	0.0589404
210.353	0.0232581
203.841	0.0580795
200.585	0.0343787
190.165	0.0368696
191.467	0.0432643
171.93	0.0039358
173.883	0.00653601
186.908	0.00845974
183.001	0.0386568
188.862	0.0199146
182.35	0.0124147
199.282	0.0161911
166.068	0.0366377
205.795	0.0561398
203.19	0.0286005
211.005	0.0186415
227.937	0.0654317
206.446	0.0211923
204.492	0.0122538
207.748	0.0362726
1025.72	0.00664029
1043.3	0.00711151
1023.11	0.0103282
1010.09	0.0275073
1014.65	0.0192887
1043.95	0.0109082
1027.02	0.00783046
1016.6	0.00494515
1079.77	0.0229737
1034.83	0.0243556
1042.65	0.0264897
1064.14	0.0181991
1049.16	0.0136884
1040.7	0.0128564
1051.12	0.0348541
149.136	0.0203866
151.741	0.0131408
160.859	0.0180579
152.392	0.0325493
144.577	0.0391336
154.997	0.0112421
160.859	0.0575076
169.976	0.0542356
162.812	0.0111475
159.556	0.0171586
156.3	0.0198122
166.72	0.0255911
176.488	0.0147702
177.14	0.0214588
168.022	0.0200379
151.741	0.00714532
147.834	0.0158013
158.905	0.0254808
156.951	0.0264148
159.556	0.0227492
149.136	0.0247992
160.207	0.00742939
156.951	0.0220727
149.136	0.00794326
163.463	0.0312366
164.115	0.00818742
161.51	0.0147965
166.72	0.0113489
171.278	0.0206757
168.673	0.0168765
135.46	0.0282264
121.132	0.0604838
126.342	0.0266819
123.737	0.0171099
131.552	0.0242046
129.599	0.0260488
127.645	0.0157422
123.086	0.0199535
128.296	0.0219803
128.296	0.0172778
142.624	0.0143269
138.065	0.0417921
141.972	0.0156494
148.485	0.0195131
154.997	0.025469
197.328	0.0237689
188.862	0.0534747
200.585	0.0967859
242.265	0.123046
242.916	0.185517
267.012	0.186554
240.311	0.139679
210.353	0.128992
194.072	0.153268
191.467	0.122688
199.933	0.159307
173.232	0.161945
163.463	0.126034
175.837	0.113154
193.421	0.101011
205.143	0.157447
221.425	0.128413
242.916	0.109877
257.895	0.0927119
274.827	0.115276
281.34	0.127337
320.415	0.182641
280.688	0.163846
216.866	0.047818
200.585	0.148196
198.631	0.152482
188.211	0.161012
214.912	0.206709
239.66	0.151822
233.147	0.109497
254.638	0.334583
270.268	0.335768
265.71	0.369897
285.247	0.181136
298.272	0.164093
300.226	0.10078
342.557	0.103995
344.511	0.0494717
544.444	0.0263824
650.598	0.0606908
594.59	0.0480677
619.989	0.0611856
588.729	0.00362448
653.854	0.045759
625.199	0.0361637
695.534	0.0836602
700.093	0.0328026
741.121	0.0638894
721.584	0.0275116
780.848	0.0234932
828.389	0.0596291
801.688	0.0566265
795.826	0.00934792
1133.82	0.00424409
1099.96	0.00614919
1137.08	0.0150874
1115.59	0.0157303
1116.89	0.00210413
1148.8	0.00767665
1121.45	0.0163909
1129.27	0.00295478
1129.27	0.0110972
1146.2	0.0131373
1155.32	0.0245592
1165.08	0.0249354
1165.74	0.0243933
1169.64	0.0111564
1167.69	0.00118757
1084.98	0.00272597
1078.47	0.00899345
1090.19	0.0116665
1067.4	0.00799569
1064.14	0.0065207
1062.19	0.0102606
1062.19	0.0153871
1070.65	0.00367909
1067.4	0.010942
1077.17	0.0146326
1076.51	0.0215529
1073.91	0.0222001
1086.28	0.0177722
1088.24	0.00825265
1085.63	0.0177365
1052.42	0.0154382
1024.41	0.0140754
1040.7	0.0115899
1010.09	0.0181315
1022.46	0.0062283
1036.14	0.0032706
1024.41	0.0130157
1064.79	0.010425
1062.84	0.0262663
1044.6	0.00550783
1093.45	0.0125212
1083.03	0.0472753
1122.1	0.0353429
1126.66	0.0138168
1127.96	0.0191873
1352.64	0.0057027
1349.39	0.00716087
1343.53	0.0188
1327.25	0.00649506
1331.15	0.00740121
1318.78	0.00806565
1330.5	0.00965415
1326.59	0.00517815
1333.76	0.0147095
1331.15	0.00303891
1340.27	0.0196483
1344.18	0.0240681
1352.64	0.0259683
1346.78	0.0101833
1358.51	0.0125638
343.859	0.0608775
331.486	0.0746193
293.062	0.0743377
280.037	0.0656407
302.831	0.0610487
336.696	0.120962
351.674	0.0535321
450.664	0.0892113
517.743	0.100681
560.725	0.056394
583.519	0.0277061
609.569	0.0505695
646.69	0.10211
617.384	0.0469316
595.242	0.0146622
438.291	0.0732703
447.408	0.0628925
466.294	0.143003
494.298	0.124123
492.995	0.110169
528.163	0.109483
559.423	0.0929036
596.544	0.18515
647.342	0.158023
686.416	0.137875
720.281	0.12231
690.324	0.123719
696.185	0.102924
749.588	0.0626393
799.083	0.040219
301.528	0.149839
281.34	0.121748
322.368	0.180896
351.023	0.164167
348.418	0.177139
347.767	0.22635
334.742	0.184047
321.066	0.140044
325.625	0.175375
306.087	0.108602
339.301	0.113534
298.923	0.111655
317.158	0.0330002
339.301	0.0722495
330.834	0.00715617
571.145	0.0185757
575.704	0.0205834
638.224	0.0442934
606.313	0.00878942
621.943	0.00554271
615.43	0.0225568
647.342	0.017726
652.551	0.0192653
654.505	0.0163152
643.434	0.0169806
645.388	0.0151449
653.203	0.0141788
650.598	0.0135772
644.737	0.00382786
647.993	0.0130027
408.333	0.156942
441.547	0.0989813
435.686	0.0948088
410.938	0.114228
416.148	0.200795
442.849	0.14326
423.312	0.0749967
423.963	0.121964
412.241	0.136232
486.483	0.0968116
527.512	0.116146
539.234	0.143499
185.606	0.0500942
173.232	0.122007
201.236	0.208688
203.841	0.0855858
191.467	0.111108
192.118	0.124023
208.4	0.125018
224.03	0.21924
219.471	0.109229
225.983	0.0774016
228.588	0.0559954
224.681	0.0952074
239.66	0.0815124
266.361	0.0992954
311.948	0.365895
842.065	0.0119329
868.115	0.0288131
905.887	0.0384585
881.14	0.0179567
954.08	0.031703
953.429	0.00774403
928.03	0.0210735
921.517	0.00918452
929.984	0.0268913
944.962	0.0245184
944.962	0.0281793
977.525	0.00838123
980.13	0.0144387
982.735	0.00644211
961.895	0.012132
532.07	0.0684383
534.024	0.069541
535.978	0.101755
520.348	0.0630249
510.579	0.061469
507.323	0.0394678
545.747	0.053989
576.355	0.0632053
606.313	0.055725
590.683	0.0415965
595.242	0.0561435
595.242	0.00906435
591.334	0.014664
601.103	0.00946812
585.473	0.0116597
487.786	0.116359
528.814	0.0899863
539.234	0.10897
472.807	0.0980526
478.017	0.112725
549.003	0.0661168
549.654	0.114369
584.17	0.0948205
631.06	0.12072
674.694	0.0917838
654.505	0.0960997
636.27	0.0775302
629.758	0.137985
653.854	0.102665
659.715	0.0984501
364.699	0.140801
369.258	0.166686
425.917	0.0599957
435.034	0.0338701
471.504	0.0813325
506.672	0.0217977
536.629	0.0610574
523.604	0.0264169
512.533	0.0123572
554.213	0.0670368
580.914	0.0161003
599.8	0.00803241
566.587	0.070666
557.469	0.119202
565.284	0.0787828
957.336	0.00867979
911.749	0.0111567
935.194	0.0313412
924.774	0.0263291
974.269	0.0174824
989.898	0.0362369
981.432	0.0331347
984.688	0.0251875
959.29	0.0198863
963.849	0.0250084
978.176	0.0196964
970.361	0.0178549
963.849	0.0170521
964.5	0.00893451
977.525	0.0210152
989.247	0.00760311
169.325	0.0997519
173.883	0.0968372
177.791	0.104206
183.001	0.0435678
181.047	0.0258431
181.698	0.0556306
188.211	0.0363515
199.933	0.0567596
227.286	0.0819818
227.286	0.0397466
222.727	0.0582283
236.403	0.0561154
248.777	0.0834475
245.521	0.0564582
256.592	0.0376813
270.268	0.0250901
230.542	0.0230466
211.656	0.0329999
223.378	0.0726467
220.773	0.0591432
213.61	0.0217833
204.492	0.0308285
203.841	0.0619139
218.168	0.0106228
224.03	0.0651889
234.45	0.035199
240.962	0.00836675
247.475	0.0235816
261.802	0.0415477
289.155	0.0416772
294.365	0.0239481
278.083	0.0101908
309.995	0.0543881
323.671	0.0779968
326.276	0.0472379
333.439	0.0283308
364.699	0.0457869
399.216	0.0762961
396.611	0.019769
403.123	0.0531808
416.799	0.0262568
426.568	0.00491678
427.219	0.0255829
419.404	0.0310347
411.589	0.00549437
403.123	0.00482788
399.867	0.0230349
405.077	0.0161664
283.293	0.132418
331.486	0.168572
311.948	0.222371
286.55	0.30788
305.436	0.202171
327.578	0.145208
379.027	0.204945
455.874	0.292152
460.433	0.137051
479.971	0.14746
444.803	0.188432
426.568	0.237294
395.959	0.126409
457.828	0.192212
508.625	0.124854
537.28	0.0857576
968.407	0.00977681
950.172	0.00666742
966.454	0.00717932
967.756	0.0175593
980.13	0.0171087
980.13	0.0144013
992.503	0.00419306
983.386	0.030717
987.293	0.0151987
991.852	0.021339
992.503	0.0150496
988.596	0.0157619
989.898	0.016232
989.247	0.0154457
997.713	0.0143138
1002.27	0.0164785
298.923	0.133897
268.315	0.112108
331.486	0.123308
375.119	0.0962947
438.942	0.0638787
471.504	0.0891433
461.736	0.0648841
435.686	0.074626
423.963	0.154728
451.316	0.163482
524.255	0.097978
502.113	0.132445
450.664	0.223795
466.294	0.0993995
500.81	0.071786
527.512	0.0536913
441.547	0.140086
450.013	0.188361
474.109	0.164847
473.458	0.128422
479.971	0.088575
507.974	0.0952315
547.7	0.0826662
589.38	0.0702482
590.683	0.0280005
563.982	0.0748969
575.053	0.0790597
577.007	0.0717127
589.38	0.0777305
580.914	0.0410425
591.985	0.0328385
615.43	0.0825591
629.107	0.0556965
649.947	0.0929503
727.445	0.0445639
760.008	0.0371151
825.784	0.0281066
880.489	0.014758
926.727	0.0181936
928.681	0.0343325
925.425	0.0219937
922.169	0.0211763
922.169	0.0374944
940.404	0.00734582
881.14	0.0291421
941.706	0.0361786
984.037	0.0114614
1023.76	0.0196569
819.271	0.0483216
903.282	0.0617797
961.895	0.0311699
943.009	0.0218706
939.101	0.00986835
970.361	0.0209673
989.247	0.0198401
1028.32	0.0205345
1018.55	0.0299125
1022.46	0.0206614
1028.97	0.0194811
1021.81	0.0139071
1030.93	0.011128
1038.74	0.016114
1038.09	0.0273726
1028.32	0.0104443
533.373	0.0115498
528.814	0.0582787
529.465	0.0238491
522.302	0.0203787
552.259	0.048108
583.519	0.0471589
578.96	0.0273093
587.427	0.0401541
612.825	0.0402476
676.648	0.00647653
665.576	0.0404633
715.723	0.0245595
732.004	0.0123804
719.63	0.0194889
741.773	0.0191795
684.463	0.022618
535.978	0.0277288
537.932	0.0165679
540.537	0.0451087
555.515	0.00710059
587.427	0.01431
585.473	0.0304778
614.779	0.0174972
653.203	0.0228795
674.043	0.0240687
659.064	0.0216178
689.673	0.0122909
657.761	0.00509807
649.295	0.0157747
680.555	0.0112574
650.598	0.024433
701.395	0.0140557
227.937	0.0381511
262.453	0.104863
270.92	0.0730929
268.966	0.0471737
269.617	0.0333661
276.781	0.0789914
291.108	0.0543452
317.158	0.0966887
314.553	0.0737681
337.347	0.0676517
344.511	0.064491
345.162	0.0608879
361.443	0.0873957
345.813	0.0883036
347.116	0.122797
366.653	0.128529
244.218	0.0180441
253.987	0.0340616
268.315	0.0883452
274.176	0.0596619
272.873	0.0488679
285.898	0.05791
277.432	0.0375825
279.386	0.0467385
304.133	0.0398314
324.973	0.0527246
327.578	0.0905923
345.162	0.103691
369.258	0.0883205
406.379	0.0772693
409.636	0.0276424
401.169	0.0587455
702.698	0.0387505
718.328	0.0201656
729.399	0.0146406
751.541	0.0153999
766.52	0.00499605
795.826	0.0202885
789.965	0.0203342
816.015	0.0256623
810.154	0.0317548
830.342	0.0189695
758.705	0.0353244
857.044	0.0366962
847.275	0.00361102
859.649	0.0252411
881.14	0.0311184
854.439	0.0202988
539.885	0.0119495
523.604	0.0071505
531.419	0.00582461
530.117	0.00751044
532.722	0.00218472
532.07	0.0162732
535.327	0.0186352
539.885	0.0194999
529.465	0.0199566
520.348	0.0340209
506.672	0.00948617
510.579	0.00945451
569.843	0.0417155
492.995	0.038116
561.377	0.066067
589.38	0.0462385
609.569	0.0127502
554.864	0.0335158
611.523	0.020476
619.338	0.0138267
615.43	0.00255893
612.825	0.0158316
610.872	0.0156564
623.245	0.0167342
619.338	0.0178891
625.85	0.0194347
619.338	0.0137259
618.687	0.00831403
537.28	0.012785
561.377	0.00400242
536.629	0.0484098
553.562	0.0369582
301.528	0.067215
339.952	0.113109
378.376	0.0848022
396.611	0.0914604
393.354	0.0696811
408.984	0.0569909
395.959	0.0633512
403.774	0.0955771
370.561	0.0462971
360.141	0.0555008
387.493	0.0832162
410.287	0.0910931
409.636	0.0892282
453.921	0.0617375
505.369	0.0145246
519.697	0.0822731
513.184	0.0223427
500.81	0.00304018
537.932	0.0217138
574.402	0.0156424
599.149	0.0179506
608.918	0.0303529
597.195	0.0132285
575.704	0.0407726
591.334	0.0299201
595.242	0.00560777
544.444	0.0680272
543.793	0.018815
555.515	0.00348607
560.725	0.0108247
558.772	0.0263352
529.465	0.0403017
259.848	0.095046
263.105	0.076443
234.45	0.0337437
215.563	0.0703338
215.563	0.109013
231.193	0.0665257
253.987	0.06911
292.411	0.119782
285.898	0.0988738
146.531	0.179063
178.442	0.0851061
251.382	0.0493434
224.681	0.045764
225.983	0.0680966
223.378	0.0600673
235.101	0.0898224
317.158	0.0613921
334.091	0.11104
334.742	0.0886497
326.276	0.0632516
314.553	0.0360141
320.415	0.136453
345.813	0.16447
429.173	0.10855
501.462	0.109016
600.452	0.145809
643.434	0.142144
620.64	0.0211916
586.775	0.0600605
644.085	0.144086
656.459	0.121812
642.132	0.0915306
924.122	0.0188348
913.051	0.0220238
907.19	0.0253596
920.215	0.0150943
875.279	0.00726655
868.115	0.0187028
861.602	0.00676419
875.279	0.0300101
871.371	0.0148649
860.951	0.0227106
885.699	0.0181578
901.98	0.00753767
895.467	0.0206993
902.631	0.02372
916.959	0.022002
944.962	0.0203006
1381.95	0.0198516
1247.14	0.0319354
1244.54	0.0269936
1180.71	0.0326018
1261.47	0.0746379
1316.17	0.0324
1303.8	0.00640243
1242.58	0.0452456
1288.17	0.069283
1344.83	0.0404019
1314.87	0.00965323
1338.32	0.0396258
1322.69	0.0781798
1381.95	0.0360888
1378.04	0.0192389
1389.77	0.0232188
401.821	0.0548583
413.543	0.0359586
408.333	0.0282188
439.593	0.02722
509.277	0.0378942
519.697	0.0220616
534.675	0.0119078
543.793	0.0412099
574.402	0.0337054
599.8	0.0522175
610.872	0.0197784
647.342	0.00410137
657.761	0.102802
666.879	0.0303879
664.274	0.0253764
682.509	0.0334664
265.058	0.221928
265.058	0.150479
255.29	0.153708
238.357	0.0614072
234.45	0.103836
231.845	0.180654
226.635	0.125019
228.588	0.224044
303.482	0.571439
280.037	0.247438
302.831	0.310533
240.311	0.268219
233.798	0.142675
362.746	0.171405
299.575	0.0733399
294.365	0.0664642
268.315	0.0555827
194.723	0.188198
205.795	0.0945497
325.625	0.0552002
313.251	0.123171
338.649	0.09497
334.091	0.0657123
351.674	0.0894794
377.073	0.125719
903.282	0.0281089
925.425	0.0317642
896.77	0.0104925
898.724	0.00572981
929.332	0.0268827
909.144	0.0206261
902.631	0.00663496
872.022	0.0304468
849.229	0.0329744
866.161	0.0614756
860.3	0.065981
843.367	0.0670377
846.624	0.0996543
620.64	0.0376688
612.174	0.0101819
616.082	0.0137154
588.729	0.00855307
614.128	0.0323213
634.317	0.0304395
612.825	0.046734
610.872	0.0389983
567.238	0.0247676
614.128	0.0395019
615.43	0.0671743
694.883	0.0427148
690.324	0.080383
676.648	0.119379
696.185	0.051798
705.303	0.0939553
496.252	0.0543383
496.903	0.132996
504.718	0.0731111
533.373	0.0604779
554.864	0.043345
545.095	0.0989572
519.045	0.0585172
583.519	0.0583323
627.804	0.1149
672.089	0.0727962
744.378	0.0369453
910.446	0.00522863
873.976	0.0185977
887.001	0.00769458
880.489	0.0073436
890.909	0.00714723
920.866	0.0199546
944.962	0.0218383
938.45	0.0303345
910.446	0.0279053
941.706	0.0209203
944.311	0.00482798
939.101	0.0120055
943.009	0.0458217
1000.97	0.0308638
1028.32	0.0144024
1034.83	0.023573
347.116	0.0657197
446.106	0.112608
475.412	0.138733
472.156	0.0313978
446.757	0.067209
551.608	0.144164
580.263	0.0713763
611.523	0.092183
708.559	0.216522
633.665	0.0386814
619.338	0.0916003
616.082	0.099203
580.914	0.150521
616.082	0.130977
611.523	0.141223
626.502	0.100894
200.585	0.108089
189.513	0.120501
177.791	0.0883391
179.093	0.0728348
196.677	0.0461202
207.097	0.0710023
216.215	0.0273014
242.916	0.0628076
282.642	0.142569
259.197	0.13264
262.453	0.111561
292.411	0.130937
265.71	0.0866791
274.827	0.0427394
292.411	0.127951
1157.92	0.0230431
1211.97	0.0227177
1297.94	0.0422264
1339.62	0.0110024
1355.25	0.0172165
1369.58	0.0157329
1404.74	0.00463883
1426.24	0.0160212
1423.63	0.0134037
1430.79	0.0160824
1417.12	0.0236256
1408.65	0.00548293
1406.7	0.00723189
731.353	0.0443088
733.958	0.0173454
767.171	0.0436976
786.058	0.0249761
819.922	0.0567928
819.922	0.0265554
806.246	0.0209595
815.364	0.0155675
787.36	0.0194305
802.99	0.00803052
817.317	0.0362878
814.061	0.0381383
814.061	0.00287338
833.599	0.0298463
858.997	0.0266163
869.417	0.0122451
1011.39	0.0135479
980.781	0.00645628
995.108	0.0145824
1022.46	0.000251267
1048.51	0.016098
1073.26	0.0217039
1104.52	0.0260796
1104.52	0.0165924
1136.43	0.0154097
1152.06	0.00587613
1174.85	0.0227883
1148.15	0.0191284
1155.97	0.018737
1148.8	0.0207821
1155.97	0.00606908
1172.9	0.0120057
250.08	0.0113996
283.945	0.151592
307.39	0.118367
328.229	0.141345
322.368	0.138738
362.746	0.132212
351.674	0.0981027
392.052	0.10636
425.266	0.133662
450.013	0.150654
466.946	0.164142
510.579	0.104925
563.33	0.130937
564.633	0.0433225
533.373	0.0375425
558.12	0.0851954
420.707	0.0194057
442.198	0.0344121
521.65	0.0271552
554.864	0.0291694
565.935	0.0335947
568.54	0.0627177
500.159	0.118698
509.277	0.0777407
625.199	0.129726
580.263	0.0264267
608.267	0.0941678
618.687	0.0558684
631.06	0.0270666
679.904	0.0319573
717.025	0.109558
674.694	0.0718972
265.058	0.234343
325.625	0.280862
334.742	0.286763
314.553	0.203502
315.856	0.241895
297.621	0.191967
300.226	0.153319
310.646	0.0233109
307.39	0.0443484
309.995	0.190087
332.137	0.189516
351.023	0.202849
378.376	0.123388
392.052	0.207025
364.048	0.0942032
328.881	0.0834556
330.834	0.104922
362.094	0.0874786
371.863	0.136328
358.187	0.165143
329.532	0.178141
336.696	0.15412
345.813	0.162902
377.073	0.147488
394.006	0.23114
377.724	0.204945
483.227	0.218754
369.258	0.174424
378.376	0.0621269
382.934	0.110525
349.069	0.0941428
336.696	0.18065
356.233	0.166633
357.536	0.213731
384.237	0.24604
388.144	0.212936
410.938	0.184576
390.749	0.134679
394.006	0.195717
396.611	0.129189
427.219	0.176952
866.161	0.0592593
801.036	0.0766826
842.065	0.0636438
887.001	0.0162148
870.72	0.0153579
943.66	0.0729014
950.824	0.0483871
989.898	0.0646972
970.361	0.0330204
937.799	0.0744179
948.87	0.0869563
993.806	0.0815196
1064.79	0.0661942
1081.07	0.0934542
1116.89	0.0791772
1106.47	0.0492922
147.182	0.0348296
158.905	0.0239007
188.862	0.0427477
210.353	0.200062
192.118	0.154182
201.887	0.121847
225.983	0.117117
237.055	0.218414
254.638	0.213776
253.336	0.160368
234.45	0.220596
240.311	0.14419
233.798	0.0382377
236.403	0.0133311
221.425	0.0399178
1146.2	0.00169582
1124.71	0.0140648
1114.29	0.0214482
1141.64	0.0127217
1135.78	0.0302835
1147.5	0.023137
1144.9	0.0139378
1152.06	0.00814335
1155.97	0.012062
1165.74	0.00354912
1161.83	0.0143197
1168.99	0.00928886
1184.62	0.0191322
1192.44	0.0255738
1198.3	0.0121875
1199.6	0.0098127
107.456	0.0579836
179.745	0.0678072
177.791	0.0312851
173.883	0.034094
188.211	0.0571409
169.325	0.00177051
184.955	0.0197875
181.698	0.0257787
181.047	0.0184694
178.442	0.0212438
183.001	0.0296912
183.652	0.0142278
184.955	0.0167742
183.652	0.0305684
180.396	0.00825935
182.35	0.0192703
1377.39	0.0137149
1298.59	0.0164757
1281.01	0.0424879
1348.74	0.0451434
1352.64	0.0195587
1365.02	0.0278908
1345.48	0.0138648
1388.46	0.0145924
1357.85	0.0137758
1353.3	0.0147539
1362.41	0.0245983
1394.98	0.00655504
1415.16	0.0270291
1403.44	0.0165533
1396.93	0.00878766
1376.09	0.00736732
539.885	0.03497
513.835	0.0232232
515.789	0.0257454
531.419	0.0268366
534.675	0.0330347
566.587	0.0202311
589.38	0.0114863
599.8	0.00432485
625.199	0.0105741
644.737	0.0105378
670.135	0.021579
684.463	0.011883
706.605	0.0137989
727.445	0.0305338
720.281	0.0187861
728.748	0.0247885
797.78	0.005642
795.175	0.0167255
816.666	0.0120918
803.641	0.0156752
839.46	0.0141509
836.204	0.00851277
830.994	0.00523582
845.321	0.00927875
824.481	0.0389515
858.997	0.0221021
847.275	0.0128208
843.367	0.0149129
872.022	0.0228086
875.279	0.0231331
894.816	0.0109166
907.841	0.00530118
538.583	0.0134726
539.234	0.00812347
541.188	0.0214997
557.469	0.0388455
560.725	0.0203238
577.007	0.0156026
584.17	0.0151378
586.775	0.00890362
595.242	0.0252543
603.708	0.0109096
599.8	0.0190872
604.359	0.0141351
608.267	0.020108
616.082	0.0237269
619.338	0.00754346
644.737	0.0202691
153.695	0.019823
173.883	0.0432268
174.535	0.0360889
175.837	0.0429063
181.047	0.0130485
182.35	0.00197095
188.211	0.020936
187.56	0.0459582
183.001	0.0264003
202.538	0.0184452
195.375	0.0109276
196.026	0.0246235
201.887	0.021674
194.723	0.0124665
202.538	0.0197676
204.492	0.0061499
501.462	0.0180759
526.209	0.0122208
544.444	0.031938
580.914	0.0365663
591.985	0.0190438
588.078	0.0145895
586.124	0.0107425
599.8	0.00792101
603.708	0.0141768
595.893	0.00698775
610.872	0.0232204
611.523	0.00459295
614.128	0.0181972
618.687	0.0233975
617.384	0.0115558
603.708	0.00949523
880.489	0.0115028
862.254	0.00267092
862.905	0.0230244
900.026	0.0200511
877.232	0.0408589
895.467	0.0072965
898.724	0.0172011
905.887	0.0268465
901.329	0.0110148
909.144	0.0121715
924.774	0.0229441
915.656	0.0238848
941.055	0.0190136
924.774	0.0125683
939.752	0.00400059
943.66	0.00326111
722.235	0.0379651
761.961	0.042587
763.264	0.00773615
816.666	0.0389056
830.342	0.0495458
859.649	0.0221809
877.884	0.0262228
847.275	0.0265561
886.35	0.0273082
922.82	0.0265232
928.03	0.0187048
927.379	0.0399884
931.937	0.0192505
937.799	0.00375835
937.147	0.00775295
935.845	0.0120954
841.414	0.0259379
830.994	0.00810711
817.317	0.0193391
850.531	0.021412
845.972	0.0400757
849.88	0.00474235
857.044	0.0209067
833.599	0.0357787
851.182	0.0346208
868.766	0.00954729
868.115	0.0176433
858.346	0.0327396
857.044	0.0202013
842.716	0.012348
852.485	0.00573444
853.136	0.0095545
352.326	0.102904
360.141	0.0540495
353.628	0.0520276
367.956	0.0678272
369.909	0.0746016
382.934	0.0478547
392.052	0.0726948
403.774	0.0475034
399.867	0.0723371
384.888	0.0693169
334.091	0.0624101
324.322	0.0467699
326.276	0.0902885
337.998	0.102227
350.372	0.0923971
341.906	0.0528328
239.008	0.124702
264.407	0.0599802
255.29	0.0444525
260.5	0.0364233
283.945	0.0457984
303.482	0.00817151
299.575	0.0642833
302.831	0.0364598
331.486	0.0626255
341.906	0.0592675
283.293	0.0129948
261.802	0.0301077
277.432	0.0215891
283.293	0.0131899
296.318	0.00596959
315.205	0.00752405
331.486	0.0412016
339.301	0.0130862
351.023	0.027509
362.094	0.0157851
373.817	0.0143276
370.561	0.0345435
381.632	0.0206473
377.724	0.0149371
384.888	0.0068854
382.283	0.0227429
380.981	0.0153943
219.471	0.00374822
227.937	0.00800598
227.286	0.0187344
240.311	0.00726724
243.567	0.0027915
246.823	0.0297766
244.218	0.00285896
245.521	0.0248246
257.895	0.0184691
268.315	0.00737803
269.617	0.0391115
272.222	0.0185368
276.781	0.0272299
278.083	0.00536712
282.642	0.0118274
282.642	0.0177444
585.473	0.0215629
582.868	0.0140361
594.59	0.00364557
605.01	0.00309926
610.872	0.02237
612.174	0.0310548
616.082	0.0127801
618.687	0.0243428
638.875	0.00524687
634.968	0.00160851
637.573	0.0280432
633.665	0.0162096
646.69	0.0256176
643.434	0.00547459
662.32	0.01161
660.366	0.0142143
1082.38	0.0194827
1095.4	0.0209699
1088.89	0.0134345
1099.96	0.0102509
1092.8	0.00184717
1101.26	0.0254432
1108.43	0.0151651
1100.61	0.0225189
1104.52	0.0132118
1109.73	0.00353674
1105.17	0.0303386
1110.38	0.0191893
1112.98	0.0174958
1107.77	0.000638732
1114.29	0.0153497
1110.38	0.0157436
974.269	0.00990912
955.382	0.0192525
969.71	0.00627098
987.293	0.0198397
[truncated: 6,233 more rows]

## Sheet: Fig2G
< 0.5mm from scratch	0.5-1mm from scratch	>1mm from scratch
1.04659	0.292506	0.037383
0.059356	0.179208	0.026084
0.037638	0.128946	0.025083
		0.037716
0.009883	0.026359	0.022001
0.016755	0.171255	0.002627
0.017993	0.091692	0.01483
0.009808	0.016782	0.033725
0.036701	0.034696	0.010423
0.038273	0.012139	0.019794
0.045122	0.193725	0.062256
0.022656	0.006452	0.017865
0.029488	0.024262
0.008608	0.039457	0.003625
0.025852	0.042283	0.008503
0.042696	0.030867	0.032515
0.014409	0.192443	0.021342
0.015315	0.014923	0.010384
0.018402	0.011599	0.013106
	0.1778	0.011519
0.043714	0.024521	0.007093
0.031403		0.01995
0.009133	0.166259	0.008944
0.012253	0.055843
0.016282	0.009944	0.012618
0.018949		0.021206
0.035823	0.032394	0.006849
0.022025		0.01693
0.030321	0.022799	0.009303
0.028691		0.016976
0.104231	0.020951	0.008234
0.176583	0.021946	0.016833
	0.095723	0.029783
0.146812	0.035476	0.00624
0.01267	0.149907	0.01936
0.090527	0.023636	0.01999
0.193204	0.039344	0.015399
0.051572	0.088581	0.029724
0.043824	0.012873	0.027958
0.020723	0.043389	0.003293
0.172363	0.008719	0.031969
0.039406	0.026097	0.020462
0.058678	0.043923	0.02595
0.094707	0.023624	0.021914
0.009449	0.127935	0.003888
0.031733	0.187803	0.015314
0.021836	0.018948	0.007608
0.01295	0.020237	0.057984
0.044057	0.021567
0.016936	0.025015	0.043853
0.007896	0.02083	0.056017
	0.023487	0.016176
0.069351	0.016061	0.040595
0.027596	0.026277	0.010202
	0.028617	0.014111
	0.008089	0.006805
0.126796	0.013246	0.014643
0.02441	0.060484	0.034872
0.120161
0.030795	0.00934	0.018367
0.007562	0.242518	0.019823
0.250673	0.009346	0.013859
0.010905	0.015858	0.041563
	0.009309	0.002523
0.15532	0.019953	0.016534
0.195787	0.017352	0.01505
0.012515	0.114369
	0.01711	0.035016
0.115006	0.011415	0.007538
0.044974	0.029268	0.024161
0.010697	0.01892	0.010591
0.020879	0.141525	0.022076
	0.019537
	0.034191
0.073442	0.008743	0.005305
0.034019	0.03054	0.023136
0.00616	0.060339	0.099752
0.126593	0.026682	0.001771
0.038763	0.009907	0.01779
0.099115	0.017897	0.037754
0.006756	0.023428	0.016241
0.220338	0.008922	0.031976
0.066548	0.037325	0.020681
0.034247	0.004405	0.096837
0.033225	0.013451	0.034094
0.048153	0.020117	0.043227
	0.016068	0.036089
0.088223	0.027332	0.008166
0.032574	0.015742	0.042906
0.248612	0.011377	0.01702
0.019399	0.019478	0.104206
	0.018531	0.031285
	0.0126	0.010349
0.026703	0.015226	0.003544
0.102995	0.016636	0.021244
0.03004	0.02198	0.016032
0.027515	0.017278	0.015024
0.011773	0.027908	0.018269
0.002126	0.010513	0.067807
0.022272	0.034037	0.010618
0.017115	0.155538	0.008259
0.017831	0.088292
	0.005666	0.011783
0.024514	0.025196	0.006394
0.039282	0.012157	0.071601
0.008975	0.003505	0.025843
0.021533	0.018504	0.018469
0.021797	0.026049	0.013049
0.020779	0.013799	0.031467
0.004521	0.008033	0.032601
0.207056	0.024735	0.055631
0.01852	0.066556	0.025779
0.01667	0.032546	0.016109
0.082666		0.01927
0.013702	0.034268	0.001971
0.036906	0.006249	0.031419
0.012446	0.005755	0.031881
0.043661	0.007713	0.043568
0.021163		0.029691
0.021511	0.00806	0.0264
0.008874	0.024205
0.052666	0.02119	0.007579
0.014339	0.018174	0.014228
	0.069724	0.030568
0.018034	0.005998	0.004338
0.003425	0.004537	0.022388
		0.019787
0.018149	0.016506	0.016774
0.042078	0.030012	0.016004
0.124786	0.008818	0.009753
0.035149	0.012489	0.02295
0.035844	0.028369	0.00063
0.022097	0.028247	0.065762
0.032729	0.01188	0.018458
0.124101	0.031831	0.019201
0.02046	0.141487	0.005036
0.038356	0.138576	0.016496
0.024006	0.046579	0.045958
0.055393	0.01858	0.031296
0.25009	0.014995	0.002964
	0.019026	0.004669
0.028898	0.014113	0.020853
0.01414	0.010067	0.006475
0.11526	0.011958	0.085844
	0.007687	0.036352
0.022202	0.016915	0.057141
0.079871	0.034552	0.020936
0.017297	0.020568	0.015489
0.040593	0.015375	0.01888
0.055429	0.009689	0.040885
0.014943	0.131815	0.026461
0.021851	0.035648	0.003058
0.02791	0.005121	0.010205
	0.011003	0.017627
0.103784	0.023197	0.023766
0.034405	0.033724	0.010447
0.076731	0.041309	0.018636
0.040896	0.028226	0.014327
0.006218	0.217224	0.007266
0.303911	0.021314	0.038466
0.019246	0.0051	0.020969
0.142611	0.030526	0.003717
0.039764	0.034853	0.012466
0.086641		0.0364
0.022865	0.038933	0.005726
0.024518	0.005615	0.010928
0.022536	0.023174	0.024624
0.126034	0.029437
0.098277	0.003321	0.011609
0.176755	0.210759
0.105653	0.018416	0.018727
0.226215	0.109602	0.031384
0.012774	0.027289	0.025627
0.038648	0.041792	0.05676
0.004693	0.030346	0.023494
0.015677	0.029552	0.017583
	0.009821	0.007756
0.016329	0.009222	0.014135
0.076656	0.012958	0.021674
0.02386	0.031652	0.029256
0.047828	0.105865	0.018445
0.08975	0.008668	0.019768
0.048634	0.02339	0.021312
0.01977	0.030577	0.008387
0.011446		0.013698
0.044308		0.126448
0.048221	0.023794
0.036649	0.013857	0.061914
0.060661	0.018945	0.027606
	0.016217	0.030828
0.100606	0.008404	0.00615
0.006762
0.029438	0.015649
0.036938	0.020881	0.016432
0.088388	0.024877	0.011124
0.02653	0.095861	0.035277
0.044373	0.019999	0.020935
0.011048	0.00804	0.033
0.00449	0.034518	0.012213
0.024963	0.014327	0.165014
0.020641	0.084564	0.014151
0.053441	0.018529	0.021783
0.013626	0.034113	0.008056
0.158355	0.010075	0.040324
0.146308	0.034515
0.024642	0.006925	0.017886
0.023598	0.014063	0.010623
0.022864	0.046148	0.030521
0.030424	0.01025	0.003748
0.256135	0.011246	0.214111
0.047475	0.03786	0.04367
0.078875	0.032534	0.059143
0.157688	0.006162	0.015871
0.08698		0.058228
0.017126	0.01693	0.121364
0.122007	0.035044	0.021264
0.161945	0.017185	0.072647
0.011259	0.039134	0.065189
0.000897	0.016393	0.022374
0.01811	0.030415	0.01678
0.042195	0.00542	0.007047
0.048833		0.020686
0.072301	0.006516	0.081982
0.086713	0.002939	0.039747
0.022348		0.018734
0.176625	0.034052	0.073627
0.048475	0.008754	0.008006
		0.015869
0.020286	0.00711	0.036882
0.113154	0.020909	0.017063
	0.129239	0.036108
0.015203	0.04385	0.023047
0.074052	0.02068	0.110051
0.015038	0.021434	0.023565
0.022476	0.179063	0.021992
0.047611	0.009089	0.022537
	0.030248	0.024922
0.004987	0.019601	0.026874
0.024153	0.014307	0.035199
0.047518	0.012752	0.056115
0.01107	0.03483	0.066915
0.013232	0.023198	0.080974
0.007231	0.026166	0.124702
0.030151	0.006187	0.028629
0.025774	0.009294	0.039377
0.008162	0.015801	0.03659
0.029344		0.161032
0.092347		0.025333
0.028351	0.019513	0.007267
0.154896		0.008367
0.032076	0.020387	0.013487
0.029936	0.05061	0.022065
0.245248	0.022021	0.068993
0.00445	0.026785	0.04618
	0.024799	0.002791
0.07752	0.007943	0.027982
0.081319	0.153236	0.002859
0.050664	0.003172	0.017063
0.010477	0.015833	0.056458
0.017374	0.026337	0.024825
0.03293	0.015086	0.00652
0.216496
0.06743	0.043491	0.029777
0.012909	0.017952	0.005889
0.025308	0.038548	0.023582
0.045658	0.138472	0.076606
0.049631	0.21134	0.083447
0.028573	0.002702	0.04062
0.034381	0.008308	0.022598
0.054549	0.033003
0.053007	0.020284	0.01776
	0.045539	0.044453
0.097946	0.023391	0.05981
0.021986	0.075658
0.015483	0.039561	0.037681
0.013683	0.009794	0.011326
0.023237	0.030606	0.018469
0.021534	0.039111	0.017329
0.026172	0.013141	0.015991
0.075095		0.09672
0.050094	0.057606	0.002947
0.038892	0.007145
0.041096	0.029911	0.194865
0.015807		0.034443
0.012242	0.04368	0.036423
0.009391		0.019851
0.035033	0.011172	0.008806
0.043996	0.032549	0.041548
0.04171		0.030108
	0.0232
0.054143	0.075722
0.144001	0.020203	0.05998
0.013526	0.00706	0.024698
0.048063		0.186946
0.010488	0.026734	0.069108
0.017444	0.005039	0.007378
0.017732	0.004532	0.032408
0.083353	0.007274	0.039111
0.020383	0.025873	0.019268
0.029385	0.047241	0.02509
0.015023	0.023247	0.047379
0.161012	0.006925
0.036378	0.00229	0.018537
0.029682	0.006955	0.013337
0.029321	0.018883	0.020788
0.053475	0.015081
0.049607	0.011242	0.240205
0.023109	0.027179	0.02723
0.015467	0.025469	0.021589
0.030161	0.024547	0.010191
0.008073	0.010389	0.005367
0.211952	0.022752	0.033131
0.038639	0.193168	0.011827
0.062973	0.001724	0.017744
0.095861	0.016824	0.117761
0.011213	0.037112	0.012995
0.017919	0.01818	0.01319
0.012803	0.046177	0.045798
0.130356	0.013468	0.07544
0.109807	0.003165	0.016057
0.0068	0.019812	0.041677
0.061851	0.025413	0.01102
0.005699	0.037226	0.171112
0.028931	0.023761	0.006474
0.056158	0.002686	0.029797
0.040419	0.012121	0.023948
0.063147	0.012615	0.00597
0.021295	0.019213	0.071674
0.111108		0.152179
0.122688	0.026415	0.234887
0.049744	0.022073	0.064283
0.039831	0.010431	0.017152
0.008332	0.043465	0.162975
	0.026433	0.03646
0.126561	0.013708	0.024808
	0.015343	0.008172
0.124023	0.012552	0.02583
0.076207	0.025642	0.026806
0.030797	0.012615	0.012694
0.038339	0.005048	0.032845
0.015839	0.052934
		0.045728
0.02442	0.015873	0.037124
0.014287	0.014604	0.024115
0.124625	0.025481	0.174961
0.062718	0.023901	0.013924
0.071316	0.017159	0.087774
0.17698	0.032777	0.054388
0.077737	0.022749
0.027869	0.009842	0.007524
0.07504	0.024326	0.054873
0.047029	0.038093	0.080092
0.025096	0.024326	0.103247
0.112822	0.085803	0.010794
0.101011	0.01696	0.122277
0.033233	0.007429
0.015081	0.006916	0.007457
0.079626	0.036505	0.028196
0.153268	0.009183	0.019141
0.058588	0.015444	0.077997
0.018148		0.04677
0.019558	0.018058	0.047238
0.188198	0.057508	0.090289
0.1417	0.043595	0.017318
0.031422	0.019639	0.027441
0.005174	0.130614	0.062626
	0.028678	0.041202
0.021822	0.02693	0.054997
0.005253	0.033231	0.028331
0.030702	0.014796	0.06241
	0.005213	0.102227
0.050232	0.013439	0.068983
0.106771	0.023587	0.013086
0.011485	0.013603	0.081032
0.061471	0.011884	0.052833
0.0344	0.006659	0.059268
0.02373	0.090416	0.023505
0.017021	0.045116
0.023957	0.045598	0.118479
	0.011147	0.096266
0.009151	0.035904	0.092397
0.065968	0.008661	0.027509
0.162988	0.009989	0.102904
0.024474	0.050829	0.150648
0.014177	0.085547	0.023156
0.013174	0.007868	0.146491
0.023769	0.006571	0.052028
	0.025761	0.041353
0.04087	0.008125	0.071859
0.009657	0.025593	0.061701
0.03215	0.031237	0.054049
	0.033283	0.177688
0.039871	0.007331	0.015785
0.027587	0.015952	0.071405
0.025576	0.019311	0.018311
0.020385	0.008187	0.028124
0.079233	0.024522	0.045787
0.119835	0.028029	0.067827
0.012897	0.017709	0.074602
0.021728		0.034544
0.009907	0.062561	0.00717
0.025444		0.014328
0.026762	0.032174	0.029126
0.047269	0.018352	0.014937
0.152482	0.020268	0.08145
0.034004	0.166141	0.014982
0.014971	0.028166	0.015216
0.091048	0.032956
0.009242	0.030799
0.016877	0.016114
0.04287
0.13334	0.043552
	0.011969
0.087556
0.022527	0.020622
0.015275	0.036638
0.038924	0.017111
0.159307	0.015615
0.006324	0.014548
0.096786	0.028972
0.148196	0.006344
0.017269	0.030729
0.040984	0.01232
0.008292	0.014739
0.131458	0.025591
0.208688	0.00797
0.024318	0.011349
0.010283	0.006322
0.024016
0.017582	0.086713
0.025568	0.021368
0.07606	0.009561
0.134851	0.015568
0.093265	0.017537
0.026733	0.027365
0.065106	0.035693
0.077678	0.046608
0.026245	0.028758
0.024566	0.036791
	0.020038
0.024257	0.032383
0.014997	0.027292
0.038837	0.022711
0.025748	0.021542
0.045886
0.085586	0.011522
	0.0192
0.058673	0.048197
0.01067	0.016876
0.025787	0.016099
0.04288	0.02179
0.010729	0.031467
0.010199	0.011767
0.031186	0.030887
0.067557	0.043688
0.045081	0.016686
0.157447	0.015439
0.111086	0.012499
0.010448	0.038856
0.022735	0.022176
0.010907	0.00622
0.09455	0.041278
0.026666	0.033673
0.077495	0.017855
0.002317	0.022317
0.045485	0.040543
0.012747
0.081231	0.025935
	0.046453
0.010706
0.02334	0.054236
0.021041	0.005805
0.016607	0.020759
0.121977	0.039057
0.125018	0.050443
	0.0269
0.095161	0.024862
0.030295	0.016936
0.088186
0.126062	0.042278
0.08507	0.020754
0.079253	0.00509
0.013694	0.010689
0.020324	0.027674
0.027813	0.019094
0.012249	0.02609
0.03512	0.009796
0.047827	0.019093
0.006325	0.019748
0.141059	0.010148
0.128992	0.023423
0.053202	0.027163
0.007601	0.020676
	0.018621
0.042624	0.004939
0.036041	0.018549
0.012494	0.029873
0.055602	0.003936
0.014903
0.045325	0.026155
0.034354	0.024935
0.049614	0.032535
0.020688	0.023717
0.088201	0.009547
0.001804	0.015846
0.091024
0.13736	0.028526
0.018126	0.064322
0.031091	0.035444
0.021851	0.068435
0.016921	0.01716
0.126795	0.017148
0.035775	0.057691
0.04292	0.011823
0.088471	0.006536
0.049825
0.329652	0.038267
0.006808	0.001004
0.014765
0.206709	0.010931
0.035638	0.011474
0.009114	0.016536
0.056098	0.219188
	0.025203
0.09035	0.000847
0.039764	0.010148
0.126919	0.044519
0.021719	0.01188
0.008602	0.016447
0.228102
0.076071	0.032675
0.096198	0.017937
0.086194	0.01933
0.050217	0.009799
0.006523	0.019452
0.047818	0.02142
0.082375	0.020768
0.035367	0.012902
0.107621	0.010624
0.055303	0.01477
0.130277	0.012014
0.040395	0.013549
0.087508	0.012594
0.048518	0.068943
0.057067	0.021459
0.038361	0.051127
0.024573
0.013553	0.007078
0.101589	0.021669
0.055028	0.007401
0.161456	0.003375
0.115531	0.037989
0.089835	0.03079
0.050339	0.037367
0.163158	0.088339
0.109229	0.020412
	0.011763
0.014728	0.023273
0.096722	0.014134
0.032278	0.059001
	0.112207
0.025919	0.045378
0.199863	0.006752
	0.02549
0.235961	0.04013
0.059716	0.045388
	0.005249
0.025751	0.085106
0.02429	0.019535
0.068327	0.039014
0.017216	0.112824
0.056135	0.072835
0.115813	0.015238
0.037545	0.027452
0.040805	0.016052
0.118039	0.005623
0.034384	0.037142
0.089087	0.142402
0.128413	0.02737
0.060818	0.061866
0.035452	0.014573
0.018808
	0.047418
0.273019	0.008723
0.008694	0.006538
0.028779	0.06454
0.097592	0.016295
0.023602	0.021774
	0.052133
0.022283	0.010225
0.103382	0.030275
0.087931	0.263089
0.049397	0.021313
0.028934	0.015784
0.161472	0.02296
0.203465	0.021922
0.21924	0.029407
0.046245	0.003241
0.035584	0.021971
0.080954	0.020351
0.095207	0.012415
0.017498	0.013692
0.032215	0.028113
0.015815	0.014622
0.022912	0.010583
0.046042	0.017031
0.092287	0.018736
0.161631	0.025904
0.067815	0.097554
0.068042	0.038657
0.054423	0.021982
0.077402	0.021003
0.038845	0.09626
0.115431	0.027637
0.011723	0.044072
	0.018259
0.032325	0.034605
0.125019	0.078041
0.077004	0.009382
0.064046	0.015297
0.059305
0.070869	0.018295
0.019178	0.008741
0.099765	0.026778
0.105439	0.012758
0.015921	0.01279
0.054711	0.068072
0.335423	0.029383
0.063228	0.02127
0.025688	0.017107
0.224044	0.037801
	0.021794
0.055995	0.033006
0.011051	0.006349
0.027127	0.003068
0.012174	0.055986
0.034381	0.104972
0.011087	0.017427
	0.016685
0.228834	0.007312
0.127415	0.021548
	0.009536
	0.019313
0.21885	0.033482
0.024338	0.042458
	0.062442
0.033092	0.042958
0.040974	0.019708
0.027543
0.004484	0.170427
0.035586	0.048885
0.098951	0.164099
0.004657
0.110162	0.099378
0.10362	0.00846
0.242271	0.014509
0.043185	0.020302
0.035671	0.009035
0.022163	0.104702
0.019702	0.012422
0.198306	0.046132
0.048084	0.109524
0.180654	0.172767
0.079317	0.038556
0.253263	0.076504
0.014324	0.021949
0.01433	0.014701
0.026888	0.016925
0.012541	0.015259
0.10656	0.028475
0.274868
0.109497	0.018608
0.038185	0.009418
0.243381
0.036746	0.146283
0.109574	0.020087
0.007355	0.067624
0.037133	0.041097
0.142675
	0.008283
0.059046
0.061014	0.012628
0.108284	0.031079
0.103836	0.016981
0.037509	0.053315
0.037244	0.009628
0.205479	0.037962
0.003451	0.019915
0.053788	0.008325
0.329826	0.021881
0.048967	0.027933
0.225235	0.020469
0.145914	0.042748
	0.002978
0.012095	0.181441
0.005333	0.109598
0.107947	0.026446
0.044178	0.03829
0.065518	0.069585
0.020525	0.028284
0.077683	0.120501
0.082111	0.03687
0.04016	0.030206
0.126072	0.053102
0.278771	0.048245
0.04516	0.032638
0.061407	0.027987
0.016308	0.052807
0.058377	0.016065
0.039735	0.015706
0.033013	0.045888
0.076476	0.075707
0.068649	0.011851
0.031878	0.322586
0.023146	0.040486
0.0837	0.014674
0.081512	0.041764
0.151822	0.029328
0.115561	0.009293
0.02197	0.043264
0.049787	0.025513
0.268219	0.02725
0.139679	0.056271
0.223107	0.031888
0.037394	0.03025
0.023335	0.025564
0.072493
0.108038	0.264861
	0.000918
0.220966	0.154182
	0.036388
0.200344	0.036988
0.101286	0.001279
0.174948	0.026122
0.040351	0.007756
0.126391	0.016863
0.15645	0.049979
0.123046	0.071087
0.077778
0.153087	0.017453
0.044399
	0.242784
0.185517	0.028269
0.109877	0.005207
0.029618	0.015346
0.049381	0.02683
0.096349	0.028113
0.051491	0.034394
0.050805	0.015928
0.015397	0.012744
0.068624	0.067639
0.089739	0.02322
0.045888	0.042131
0.051981	0.036331
0.022907	0.011673
0.01344	0.010686
0.056742	0.014471
0.01438	0.007711
	0.030222
0.084807	0.071898
0.007459	0.083971
0.090339	0.070532
0.167688	0.018865
0.107885	0.022423
0.039857	0.022407
0.017536	0.01469
0.089468	0.032689
0.102267	0.043814
0.063075	0.064631
0.030519	0.051438
0.020363	0.024841
0.036738	0.091744
0.130416	0.024089
0.028737	0.0318
0.201684	0.199679
0.025335	0.008102
0.112565	0.01451
0.064377	0.042071
0.173852	0.025053
0.042785	0.009943
0.03451	0.006398
0.030992	0.008525
0.124282	0.025896
0.171559	0.013764
0.074046	0.04612
	0.096604
0.005846	0.038332
0.127576	0.027427
0.033159	0.026549
0.03753	0.02219
0.227381	0.147324
0.113478	0.075716
0.150008	0.099097
0.056812	0.03521
0.075332
0.008803	0.113089
0.050511	0.04833
0.04101
0.093189	0.105654
0.144946	0.032311
0.013414	0.021867
0.041654	0.008197
0.048004	0.04413
0.087773	0.032032
0.069102	0.022126
0.088399	0.0174
0.115778	0.01378
0.143349	0.066914
0.040768	0.015726
0.223958	0.033531
0.017818	0.040891
0.097711	0.016191
0.219913	0.019925
0.184783	0.00661
0.040304	0.151067
0.08582	0.079636
0.137524	0.027497
0.065638	0.024076
0.028554	0.098566
0.040002	0.011025
0.160452	0.034379
0.023266	0.044449
0.323301	0.073827
0.01628	0.019004
	0.108089
0.112714	0.050871
0.035832	0.019398
0.140471
0.111034	0.142242
0.174004
0.041967	0.031585
	0.176427
	0.112418
0.152718	0.048179
0.011441	0.088283
0.025587	0.289849
0.00754	0.03567
0.03858	0.008444
0.109808	0.121847
	0.061732
0.036807	0.021821
0.279929
0.109183	0.004988
0.101925	0.008622
0.076651	0.0286
0.01794	0.029654
0.017057	0.029196
	0.020375
0.045401	0.022732
0.015791	0.305368
0.042699	0.101086
0.15761	0.058079
0.124118	0.030998
0.022299	0.083366
0.03004	0.04203
0.08625	0.022831
0.092882	0.038331
	0.028124
0.021009	0.04092
0.121114	0.018713
0.041356	0.12788
0.125612	0.033647
0.334583	0.012254
0.086395	0.009043
0.025246	0.004069
0.153708	0.020871
0.10013
0.040536	0.026265
0.016057	0.018493
0.040667	0.023378
0.033443	0.14746
0.058727	0.05614
0.019652	0.017859
0.017733	0.015309
0.092718	0.010771
	0.038485
0.21657	0.021192
0.142169	0.087994
0.116086	0.021374
0.014188	0.009457
0.088475	0.011606
0.011064	0.020439
0.048542	0.021521
0.092712	0.054299
0.129219	0.004486
	0.013043
0.01083	0.012053
0.104009	0.020489
0.03259	0.071002
0.140147	0.07298
0.21834	0.044638
0.012537	0.022822
0.046818	0.051202
0.036671	0.28329
0.02304
0.060178	0.036273
0.081991	0.124636
0.095399	0.023531
0.134196	0.048356
0.099311	0.01321
0.007769	0.014274
	0.129767
0.018022	0.184274
0.070136	0.074476
0.053609	0.228031
0.028603	0.024129
0.052893	0.128113
0.032074	0.06275
0.061406	0.029592
0.039328	0.013949
0.085783	0.045709
0.129319	0.089492
0.279119	0.025586
0.0835	0.014434
0.050864	0.038061
0.163037	0.030106
0.016156	0.191772
0.048611	0.074087
0.067745	0.025182
0.307767	0.074852
0.063662	0.160959
0.159768	0.022909
0.186619	0.004623
0.011524	0.009055
0.119701	0.047331
0.112052	0.002347
0.187588
0.037762	0.047267
0.068397	0.089415
0.018865	0.023258
0.047883	0.016169
0.032276	0.006351
	0.200062
0.221928	0.034658
0.150479	0.029137
0.201524	0.017127
0.029614	0.013317
0.119102	0.226183
0.189171	0.05894
0.06861	0.018642
0.369897	0.012302
0.114776
	0.006227
0.064712	0.060571
0.102958	0.02468
0.208389	0.027899
0.099295	0.00457
0.043996	0.013377
0.049595	0.01921
0.050554	0.015999
0.021956
0.186554	0.06043
0.239984	0.088114
0.286126	0.035811
0.069387	0.01929
0.024879
0.022776	0.06521
0.010185	0.073014
0.04163	0.237713
0.426177	0.039754
0.097996	0.043704
0.241368	0.096224
0.038735	0.084181
0.044709	0.238052
0.022185	0.0524
0.055583
0.103082	0.072067
0.016847	0.011835
0.114588
0.051265	0.011549
0.26128	0.033362
0.137359	0.025725
0.217568	0.009097
0.004217	0.014372
0.093473	0.022455
0.155185	0.014404
0.091966	0.023597
0.030804	0.016923
0.239533	0.115142
0.059843	0.069325
0.355179
0.277702	0.010539
0.080082	0.00745
	0.009312
0.019785	0.039458
0.174396	0.219368
0.130512	0.255834
0.335768	0.065776
0.063192
0.023436	0.060423
0.062822	0.119347
0.043949	0.006061
0.020683	0.006889
0.138362	0.070334
0.226539	0.109013
0.145677	0.090213
	0.158079
0.080088	0.044854
0.039345	0.169904
0.064289	0.015823
0.022706
	0.018415
0.042002	0.015898
0.040745	0.022262
	0.027301
0.002115	0.032353
0.045634	0.008925
0.075299	0.005851
0.052281	0.034884
0.179402	0.118268
0.063532	0.078789
0.066724	0.226357
0.011959	0.273109
0.022804	0.061788
0.026278	0.020103
0.163959	0.04462
0.1536	0.03447
0.094958	0.033752
0.122728
0.125246	0.022893
0.106226	0.02566
0.023814	0.072666
0.043987	0.227425
0.0348	0.011255
0.064668	0.141522
0.194063	0.003238
0.044779	0.043005
0.04603	0.059234
	0.194015
0.023792	0.002171
0.106018	0.035079
0.111104	0.101844
0.115276	0.014889
0.062868	0.014084
0.035219
	0.116312
0.011839	0.269209
0.237603	0.007336
0.159251	0.022653
0.019464	0.112944
0.082569	0.105851
0.023534	0.209987
0.030721	0.014131
0.00929	0.003312
0.108124
0.051604	0.025465
	0.093215
0.132021	0.157966
0.108224	0.023377
0.030724	0.02472
0.057854	0.005685
0.041416	0.00863
0.037206	0.039918
0.016319	0.048944
0.075714	0.024075
0.277344	0.023427
0.043413	0.08014
0.05814	0.009797
0.04257	0.015432
0.028778	0.033546
0.072276	0.005848
0.09101	0.274117
	0.05007
0.022326	0.007372
0.132328
0.099854	0.041453
0.05733	0.106024
0.229167	0.018575
0.094223	0.026181
0.260252	0.055232
0.120652	0.037032
0.073161	0.169653
0.033841	0.034511
0.017296	0.035761
0.048138	0.014096
0.247438	0.060067
0.065641	0.032383
0.125454	0.053026
0.027067	0.017809
	0.010519
0.022812	0.05149
0.024746	0.054262
0.051809	0.04453
	0.040124
0.163846	0.077767
0.247237	0.045764
0.02452
0.117913	0.127969
0.034737	0.052934
0.036316	0.013096
0.1436
0.257469	0.117117
0.121472	0.067136
0.127337	0.068097
0.121748	0.168572
	0.022879
0.097711	0.027452
0.00813	0.006627
0.094091	0.010325
0.052145	0.015368
0.101186	0.022799
0.044485	0.074777
0.068058	0.026586
0.174987	0.026782
0.162222	0.011872
0.022152	0.255232
0.326947	0.011774
0.180673	0.021239
0.078181	0.021404
0.012945	0.005748
0.026486	0.019255
0.074257	0.206809
	0.065432
0.223702	0.024395
0.055787	0.024596
0.218193	0.008595
0.018622
	0.038151
0.063373	0.131304
0.17767	0.018416
0.033232	0.028154
0.028716	0.018287
0.068432	0.036589
0.008912	0.081738
0.040199	0.067049
0.044902	0.008151
0.184589	0.023823
0.03595	0.055811
0.112685	0.118243
0.034324	0.015058
0.0085	0.082189
0.07011	0.03622
0.050064	0.017654
0.036908	0.021635
	0.027534
0.141861	0.053087
0.175674	0.059033
0.016787	0.012821
0.181136
0.099716	0.01136
0.047902
0.049449	0.027968
0.101779	0.074703
0.130905	0.038155
0.035406	0.151381
0.042757	0.084594
0.114139	0.0494
0.059147	0.5183
0.026152	0.041659
0.02529	0.012568
0.044294	0.012419
0.036439	0.01229
0.042584	0.066526
0.124791	0.006712
0.205595	0.016836
	0.023201
0.187991	0.061035
0.21955	0.009506
0.012009	0.05521
0.039603	0.01565
0.05228	0.059837
0.221936	0.007503
0.098986	0.06679
0.025566	0.057267
0.016652	0.075238
0.183112	0.066235
0.002747	0.026407
0.031158	0.016294
0.023468	0.02248
0.020539	0.04509
0.111694	0.021377
0.157919	0.005512
0.048594
0.056636	0.038238
0.043694	0.054094
0.108493	0.035692
0.020926	0.069148
0.023388	0.000875
0.073861	0.014151
0.118478
0.079381	0.067189
0.034583	0.018674
0.235648	0.034846
0.061307	0.220596
0.175766	0.033744
0.316116	0.167754
0.116893	0.034002
0.096235	0.256495
0.094922	0.003657
0.101945	0.009829
0.133321	0.05986
0.006831	0.026679
0.069713	0.089822
0.074338	0.080208
0.011402	0.289507
0.096694	0.045166
0.183243	0.049825
0.141869	0.015381
0.328568	0.003924
0.040205	0.027268
0.066464	0.03358
0.037207	0.047432
0.049753	0.080275
0.429661	0.03129
0.0849	0.019819
0.047003	0.015637
0.242713	0.013331
0.264978	0.085908
0.094427	0.060654
0.1741	0.213912
0.044064	0.002094
0.03947	0.02805
0.066484	0.006284
0.07776	0.313075
0.124867	0.085028
0.202846	0.218414
0.420592	0.009136
0.193859	0.167025
0.052888	0.204847
0.057682	0.101592
0.083397	0.025413
0.203904	0.062907
0.164093	0.021877
0.292374	0.043868
0.148509	0.029757
0.032941	0.102849
0.105291	0.113903
0.233357	0.029767
0.111655	0.013385
0.147635	0.021513
0.145618	0.059297
0.024709	0.005887
0.07334	0.010999
0.102931	0.00192
0.051522	0.045903
0.10078	0.016727
0.113272	0.041901
0.026238	0.035007
0.120003	0.182938
0.019137	0.121572
0.257078	0.111662
0.149839	0.081517
0.015749	0.027311
0.004175
0.018153	0.002951
0.026178	0.021167
	0.018523
0.054756	0.03449
0.055091	0.120184
0.310533	0.127616
0.061049	0.427814
0.142544	0.016222
	0.019126
0.119694	0.021247
0.013463	0.16493
0.571439	0.14419
0.059398
0.113646	0.088507
0.071689	0.031915
0.010284	0.019665
	0.043186
0.046843	0.00781
0.020764	0.036773
0.14022	0.070609
0.039636	0.048805
0.140592	0.238015
0.096873	0.011043
0.133	0.058524
0.045992	0.064236
0.108602	0.193508
0.157852	0.148884
0.050825	0.039283
0.030136	0.024447
0.014462	0.006109
0.027142	0.026559
0.105178	0.027798
0.253695	0.15047
0.093119	0.093222
0.158684	0.062808
0.042014	0.137066
0.022406	0.049585
0.013174	0.038246
0.034	0.014373
0.010155	0.16095
0.015116	0.020093
0.027411	0.032165
0.039631
0.174716	0.039094
0.061623	0.114669
0.052044	0.015114
0.030062	0.037206
0.164748	0.018044
0.354111
0.341448	0.007416
0.173011	0.0823
0.055483	0.082375
0.09678
0.059889	0.050201
0.043577	0.309186
0.071582	0.306972
0.034059	0.17174
0.019874	0.016122
0.172992	0.127258
0.1005	0.142756
	0.134969
0.029922	0.136985
0.12311	0.021105
0.365895	0.081825
0.021107	0.052896
	0.028663
0.033583	0.055677
0.011867	0.124698
0.045019	0.124417
0.205063	0.099666
0.019283	0.046536
0.123171	0.039724
0.128398	0.090908
0.022173	0.14687
0.098312	0.025704
0.016433	0.073142
0.110758	0.020363
0.127703	0.020996
0.071069	0.013824
0.021578	0.084562
0.036014	0.041511
0.018514	0.010206
0.007972	0.078473
0.049702	0.008469
	0.107203
0.093165	0.01697
0.037081	0.062912
	0.106235
0.036366	0.138687
0.169487	0.030623
0.061392	0.312731
0.033	0.310009
0.057704	0.017099
	0.121186
0.043864	0.0114
0.114583	0.044254
0.146235	0.078365
0.106232	0.024228
0.178968	0.017258
0.017213	0.010444
0.089241	0.036955
0.136453	0.022532
0.182641	0.048573
0.084649	0.037569
0.039282	0.03064
0.140044	0.12466
0.009868	0.023195
0.183908	0.06933
0.142318	0.045501
0.095345	0.056984
0.180896
0.052266	0.049343
0.065713	0.156238
0.09637	0.10188
	0.016349
0.026331	0.048141
0.148639	0.018788
0.041102	0.02988
0.05615	0.082889
0.023458	0.049948
0.063501	0.063608
0.007775	0.020128
0.071192	0.038656
0.037904	0.021876
0.066152	0.066092
0.0552	0.048382
0.120438	0.08062
0.175375	0.077312
0.063252	0.031436
0.035966	0.017081
0.053364	0.054874
0.098781	0.023384
0.07993	0.029889
0.102162	0.060403
	0.160368
0.042143	0.050451
0.043699	0.096184
0.0455	0.056267
0.071145
0.038308	0.023854
0.054483	0.086244
0.021324
0.049265	0.034062
	0.06911
0.027731	0.153003
0.059042	0.099238
	0.03138
0.10575	0.052366
0.204881	0.213776
0.163082	0.032655
0.021665	0.122418
0.046162	0.04803
0.086583	0.084525
0.007156	0.010913
0.145343	0.017631
0.115451	0.021083
0.074619	0.0945
0.027305
0.371786	0.105046
0.074002	0.012633
0.320944	0.001298
0.032257	0.047726
0.111187	0.116117
0.088317	0.00316
0.070576	0.128242
0.062246	0.049579
0.182257
0.113092	0.013516
0.039367	0.022347
0.11104	0.028457
0.065712	0.13197
0.016063	0.041967
0.011055	0.061495
0.062292	0.179889
0.08865	0.055466
0.122659	0.043019
0.184047	0.075063
0.028501	0.054
	0.13264
0.050438	0.238138
0.070092	0.005871
0.054031	0.054128
0.192732	0.196763
0.119757	0.012088
0.120962	0.044175
0.078132	0.095046
0.145894
0.144631	0.178414
0.045287	0.011162
0.09497	0.035551
0.193595	0.139784
0.099677	0.027251
0.167439	0.055817
0.021949	0.026242
0.045999	0.052793
0.113534	0.097037
0.07225	0.277157
0.09752	0.041124
0.024526	0.04162
0.028322	0.02614
0.208744	0.111561
0.064634	0.010075
0.103995	0.048212
0.150248	0.104863
0.193568	0.033627
0.060877	0.040626
0.049072	0.033867
0.049472	0.029691
0.048592	0.067414
0.068358	0.06061
0.068567	0.010882
0.105812	0.076443
0.16447	0.005663
0.113878	0.006279
0.064592
0.373249	0.038056
0.07689	0.136541
	0.029805
0.0952	0.055592
0.033713	0.113909
0.06572	0.005348
0.068574	0.07763
0.053233	0.321648
	0.029934
	0.013336
0.050621	0.027662
0.22635	0.234343
0.080936	0.093729
0.177139	0.039152
0.082985	0.036373
0.107487	0.086679
0.183624	0.061514
0.111434	0.006755
0.065174	0.02039
0.010952	0.145026
0.03745	0.219878
0.23596	0.217148
0.164167	0.145477
0.089479	0.203807
0.059065	0.001959
0.053532	0.007696
	0.184456
0.122953	0.074293
0.029229	0.156514
0.167642	0.01589
0.044167	0.007176
	0.035205
0.088616	0.161231
0.051896	0.043274
0.109429	0.087862
0.275369	0.112108
0.058283	0.088345
0.068485	0.014942
0.024275	0.011251
0.175566	0.073941
0.122001	0.047174
0.158294	0.063526
0.035569	0.272319
0.049953	0.011047
0.101116	0.051419
0.064305	0.187891
0.045678	0.030613
0.072489	0.033366
0.114608	0.044242
0.031071	0.145027
0.076446	0.106622
0.224255	0.020591
0.077267	0.520373
0.051831	0.032833
0.089965	0.097121
0.069605	0.018666
0.096809	0.028823
0.156245	0.073093
0.203309	0.013367
0.046325	0.017252
0.073571	0.160114
0.093733	0.016566
0.027554	0.025301
0.071756	0.121202
0.127498	0.01273
0.082574	0.016448
0.128547	0.007459
0.171405	0.02847
0.193952	0.009119
0.103257	0.012063
0.211089	0.037763
0.068303	0.175194
0.285023	0.048868
0.058047	0.120643
0.324551	0.132981
0.140801	0.081543
0.049668	0.162056
	0.149861
0.056622	0.16508
0.032851
0.010938	0.150646
0.198059	0.004861
0.170133	0.148686
0.063122	0.020665
0.174725	0.088136
0.044056	0.059662
0.051614	0.055673
0.120339	0.042739
0.033508	0.016618
0.075523	0.132668
0.067144
0.166686	0.028958
0.089087	0.017574
0.045738	0.073291
0.141379	0.020338
0.393411	0.164956
0.09702	0.070788
0.100379	0.044835
0.079082	0.05866
0.061705	0.006336
0.071689	0.019824
0.122728	0.078991
0.038616	0.028463
	0.117191
0.024327	0.042883
0.069715	0.041656
0.122152	0.028241
0.044777	0.068226
0.078866	0.037582
0.15246	0.011066
0.050546	0.010606
0.051682	0.02951
0.019499
0.125719	0.010779
	0.042217
0.082567	0.012149
0.029293	0.017931
0.049732	0.046739
0.183256
0.062653	0.141209
0.178813	0.011866
0.04831	0.061367
0.031178
0.079393	0.067842
0.18728	0.067797
0.041209	0.134624
0.055348	0.20662
0.03031	0.180206
	0.043679
	0.052508
	0.188049
	0.025051
	0.154759
	0.086494
	0.142569
	0.051245
	0.054082
	0.06866
	0.041698
	0.132418
	0.076263
	0.149671
	0.063941
	0.151592
	0.07398
	0.25512
	0.052056
	0.01792
	0.1905
	0.091439
	0.132286
	0.082054
	0.141669
	0.09561
	0.05791
	0.098874
	0.134657
	0.092209
	0.070747
	0.161322
	0.30788
	0.043999
	0.003507
	0.028827
	0.100119
	0.114664
	0.033583
	0.018178
	0.006774
	0.223111
	0.029262
	0.005498
	0.115087
	0.10709
	0.18336
	0.071416
	0.072246
	0.092655
	0.097203
	0.071688
	0.455075
	0.029454
	0.070382
	0.313426
	0.135392
	0.140508
	0.156584
	0.104834
	0.023559
	0.054345
	0.18618
	0.097798
	0.059814
	0.040193
	0.019569
	0.115527
	0.031438
	0.06669
	0.12057
	0.062687
	0.130937
	0.127951
	0.027307
	0.119782
	0.008457
	0.06463
	0.177299
	0.11338
	0.092001
	0.110992
	0.009707
	0.021069
	0.058073
	0.074332
	0.05406
	0.081164
	0.19612
	0.047337
	0.066359
	0.013729
	0.006163
	0.095207
	0.458847
	0.019217
	0.026256
	0.191967
	0.069727
	0.019783
	0.101112
	0.067371
	0.253853
	0.029268
	0.133897
	0.109197
	0.026125
	0.068141
	0.03941
	0.110636
	0.135863
	0.153319
	0.070511
	0.040418
	0.030321
	0.008164
	0.067215
	0.03846
	0.06763
	0.213319
	0.035786
	0.046565
	0.033694
	0.020644
	0.299736
	0.010964
	0.140694
	0.117311
	0.039831
	0.02424
	0.072895
	0.099739
	0.130421
	0.202171
	0.140768
	0.097325
	0.014144
	0.100216
	0.041358
	0.046174
	0.069462
	0.025421
	0.108992
	0.069531
	0.084395
	0.124647
	0.016616
	0.118367
	0.044348
	0.105583
	0.035608
	0.037184
	0.12032
	0.023021
	0.053137
	0.063003
	0.04839
	0.073445
	0.003172
	0.190087
	0.041037
	0.023311
	0.156759
	0.112495
	0.086517
	0.013624
	0.222371
	0.105129
	0.110935
	0.0343
	0.158411
	0.008078
	0.020407
	0.203502
	0.052348
	0.073768
	0.033633
	0.033746
	0.04189
	0.017168
	0.241895
	0.024357
	0.102046
	0.062933
	0.06332
	0.027976
	0.441345
	0.044946
	0.096689
	0.011416
	0.03893
	0.098559
	0.076967
	0.078174
	0.051009
	0.192589
	0.307772
	0.046786
	0.041865
	0.038779
	0.020318
	0.056165
	0.022581
	0.011589
	0.00913
	0.034376
	0.07485
	0.056979
	0.031748
	0.057661
	0.10753
	0.123521
	0.035526
	0.039084
	0.042957
	0.138738
	0.084452
	0.047637
	0.033147
	0.044305
	0.064787
	0.013856
	0.015177
	0.034031
	0.063744
	0.052725
	0.215518
	0.280862
	0.03132
	0.299387
	0.034034
	0.027112
	0.10487
	0.07828
	0.045649
	0.064383
	0.029572
	0.145208
	0.144969
	0.090592
	0.072304
	0.025008
	0.141345
	0.093952
	0.15658
	0.050876
	0.019503
	0.039806
	0.083456
	0.144317
	0.056941
	0.072052
	0.042059
	0.016723
	0.178141
	0.068178
	0.022724
	0.054035
	0.027859
	0.025103
	0.036412
	0.029094
	0.0357
	0.06655
	0.104922
	0.035675
	0.168572
	0.123308
	0.068275
	0.033547
	0.098111
	0.189516
	0.036173
	0.114705
	0.116601
	0.031707
	0.033958
	0.049542
	0.011633
	0.020007
	0.026094
	0.017096
	0.072791
	0.01028
	0.037678
	0.286763
	0.008464
	0.018397
	0.005173
	0.117835
	0.014839
	0.15412
	0.18065
	0.060564
	0.080701
	0.059812
	0.05728
	0.023925
	0.067652
	0.158573
	0.246918
	0.1398
	0.066391
	0.099129
	0.105961
	0.169103
	0.010297
	0.115566
	0.056796
	0.28635
	0.229097
	0.033535
	0.012744
	0.048025
	0.019806
	0.06316
	0.007077
	0.113109
	0.12411
	0.101652
	0.020159
	0.01389
	0.025429
	0.198474
	0.018413
	0.113862
	0.024001
	0.149223
	0.06541
	0.064516
	0.016672
	0.026932
	0.024036
	0.030962
	0.122318
	0.060569
	0.053221
	0.024093
	0.064491
	0.056621
	0.017914
	0.052178
	0.060888
	0.103691
	0.116564
	0.016675
	0.162902
	0.088304
	0.223064
	0.073551
	0.024203
	0.175269
	0.106189
	0.020301
	0.018864
	0.122797
	0.076339
	0.053231
	0.029173
	0.012693
	0.044003
	0.094143
	0.016577
	0.11513
	0.090153
	0.002023
	0.107376
	0.202849
	0.031153
	0.015454
	0.033522
	0.028426
	0.024988
	0.098103
	0.027484
	0.027058
	0.06029
	0.049814
	0.020161
	0.031617
	0.015074
	0.020902
	0.013126
	0.049259
	0.014526
	0.062409
	0.085609
	0.018347
	0.166633
	0.028065
	0.036676
	0.014264
	0.042533
	0.041995
	0.039653
	0.037608
	0.213731
	0.017472
	0.21539
	0.008524
	0.165143
	0.029839
	0.051601
	0.046224
	0.050566
	0.014415
	0.139521
	0.01532
	0.029619
	0.033897
	0.055501
	0.038315
[truncated: 77 more rows]

## Sheet: Fig2H
	Basal Keratinocytes					Suprabasal Keratinocytes
	X	Y
cell 1	0	0			cell 1	0	0
	-1.2856	-0.002				-0.2853	0.1357
	-1.2398	0.0619				-0.5843	0.3269
	-2.3428	0.8165				-0.1138	0.6821
	-3.9454	1.7398				-0.4697	1.288
	-3.8659	0.8955				1.3991	-1.2507
	-7.1044	2.852				0.979	-1.6218
	-9.7925	5.5766				0.3273	-1.5398
	-12.3848	7.1798				1.0662	-0.9757
	-14.8635	9.7162				0.8396	-2.2014
	-17.7822	12.4798				0.3257	-1.3618
	-19.9262	16.9843				0.1971	0.0824
	-21.9179	21.0222				-2.0405	-0.3549
	-23.4829	24.0932				-0.6794	0.107
	-27.1113	31.3217				-1.6336	2.6914
	-30.7856	35.1814				-1.1157	2.3854
cell 2	0	0			cell 2	0	0
	-1.0524	0.4417				0.004	0.9769
	-3.9333	1.3577				0.1897	1.2893
	-5.0486	1.8624				0.8816	1.2966
	-6.8399	3.2813				0.9326	2.2462
	-7.8021	3.7618				2.0037	0.8343
	-10.1229	7.1199				1.7958	1.0196
	-12.8007	10.9884				1.4852	1.4248
	-13.8062	12.732				1.6603	1.0368
	-14.4	15.7732				1.6586	1.6838
	-13.9752	17.6974				1.4205	1.0906
	-14.2082	19.772				1.2439	1.3345
	-13.7792	22.5284				0.6657	1.6574
	-12.5056	24.6929				1.3716	1.0868
	-13.1736	29.894				0.8415	2.4031
	-14.6098	32.909				0.0648	3.092
cell 3	0	0			cell 3	0	0
	-1.035	1.32				0.0927	0.6168
	-0.5669	6.0103				-0.7607	0.6659
	-0.4322	7.403				0.5818	0.6398
	-1.1578	13.1312				0.8291	2.8236
	-1.643	17.3884				1.2334	0.6214
	-2.5997	21.5553				1.06	2.0974
	-5.236	28.787				0.2969	2.2304
	-6.0083	32.584				-0.2201	1.2024
	-8.2518	39.4069				-1.3037	2.1624
	-10.877	45.252				-0.9572	0.8993
	-13.9975	51.0273				-1.284	1.7747
	-18.7938	57.6672				-2.1422	1.0516
	-22.0379	63.3758				-1.1456	1.518
	-23.9711	67.5861				-1.3065	2.0416
	-27.4965	70.9704				-2.0657	1.6087
cell 4	0	0			cell 4	0	0
	-1.8647	1.3996				0.0936	-0.7393
	-3.4362	2.1657				-0.6887	-1.1231
	-3.8902	2.8142				0.5206	-1.9009
	-5.6145	4.5126				0.4427	-0.5991
	-6.5473	4.4957				1.6978	-2.0255
	-8.3876	6.7955				1.6915	-1.445
	-10.448	10.0397				0.1785	-0.8769
	-12.6843	11.5435				1.4499	-1.5904
	-14.5883	14.742				-0.2141	-0.2632
	-15.9438	15.5741				0.1675	-0.535
	-17.3606	18.0389				0.2656	-1.3685
	-18.8586	21.0446				-0.0634	-0.8156
	-18.9613	22.4352				0.1709	-1.72
	-20.3664	25.3866				1.2377	-1.1623
	-21.5494	27.1057				0.0644	-1.2871
cell 5	0	0			cell 5	0	0
	-0.3768	2.922				-1.0678	0.0726
	-0.7768	3.829				-1.743	0.117
	-1.3659	5.7398				-0.7653	1.6263
	-3.3559	9.4272				-1.0458	1.9963
	-3.4683	9.5365				-0.3059	1.2327
	-4.5692	10.7705				-0.5191	1.4304
	-7.8354	13.6367				-0.3403	0.5129
	-9.4118	13.4975				-0.1956	0.0997
	-13.4484	17.8543				-0.1378	1.3756
	-16.0663	19.6777				-0.2959	2.4206
	-18.1268	22.3013				0.4534	1.1606
	-21.1668	26.5357				-1.1796	2.2574
	-23.3677	29.3561				0.1436	0.4623
	-25.1114	32.8604				-0.703	1.0342
	-27.6291	34.9676				-1.1965	0.7283
cell 6	0	0			cell 6	0	0
	-0.569	0.5631				-0.756	-0.9573
	-1.2714	1.4263				-0.3555	-1.5402
	-0.8958	2.0844				-0.5641	-0.1182
	-1.3619	3.7253				-1.6284	1.3523
	-0.9805	3.3881				0.3535	-1.3513
	-1.7498	5.094				-0.575	-0.9732
	-1.6816	6.3223				-2.0185	-0.9123
	-0.5042	6.6078				0.4974	-1.26
	0.6197	7.2264				-0.607	-0.3545
	1.9979	6.5451				-1.709	-0.8284
	3.3292	6.59				0.0243	0.3477
	4.3655	6.3518				-0.2295	0.4023
	5.7197	5.6908				-0.5446	-1.1364
	5.1935	7.025				-1.2243	-0.598
	5.0487	7.6041				-1.0115	-1.0035
cell 7	0	0			cell 7	0	0
	0.1019	1.7191				-1.2964	1.5188
	0.6483	2.9232				-2.5999	3.2476
	1.5943	3.316				-2.9297	5.097
	2.1586	4.0227				-4.3929	7.7987
	4.3787	2.1044				-4.856	9.1064
	4.213	2.6611				-6.1125	12.0932
	4.5253	2.6532				-7.287	15.1347
	5.0679	1.3788				-7.325	16.2516
	4.6768	1.1224				-7.0659	14.1919
	2.184	0.4939				-6.9361	10.0681
	-0.6064	1.4388				-6.5922	7.3788
	-4.5786	4.0022				-6.8215	6.4991
	-6.1417	4.1402				-6.8901	4.4592
	-7.3832	6.1759				-8.1281	4.7121
	-9.4393	8.2023				-9.0627	3.9
cell 8	0	0			cell 8	0	0
	-0.6555	-0.5181				0.1213	0.4055
	-1.5572	-1.1347				-0.198	0.2206
	-1.8686	-1.5983				0.2777	0.633
	-4.516	-1.7395				-0.4086	1.41
	-6.0865	-2.3244				0.502	-0.1455
	-8.9375	-1.5721				0.8704	0.3989
	-12.5113	0.2605				0.0675	0.4176
	-13.8917	0.3672				0.3057	-0.0099
	-16.1124	3.3165				0.5834	1.1708
	-19.4968	5.3361				-0.0287	0.185
	-22.2281	9.0859				0.2098	1.3468
	-26.1095	13.4903				-0.7545	0.5898
	-26.8615	18.6624				0.322	-0.3871
	-29.8167	22.5287				-0.115	1.2724
						-0.4329	0.8686
cell 9	0	0
	-0.3917	4.1758			cell 9	0	0
	-1.0659	6.8446				-1.9601	0.706
	-3.5988	11.6005				-1.7373	1.6525
	-5.1935	15.3582				-0.1522	0.99
	-8.5892	18.6056				-0.9521	2.6737
	-12.3055	23.8549				-0.1475	0.4401
	-16.9576	26.8366				-0.4207	0.5929
						-0.5526	1.155
cell 10	0	0				0.0684	0.2054
	-1.0773	0.8865				-0.2006	1.8678
	-2.5453	2.2942				-0.5658	1.3765
	-2.499	2.1274				-0.2556	1.0064
	-3.7718	3.1782				-0.8031	2.8877
	-3.8179	3.371				0.1267	1.5781
	-3.2131	3.3292				-0.4103	2.8118
	-4.9594	4.4141				-1.4286	1.3515
	-5.5456	3.9257
	-6.5431	5.0667
	-8.2816	4.664
	-10.0051	3.7658
	-11.0683	4.0928
	-9.8658	3.7035
	-10.9981	4.4145
	-11.7799	5.6479
cell 11	0	0
	-0.8278	1.0895
	-1.2696	2.8391
	-1.009	4.3646
	-1.8033	6.7667
	-2.1381	7.4689
	-5.1984	9.9025
	-8.168	12.9196
	-9.2829	14.8112
	-10.8909	17.8962
	-12.6191	18.7076
	-12.936	20.5266
	-12.9637	23.0977
	-12.7241	23.8211
	-13.4226	25.6504
	-14.5767	25.0963
cell 12	0	0
	-0.4472	0.7456
	-0.6537	1.7953
	-0.2978	2.6436
	-0.13	4.9935
	1.1417	5.2309
	1.0769	6.9261
	1.3231	9.6756
	2.9154	11.8398
	4.5655	15.1008
	5.7817	17.1712
	6.8902	19.4668
	7.6125	21.3092
	9.3889	21.9302
	9.7671	24.6389
	10.2744	25.9818
cell 13	0	0
	-1.6425	0.752
	-3.4457	1.4287
	-4.2873	2.4407
	-5.9433	4.5237
	-6.0326	5.2571
	-7.6207	7.3742
	-9.24	7.6456
	-10.8762	7.1914
	-12.9655	8.6462
	-15.3418	9.6702
	-17.0936	10.9302
	-19.0631	12.1735
	-19.9423	12.1923
	-21.9332	13.9754
	-24.1516	14.5378
cell 14	0	0
	-0.6522	5.2983
	-1.5448	12.2738
	-1.7401	19.812
	-2.9039	26.5189
	-3.6068	32.9859
	-4.2515	41.8671
	-6.6921	49.8269
	-6.2786	55.6714
	-6.3004	65.2427
	-10.8552	76.415
	-14.056	82.8609
	-15.9302	90.963
	-19.2152	98.0895
	-21.5477	104.912
	-24.3682	111.994
cell 15	0	0
	-2.0064	5.7239
	-4.3493	9.3359
	-5.8774	13.9315
	-9.4408	17.7487
	-10.3629	20.6134
	-14.0966	28.1969
	-17.279	43.717
cell 16	0	0
	0.6328	0.8607
	-1.0718	0.7944
	-0.6647	1.3169
	-2.4805	2.8924
	-4.6651	3.3127
	-7.2463	6.1374
	-11.7496	9.1454
	-13.9814	12.9951
	-16.0081	17.3544
	-17.9047	20.0095
	-18.5407	24.1798
	-18.4765	28.3448
	-20.5984	33.6106
	-24.3075	38.2819
	-27.4627	40.1029
cell 17	0	0
	-0.6589	-0.5603
	-0.2718	0.1939
	-1.1557	0.9329
	-2.7289	2.9405
	-2.4965	4.4343
	-4.2376	8.0498
	-5.948	13.6086
	-6.8326	17.306
	-9.3108	23.026
	-11.3226	30.1783
	-15.8571	34.8118
	-18.6902	37.6824
	-20.4737	40.5574
	-24.198	43.111
	-29.2164	44.7318
